# Supplementary material for: A map of human PRDM9 binding provides evidence for novel behaviors of PRDM9 and other zinc-finger proteins in meiosis
Source: eLife. 2017 Oct 26;6:e28383. doi: 10.7554/eLife.28383 (PMC5705219; doi:10.7554/eLife.28383)
Supplement: Figure 1—source data 1. [file elife-28383-fig1-data1.xlsx]

## Sheet: ChIP-seq samples
	Transfection with:	ChIP antibody	Proportion signal, rep1	Proportion signal, rep2	Fragment number, rep1	Fragment number, rep2	Peak number	Fraction of genome enriched	GEO sample accession for rep1	GEO sample accession for rep2
N-terminal tags (protocol N)	GFP-hPRDM9	GFP	0.225	0.374	80844035	79526431	170198	0.012	GSM2643611	GSM2643612
	GFP-hPRDM9	H3K4me3	0.75	n/a	77625060	n/a	470314	0.052	GSM2643614
	GFP-hPRDM9	none (Input)	n/a	n/a	100861414	n/a			GSM2643613
	Untransfected	H3K4me3	0.823	0.794	59156993	72839266	45758	0.007	GSM2643608	GSM2643609
	Untransfected	none (Input)	n/a	n/a	98664592	n/a			GSM2643610
C-terminal tags (protocol C)	cPRDM9-HAorV5	HA/V5	0.443	0.394	36662728	44594666	247717	0.011	GSM2643617	GSM2643618
	hPRDM9-HAorV5	HA/V5	0.374	0.51	39385214	38717735	213885	0.02	GSM2643619	GSM2643620
	hPRDM9-HA	H3K4me3	0.522	0.544	52439279	54451480	221446	0.024	GSM2643625	GSM2643626
	hPRDM9-HA	H3K36me3	0.334	n/a	59690192	n/a	33625	0.001	GSM2643622
	hPRDM9-HA	none (Input)	n/a	n/a	53219513	n/a			GSM2643616
	Untransfected	H3K4me3	0.68	0.669	57205316	60883503	37932	0.006	GSM2643623	GSM2643624
	Untransfected	H3K36me3	0.502	n/a	52368417	n/a	263983	0.027	GSM2643621
	Untransfected	none (Input)	n/a	n/a	56445392	n/a			GSM2643615
The datasets utilized in this analysis include the N-terminal YFP-tagged human construct used for most analyses as well as the C-terminal tagged constructs used in subsequent experiments (RNA-seq, ATAC-seq, co-IP). Columns 3 and 4 list the proportion of fragments estimated to arise from true signal genome-wide, as computed by our peak calling algorithm. Replicate 2 is assigned ``n/a'' when only o…
