# Supplementary material for: A map of human PRDM9 binding provides evidence for novel behaviors of PRDM9 and other zinc-finger proteins in meiosis
Source: eLife. 2017 Oct 26;6:e28383. doi: 10.7554/eLife.28383 (PMC5705219; doi:10.7554/eLife.28383)
Supplement: Figure 3—source data 1. [file elife-28383-fig3-data1.xlsx]

## Sheet: FinalValues
	TBP-normalized Ct						TBP-normalized delta Ct from UT
CTCF	r1	r2	r3	mean	sd	pval	dr1	dr2	dr3	mean	sd	CI
chimp	1.46	1.31	0.77	1.18	0.362905	0.285461	-0.11	-0.05	0.655	0.165	0.425412	1.05678
human	1.5	1.615	1.35	1.48833	0.132885	0.183841	-0.15	-0.355	0.075	-0.143333	0.215078	0.534282
Zfonly	1.115	1.22	1.08	1.13833	0.0728583	0.0731946	0.235	0.04	0.345	0.206667	0.154461	0.383703
UT	1.35	1.26	1.425	1.345	0.0826136
CTCFL	r1	r2	r3	mean	sd	pval	dr1	dr2	dr3	mean	sd	CI
chimp	7.79	7.805	6.85	7.48167	0.547091	0.023065	1.125	1.925	2.565	1.87167	0.72148	1.79226
human	3.12	3.595	3.34	3.35167	0.237715	0.000152315	5.795	6.135	6.075	6.00167	0.181475	0.45081
Zfonly	9.4	9.88	9.615	9.63167	0.240434	0.0582382	-0.485	-0.15	-0.2	-0.278333	0.180716	0.448924
UT	8.915	9.73	9.415	9.35333	0.410985
VCX	r1	r2	r3	mean	sd	pval	dr1	dr2	dr3	mean	sd	CI
chimp	7.7	7.2	7.23	7.37667	0.280416	0.000111875	0.82	0.78	0.81	0.803333	0.0208167	0.0517115
human	1.975	0.98	0.875	1.27667	0.607049	0.00036021	6.545	7	7.165	6.90333	0.321105	0.797669
Zfonly	6.995	7.84	7.97	7.60167	0.529394	0.173289	1.525	0.14	0.07	0.578333	0.820584	2.03844
UT	8.52	7.98	8.04	8.18	0.295973
Final Plotted Values:
Means
sample	VCX	CTCFL	CTCF
Human	6.90333	6.00167	-0.143333
Zfonly	0.578333	-0.278333	0.206667
Chimp	0.803333	1.87167	0.165
CIs
sample	VCX	CTCFL	CTCF
Human	0.797669	0.45081	0.534282
Zfonly	2.03844	0.448924	0.383703
Chimp	0.0517115	1.79226	1.05678

## Sheet: RawCt
Plate	Well	Gene	Treatment	Sample	GeneType	Ct	mean	normalized to TBP		Table of Results
1	A05	CTCF	Chimp	7	Target	24.53	24.425	1.46		CTCF	r1	r2	r3	mean	sd	p-value
1	A06	CTCF	Chimp	7	Target	24.32				chimp	1.46	1.31	0.77	1.18	0.362905	0.285461
1	B05	CTCF	Chimp	8	Target	24.48	24.435	1.31		human	1.5	1.615	1.35	1.48833	0.132885	0.183841
1	B06	CTCF	Chimp	8	Target	24.39				Zfonly	1.115	1.22	1.08	1.13833	0.0728583	0.0731946
1	C05	CTCF	Chimp	9	Target	24.34	24.405	0.77		UT	1.35	1.26	1.425	1.345	0.0826136
1	C06	CTCF	Chimp	9	Target	24.47
2	A05	CTCFL	Chimp	7	Target	30.51	30.755	7.79
2	A06	CTCFL	Chimp	7	Target	31				CTCFL	r1	r2	r3	mean	sd	p-value
2	B05	CTCFL	Chimp	8	Target	30.94	30.93	7.805		chimp	7.79	7.805	6.85	7.48167	0.547091	0.023065
2	B06	CTCFL	Chimp	8	Target	30.92				human	3.12	3.595	3.34	3.35167	0.237715	0.000152315
2	C05	CTCFL	Chimp	9	Target	30.6	30.485	6.85		Zfonly	9.4	9.88	9.615	9.63167	0.240434	0.0582382
2	C06	CTCFL	Chimp	9	Target	30.37				UT	8.915	9.73	9.415	9.35333	0.410985
2	D05	VCX	Chimp	7	Target	30.71	30.665	7.7
2	D06	VCX	Chimp	7	Target	30.62
2	E05	VCX	Chimp	8	Target	30.53	30.325	7.2		VCX	r1	r2	r3	mean	sd	p-value
2	E06	VCX	Chimp	8	Target	30.12				chimp	7.7	7.2	7.23	7.37667	0.280416	0.000111875
2	F05	VCX	Chimp	9	Target	31.05	30.865	7.23		human	1.975	0.98	0.875	1.27667	0.607049	0.00036021
2	F06	VCX	Chimp	9	Target	30.68				Zfonly	6.995	7.84	7.97	7.60167	0.529394	0.173289
2	G07	TBP	Chimp	7	Control	23.05	22.965			UT	8.52	7.98	8.04	8.18	0.295973
2	G08	TBP	Chimp	7	Control	22.88
2	H07	TBP	Chimp	8	Control	23.21	23.125
2	H08	TBP	Chimp	8	Control	23.04
2	G09	TBP	Chimp	9	Control	23.68	23.635
2	G10	TBP	Chimp	9	Control	23.59
1	A03	CTCF	Human	4	Target	25	25.075	1.5
1	A04	CTCF	Human	4	Target	25.15
1	B03	CTCF	Human	5	Target	24.88	24.88	1.615
1	B04	CTCF	Human	5	Target	24.88
1	C03	CTCF	Human	6	Target	24.68	24.58	1.35
1	C04	CTCF	Human	6	Target	24.48
2	A03	CTCFL	Human	4	Target	26.58	26.695	3.12
2	A04	CTCFL	Human	4	Target	26.81
2	B03	CTCFL	Human	5	Target	26.67	26.86	3.595
2	B04	CTCFL	Human	5	Target	27.05
2	C03	CTCFL	Human	6	Target	26.51	26.57	3.34
2	C04	CTCFL	Human	6	Target	26.63
2	D03	VCX	Human	4	Target	25.23	25.205	1.975
2	D04	VCX	Human	4	Target	25.18
2	E03	VCX	Human	5	Target	25.57	25.48	0.98
2	E04	VCX	Human	5	Target	25.39
2	F03	VCX	Human	6	Target	25.52	25.305	0.875
2	F04	VCX	Human	6	Target	25.09
2	H03	TBP	Human	4	Control	23.63	23.575
2	H04	TBP	Human	4	Control	23.52
2	G05	TBP	Human	5	Control	23.34	23.265
2	G06	TBP	Human	5	Control	23.19
2	H05	TBP	Human	6	Control	23.21	23.23
2	H06	TBP	Human	6	Control	23.25
1	A01	CTCF	UT	1	Target	24.56	24.5	1.35
1	A02	CTCF	UT	1	Target	24.44
1	B01	CTCF	UT	2	Target	24.56	24.43	1.26
1	B02	CTCF	UT	2	Target	24.3
1	C01	CTCF	UT	3	Target	24.65	24.455	1.425
1	C02	CTCF	UT	3	Target	24.26
2	A01	CTCFL	UT	1	Target	32.62	32.635	8.915
2	A02	CTCFL	UT	1	Target	32.65
2	B01	CTCFL	UT	2	Target	33.41	33.305	9.73
2	B02	CTCFL	UT	2	Target	33.2
2	C01	CTCFL	UT	3	Target	33.48	33.01	9.415
2	C02	CTCFL	UT	3	Target	32.54
2	D01	VCX	UT	1	Target	32.4	32.24	8.52
2	D02	VCX	UT	1	Target	32.08
2	E01	VCX	UT	2	Target	31.82	31.555	7.98
2	E02	VCX	UT	2	Target	31.29
2	F01	VCX	UT	3	Target	31.55	31.635	8.04
2	F02	VCX	UT	3	Target	31.72
2	G01	TBP	UT	1	Control	23.67	23.72
2	G02	TBP	UT	1	Control	23.77
2	H01	TBP	UT	2	Control	23.59	23.575
2	H02	TBP	UT	2	Control	23.56
2	G03	TBP	UT	3	Control	23.64	23.595
2	G04	TBP	UT	3	Control	23.55
1	A09	CTCF	ZFonly	13	Target	24.57	24.615	1.115
1	A10	CTCF	ZFonly	13	Target	24.66
1	B09	CTCF	ZFonly	14	Target	24.52	24.62	1.22
1	B10	CTCF	ZFonly	14	Target	24.72
1	C09	CTCF	ZFonly	15	Target	24.39	24.505	1.08
1	C10	CTCF	ZFonly	15	Target	24.62
2	A07	CTCFL	ZFonly	13	Target	32.85	32.9	9.4
2	A08	CTCFL	ZFonly	13	Target	32.95
2	B07	CTCFL	ZFonly	14	Target	33.38	33.28	9.88
2	B08	CTCFL	ZFonly	14	Target	33.18
2	C07	CTCFL	ZFonly	15	Target	32.86	33.04	9.615
2	C08	CTCFL	ZFonly	15	Target	33.22
2	D07	VCX	ZFonly	13	Target	30.21	30.495	6.995
2	D08	VCX	ZFonly	13	Target	30.78
2	E07	VCX	ZFonly	14	Target	31.28	31.24	7.84
2	E08	VCX	ZFonly	14	Target	31.2
2	F07	VCX	ZFonly	15	Target	31.5	31.395	7.97
2	F08	VCX	ZFonly	15	Target	31.29
2	H09	TBP	ZFonly	13	Control	23.19	23.5
2	H10	TBP	ZFonly	13	Control	23.81
2	G11	TBP	ZFonly	14	Control	23.33	23.4
2	G12	TBP	ZFonly	14	Control	23.47
2	H11	TBP	ZFonly	15	Control	23.43	23.425
2	H12	TBP	ZFonly	15	Control	23.42
1	D09	TBP	UT	1	Control	23.02	23.15
1	D10	TBP	UT	1	Control	23.28
1	E09	TBP	UT	2	Control	23.3	23.17
1	E10	TBP	UT	2	Control	23.04
1	F09	TBP	UT	3	Control	23.03	23.03
1	F10	TBP	UT	3	Control	23.03

## Sheet: Primers
Gene	Forward Primer	Reverse Primer	Reference
TBP	CACGAACCACGGCACTGATT	TTTTCTTGCTGCCAGTCTGGAC	Hines et al. (2010)
CTCFL	ACCTGCACAGACATTCGGAGAAGT	AACTGTTCTCCCTTCGTGGTGGAA	Hines et al. (2010)
CTCF	TCGTCGTTACAAACACACCCACGA	CTGCACAAACTGCACTGAAACGGA	Hines et al. (2010)
VCX	GGCCAAGGCCACGGAGG	TGGTGAGATCTCTGAGGTCT	Lahn and Page (2000)
