# Supplementary material for: A map of human PRDM9 binding provides evidence for novel behaviors of PRDM9 and other zinc-finger proteins in meiosis
Source: eLife. 2017 Oct 26;6:e28383. doi: 10.7554/eLife.28383 (PMC5705219; doi:10.7554/eLife.28383)
Supplement: Figure 3—source data 2. [file elife-28383-fig3-data2.xlsx]

## Sheet: Genes
gene	PRDM9	H3K4me3	fpkm	fpkm	fpkm	fpkm	delta	delta	delta	pval	pval	pval	Chr	TSS
	enrichment	enrichment	Untransfected	Human	Zfonly	Chimp	UH	UZ	UC	UH	UZ	UC		position
LGALS7	3.99	1.485	0.005	1	0.005	0.191	7.644	0	5.256	5e-05	1	0.0302	chr19	39264072
SH3TC1	11.877	1.769	0.005	0.387	0.005	0.057	6.274	0	3.511	5e-05	1	1	chr4	8242571
LGALS9C	1.06	0.714	0.005	0.319	0.005	0.056	5.995	0	3.485	5e-05	1	1	chr17	18380112
RNASE1	8.486	0.561	0.005	0.282	0.005	0.224	5.818	0	5.485	0.00015	1	0.00375	chr14	21271437
KRT5	9.369	2.029	0.005	0.26	0.005	0.141	5.7	0	4.818	0.0001	1	0.0002	chr12	52914314
KRT9	9.276	1.209	0.005	0.212	0.005	0.005	5.406	0	0	5e-05	1	1	chr17	39728305
TH	6.345	2.212	0.005	0.198	0.023	0.079	5.307	2.202	3.982	0.0001	1	1	chr11	2189336
CTCFL	4.575	1.446	0.095	2.625	0.063	0.225	4.782	-0.606	1.235	5e-05	1	0.046	chr20	56100635
CPNE6	2.156	1.25	0.007	0.178	0.059	0.03	4.676	3.071	2.085	5e-05	1	1	chr14	24540106
CAPN8	1.112	0.476	0.026	0.53	0.157	0.291	4.359	2.603	3.494	0.00015	0.0123	0.0012	chr1	223816407
PAX5	7.2	1.099	0.038	0.351	0.233	0.268	3.19	2.602	2.804	0.0001	0.00195	0.00125	chr9	37002672
C1orf116	1.622	0.321	0.088	0.778	0.351	0.518	3.141	1.992	2.554	5e-05	0.0038	0.0004	chr1	207206101
ONECUT3	2.992	2.27	0.152	1.088	0.154	0.15	2.842	0.019	-0.021	5e-05	0.979	0.976	chr19	1752372
LGALS1	2.83	1.315	11.394	81.139	30.436	31.125	2.832	1.417	1.45	5e-05	0.00165	0.0012	chr22	38071615
PDGFB	1.522	3.276	0.233	1.532	0.503	0.556	2.715	1.109	1.255	5e-05	0.0835	0.0523	chr22	39640756
P2RX2	5.616	2.319	1.244	7.843	3.417	3.677	2.656	1.458	1.564	5e-05	0.00305	0.00145	chr12	133195427
NGFR	2.048	2.964	0.626	3.485	1.583	2.088	2.476	1.338	1.738	5e-05	0.0204	0.0036	chr17	47573986
SYT11	0.957	1.663	0.456	2.446	0.957	0.85	2.423	1.069	0.898	5e-05	0.0254	0.0584	chr1	155829300
PALM3	1.89	3.669	1.545	7.929	4.077	4.77	2.359	1.4	1.626	5e-05	0.0025	0.00045	chr19	14168411
HMOX1	0.936	1.564	6.751	30.662	10.291	16.534	2.183	0.608	1.292	5e-05	0.0699	0.0003	chr22	35776828
GAL3ST1	7.307	1.452	1.499	6.332	1.479	2.62	2.079	-0.019	0.806	5e-05	0.97	0.129	chr22	30970498
ATP8B3	1.049	2.477	1.13	4.712	2.177	3.128	2.06	0.946	1.469	5e-05	0.0522	0.0042	chr19	1811623
FOSL2	1.967	2.664	1.532	6.134	2.536	3.684	2.002	0.728	1.266	5e-05	0.0569	0.012	chr2	28615725
SH2D3C	2.872	3.408	1.533	5.824	2.221	3.512	1.926	0.535	1.196	5e-05	0.216	0.00585	chr9	130517309
CDKN2D	0.771	3.116	5.058	17.19	11.401	10.892	1.765	1.172	1.107	5e-05	0.00385	0.00675	chr19	10679654
MAFK	3.05	2.024	6.186	20.995	11.719	17.739	1.763	0.922	1.52	0.0001	0.0554	0.001	chr7	1570350
LIF	3.003	1.941	1.503	4.996	4.003	2.896	1.733	1.413	0.946	5e-05	0.0005	0.0122	chr22	30642728
IL6R	1.624	2.503	1.611	4.759	1.916	3.506	1.563	0.251	1.122	5e-05	0.509	0.0004	chr1	154378091
EPHA2	2.157	3.407	5.909	16.078	9.761	10.661	1.444	0.724	0.851	5e-05	0.0125	0.0036	chr1	16482582
SMAD7	2.888	5.415	4.531	12.164	5.158	7.486	1.425	0.187	0.724	5e-05	0.588	0.0305	chr18	46475703
NOTCH1	1.855	5.053	6.8	17.804	6.679	11.735	1.389	-0.026	0.787	5e-05	0.92	0.0011	chr9	139440314
FGFR3	5.369	6.254	11.744	30.364	18.676	23.851	1.37	0.669	1.022	5e-05	0.0506	0.00035	chr4	1795560
SEMA6B	1.287	1.637	6.606	15	9.978	12.848	1.183	0.595	0.96	0.00015	0.0566	0.0023	chr19	4558507
PHRF1	0.589	5.129	8.779	19.8	11.884	12.134	1.173	0.437	0.467	5e-05	0.085	0.0658	chr11	576521
IER2	1.38	5.972	11.676	25.411	17.648	22.595	1.122	0.596	0.952	0.0001	0.0596	0.0016	chr19	13261247
DNAJB2	2.494	1.497	17.41	37.652	25.993	35.953	1.113	0.578	1.046	0.0001	0.0416	0.00055	chr2	220144238
CREBRF	1.839	5.788	2.783	5.778	5.949	4.231	1.054	1.096	0.604	0.0001	0.0003	0.0278	chr5	172483371
KDM6B	1.259	4.042	12.168	24.441	16.253	21.784	1.006	0.418	0.84	5e-05	0.0844	0.00055	chr17	7748233
PPM1D	0.938	4.159	12.296	24.289	20.058	22.153	0.982	0.706	0.849	5e-05	0.0054	0.00055	chr17	58677544
AGRN	1.807	6.779	22.112	42.043	30.938	39.378	0.927	0.485	0.833	0.00015	0.0451	0.0006	chr1	955503
EEF1A2	1.01	4.184	75.109	137.246	105.601	108.222	0.87	0.492	0.527	0.0001	0.0294	0.0198	chr20	62130505
ATXN7L3B	1.602	4.54	48.86	27.135	33.217	27.907	-0.848	-0.557	-0.808	0.0001	0.0142	0.0007	chr12	74931551
PIGM	1.057	4.649	19.365	8.27	11.237	9.532	-1.227	-0.785	-1.023	5e-05	0.00835	0.00055	chr1	160001783
Genes with significant expression differences in human PRDM9 samples only. 43 protein coding genes with significant PRDM9 binding near the annotated TSS plus differential expression between human-transfected versus untransfected cells (but no significant expression change in the control transfections) are listed along with the enrichment value of the strongest PRDM9 peak within 500 bp of a TSS, t…
