# Supplementary material for: A map of human PRDM9 binding provides evidence for novel behaviors of PRDM9 and other zinc-finger proteins in meiosis
Source: eLife. 2017 Oct 26;6:e28383. doi: 10.7554/eLife.28383 (PMC5705219; doi:10.7554/eLife.28383)
Supplement: Figure 4—source data 1. [file elife-28383-fig4-data1.xlsx]

## Sheet: Hotspots given binding
	Position relative to PRDM9 binding motif in THE1Bc	Pratto hotspots given bindinga			LD-based hotspots given bindinga			PRDM9 binding to THE1B elementsa,d			H3K4me3 without PRDM9 bindingb			H3K4me3 at bound THE1B elementsb
Motif		Estimate	Std. Error	Pr(>|z|)	Estimate	Std. Error	Pr(>|z|)	Estimate	Std. Error	Pr(>|z|)	Estimate	Std. Error	Pr(>|t|)	Estimate	Std. Error	Pr(>|t|)
(Intercept)	-	-1.67086	0.113222	2.7554e-49	-1.32272	0.103374	1.73807e-37	-0.560416	0.057962	4.09622e-22	4.34127	0.00683468	0	4.49015	0.0156237	0
CCTCCCTAGCCACG	1	2.18186	0.387255	1.75888e-08	2.25493	0.389379	6.99314e-09	2.09181	0.449832	3.31614e-06	-	-	-	0.52598	0.050764	1.13433e-24
CCTCCCTAGCCATG	1	1.77429	0.150085	3.00773e-32	1.32327	0.14351	2.95005e-20	2.91622	0.191658	2.77984e-52	-	-	-	0.438462	0.0209711	9.42198e-90
CCTCCCCAGCCACG	1	0.694931	0.265673	0.00890336	0.474814	0.252071	0.0596127	0.501321	0.141412	0.000392451	-	-	-	0.0676702	0.0384414	0.0784684
ATCCATG	-52	-0.877849	0.186554	2.53111e-06	-1.13901	0.191599	2.76895e-09	0.119876	0.0947183	0.205654	0.167084	0.00990738	4.16888e-63	0.124349	0.0214885	8.04942e-09
ACGTGGA	11	1.57967	0.260563	1.3401e-09	1.19235	0.250399	1.91889e-06	1.22006	0.155144	3.71913e-15	-0.022614	0.0124439	0.0691998	0.267273	0.0385194	4.99553e-12
CTGCACA	-76	-0.400151	0.106119	0.000162747	-0.498496	0.100938	7.8678e-07	0.0716008	0.0593084	0.227331	0.0426753	0.00756332	1.71388e-08	0.0053111	0.014625	0.716521
TTCACCT	-25	-0.561715	0.127943	1.13165e-05	-0.560158	0.122941	5.20607e-06	-0.358324	0.0724265	7.52048e-07	0.0139906	0.00948934	0.140413	-0.0826093	0.0181157	5.35337e-06
TCAGCCA	-18	1.266	0.263354	1.53048e-06	0.989657	0.250778	7.93535e-05	1.06916	0.208454	2.91293e-07	0.0164782	0.0134179	0.219442	0.226844	0.0378419	2.32818e-09
GTCCCCA	-243	-0.484279	0.103883	3.1349e-06	-0.230174	0.0981996	0.0190811	-0.0296052	0.0589608	0.615586	0.046396	0.00743641	4.54694e-10	-0.0185465	0.0144881	0.200619
TAAATCA	48	0.966629	0.223813	1.568e-05	0.644894	0.213491	0.0025218	-0.142262	0.141495	0.314693	-0.0396433	0.0197298	0.0445263	-0.00607204	0.034154	0.858907
				p<0.001			Overlaps predicted PRDM9 binding motif				Effect in same direction to hotspot effect
				p<0.05			Does not overlap predicted PRDM9 binding motif				Effect in opposite direction to hotspot effect
				aFor 0-1 phenotypes, testing used the Binomial family for the generalised linear model framework. The estimate shows the increase in the log-odds of hotspot/binding probability, when the stated motif is present in a THE1B element
				bFor H3K4me3 read counts, testing used the quasi-Poisson family for the generalised linear model framework. The estimate shows the increase in the log total H3K4me3 read depth (i.e. log of effect on amount of H3K4me3 present), when the stated motif is present in a THE1B element
				cThe position is estimated by examining THE1B elements with the 14-bp motif CCTCCC[CT]AGCCA[CT]G and among THE1B elements matches to the defined 7-bp motif, gives the most common position relative to the 14-bp motif.
				dMotifs shown possess significant evidence of association with hotspot status conditional on PRDM9 binding, after Bonferroni correction for 2021 tests performed (see Supplementary Methods for more details)

## Sheet: PRDM9 binding
	Position relative to PRDM9 binding motif in THE1Bc	Pratto hotspots given bindinga			LD-based hotspots given bindinga			PRDM9 binding to THE1B elementsa,d			H3K4me3 without PRDM9 bindingb			H3K4me3 at bound THE1B elementsb
Motif		Estimate	Std. Error	Pr(>|z|)	Estimate	Std. Error	Pr(>|z|)	Estimate	Std. Error	Pr(>|z|)	Estimate	Std. Error	Pr(>|t|)	Estimate	Std. Error	Pr(>|t|)
(Intercept)	1	-2.79009	0.399277	2.79109e-12	-2.01932	0.369733	4.71989e-08	-4.84613	0.208577	2.05168e-119	4.37002	0.00807292	0	4.28585	0.0552378	0
CCTCCCTAGCCACG	1	2.94814	0.350183	3.80157e-17	2.87829	0.356997	7.47529e-16	3.6409	0.50026	3.38778e-13	-	-	-	0.766124	0.0440142	3.26057e-64
CCTCCCTAGCCATG	1	1.86464	0.153945	9.08508e-34	1.35991	0.14679	1.96236e-20	3.90058	0.224625	1.52408e-67	-	-	-	0.474192	0.0218884	1.1108e-95
CCTCCCCAGCCACG	1	1.65111	0.179462	3.56979e-20	1.28912	0.171479	5.57694e-14	1.38118	0.117811	9.63117e-32	-	-	-	0.287745	0.0260928	1.16996e-27
TGAGGCC	-5	0.676416	0.251901	0.00724768	0.571615	0.243961	0.0191265	1.09454	0.151076	4.32683e-13	-0.0264387	0.0102778	0.0101109	0.144026	0.0384301	0.000182396
GTGGAAC	13	0.375377	0.137712	0.00641424	0.37401	0.132249	0.004683	1.12793	0.0780465	2.43368e-47	-0.0085917	0.00788706	0.276025	0.107178	0.0196112	5.07307e-08
CCATGAC	-14	-0.735087	0.425075	0.0837535	-0.322441	0.40806	0.429422	-1.59055	0.239436	3.07601e-11	0.0247235	0.0200024	0.216473	-0.300999	0.0701593	1.85142e-05
TGAAGCC	-5	0.390396	0.410768	0.341906	-0.525307	0.408309	0.198254	2.89356	0.24335	1.32603e-32	0.00227133	0.0246574	0.926608	0.138936	0.0572624	0.0153226
TTGTGAG	-8	-0.523103	0.147932	0.000406087	-0.505649	0.140685	0.000325391	0.918408	0.0923486	2.65155e-23	0.0243548	0.00866139	0.00493298	-0.0394795	0.022126	0.0744931
ACCTTCC	-22	-0.061939	0.155714	0.690796	-0.0424874	0.150692	0.777982	-0.701963	0.103038	9.58103e-12	-0.0134629	0.0124059	0.277853	-0.0514204	0.0240506	0.0326104
GGCCTCC	-2	0.385458	0.396529	0.331012	-0.00816249	0.37218	0.982503	1.55355	0.212119	2.40751e-13	0.00805006	0.0106876	0.451334	0.00351326	0.0564634	0.950391
CCATGAT	-14	-0.288974	0.112944	0.0105103	-0.149867	0.108318	0.166484	0.370437	0.0736694	4.9468e-07	0.0290038	0.00822622	0.000423773	-0.0218026	0.0165646	0.188221
CCACGTG	9	0.400705	0.173477	0.0208966	0.180998	0.164209	0.270356	0.55844	0.100456	2.71248e-08	-0.0253732	0.00964172	0.0085087	0.0256482	0.0243648	0.292589
TCCATCA	-18	-0.240197	0.426578	0.573381	-0.000305689	0.403535	0.999396	-1.32782	0.247463	8.06247e-08	0.00827769	0.0230181	0.71914	-0.0978508	0.0665022	0.141308
GTGGAAT	13	0.350126	0.278117	0.208061	0.763508	0.251735	0.0024215	0.991632	0.175847	1.70861e-08	0.0107741	0.0231244	0.64128	0.144412	0.0391141	0.000227087
GTCATGA	-15	-0.697881	0.309918	0.0243334	-0.174227	0.273803	0.524566	-0.799739	0.168911	2.19418e-06	0.0428762	0.0186869	0.0217812	-0.0334968	0.040814	0.411884
TCAGCCA	-18	1.29454	0.260955	7.02172e-07	0.99718	0.247916	5.76464e-05	1.13621	0.240978	2.41703e-06	0.0156356	0.0136687	0.252688	0.219375	0.0385313	1.38747e-08
TGGAAAT	14	-0.100767	0.322367	0.754597	0.0970487	0.294127	0.741434	0.871434	0.204169	1.97056e-05	0.068669	0.0223212	0.00209977	0.143938	0.0427766	0.000777098
Correlation p-valuee		2.8x10-5			0.028			-			0.22			8.0x10-5
				p<0.001			Overlaps predicted PRDM9 binding motif				Effect in same direction to PRDM9 binding
				p<0.05			Does not overlap predicted PRDM9 binding motif				Effect in opposite direction to PRDM9 binding
				aFor 0-1 phenotypes, testing used the Binomial family for the generalised linear model framework. The estimate shows the increase in the log-odds of hotspot/binding probability, when the stated motif is present in a THE1B element
				bFor H3K4me3 read counts, testing used the quasi-Poisson family for the generalised linear model framework. The estimate shows the increase in the log total H3K4me3 read depth (i.e. log of effect on amount of H3K4me3 present), when the stated motif is present in a THE1B element
				cThe position is estimated by examining THE1B elements with the 14-bp motif CCTCCC[CT]AGCCA[CT]G and among THE1B elements matches to the defined 7-bp motif, gives the most common position relative to the 14-bp motif.
				dMotifs shown posssess evidence of significant association with PRDM9 binding, after Bonferroni correction for 2021 tests performed (see Supplementary Methods for more details)
				eRank correlation test versus the strength of binding signal, to test evidence for effects in a common direction for binding, meiotic H3K4me3 signal at bound THE1B, and meiotic recombination (hotspots). Note no significant correlation was seen for unbound THE1B elements when tested.

## Sheet: H3K4me3 in unbound THE1B's
	Position relative to PRDM9 binding motif in THE1Bc	Pratto hotspots given bindinga			LD-based hotspots given bindinga			PRDM9 binding to THE1B elementsa,d			H3K4me3 without PRDM9 bindingb			H3K4me3 at bound THE1B elementsb			ROADMAP example cell type E016 (embryonic cell) data heterochromatin (9_Het) annotation			TRIM28 binding in human embryonic stem cells			Binding site target sequences associated with motif
Motif		Estimate	Std. Error	Pr(>|z|)	Estimate	Std. Error	Pr(>|z|)	Estimate	Std. Error	Pr(>|z|)	Estimate	Std. Error	Pr(>|t|)	Estimate	Std. Error	Pr(>|t|)	Estimate	Std. Error	Pr(>|t|)	Estimate	Std. Error	Pr(>|t|)
(Intercept)	1	-1.77447	0.14754	2.56157e-33	-1.34524	0.137547	1.36831e-22	-0.46378	0.0811585	1.1003e-08	4.35161	0.00863504	0	4.48099	0.0212971	0	-1.25366	0.0418301	2.39568e-197	-3.37324	0.0800638	0
CCTCCCTAGCCACG	1	3.324	0.324064	1.09803e-24	3.12212	0.339717	3.91512e-20	2.8393	0.432019	4.9589e-11	-	-	-	0.73299	0.0391529	2.22232e-73
CCTCCCTAGCCATG	1	1.74846	0.14862	5.94101e-32	1.29857	0.143096	1.13873e-19	2.89117	0.191563	1.81404e-51	-	-	-	0.425787	0.021355	2.5799e-82
CCTCCCCAGCCACG	1	1.98338	0.117775	1.23522e-63	1.45047	0.110266	1.6078e-39	1.40011	0.0753794	5.2019e-77	-	-	-	0.296094	0.0170219	3.94257e-64
ATCCATG	-52	-0.790603	0.197439	6.22056e-05	-0.905094	0.201189	6.83595e-06	0.168812	0.103243	0.10203	0.116712	0.0110127	3.94576e-26	0.104559	0.02445	1.96894e-05	0.663309	0.0499234	2.77116e-40	0.547871	0.0793919	5.16962e-12	TRIM28
AGATGTG	-43	-0.198646	0.115059	0.084263	-0.281434	0.110244	0.0106853	0.00979575	0.0667443	0.883317	0.0544462	0.00848449	1.43948e-10	0.036854	0.0165838	0.0263511	0.255482	0.0393193	8.15963e-11	0.47571	0.065986	5.62602e-13	TRIM28;ZNF100;ZNF430
TATAAAT	47	0.0371206	0.112174	0.740704	0.033039	0.106809	0.757072	-0.0451444	0.0641508	0.481605	-0.0578215	0.0084375	7.58035e-12	-0.0147111	0.0164199	0.370374	-0.343215	0.0404802	2.27953e-17	-0.218889	0.0699642	0.00175653	ZNF766
CACGAGA	-111	0.210989	0.138265	0.127016	-0.204357	0.138395	0.139777	0.230115	0.0837846	0.00602336	-0.0794581	0.0119799	3.43622e-11	-0.0422875	0.0210424	0.0445758	-0.475893	0.0604538	3.49005e-15	-0.140383	0.0967827	0.146919
ACCCAAA	-237	-0.18477	0.104374	0.0766842	-0.114732	0.100112	0.251778	-0.0422805	0.0603438	0.483515	0.0518689	0.00755485	6.93706e-12	0.00205126	0.0151906	0.892595	-0.0270753	0.0358942	0.450664	-0.130516	0.0604999	0.0309825
TTTCCCC	-148	0.348694	0.135711	0.010188	0.427651	0.130269	0.00102768	-0.0106985	0.0833808	0.897905	-0.0838053	0.0107841	8.38859e-15	0.00629292	0.0204148	0.757915	-0.492535	0.0533369	2.59714e-20	-0.962812	0.099467	3.67752e-22
TGAATAC	-122	0.308864	0.277174	0.265136	0.130351	0.271036	0.630562	0.100448	0.168094	0.550125	-0.138459	0.0224049	6.61813e-10	-0.0323389	0.0421027	0.442502	-0.286619	0.1102	0.00929773	-0.22002	0.187932	0.241703
ACATGAC	-43	-0.205397	0.220981	0.352641	-0.537976	0.223545	0.0161033	-0.0967092	0.117119	0.408954	0.0624782	0.0139208	7.25051e-06	0.0531567	0.0297289	0.0738873	0.173831	0.0658791	0.00832416	0.21525	0.107971	0.0461973	ZNF100;ZNF430;TRIM28
TGTCCCC	-244	-0.396208	0.10274	0.000115072	-0.159488	0.0984161	0.105114	-0.00358705	0.0590131	0.951531	0.0427818	0.00744035	9.13792e-09	-0.0120069	0.0149074	0.420644	-0.0594127	0.0354244	0.09351	-0.0809811	0.0599393	0.176679
GGGGCGG	-156	0.0535828	0.19919	0.787927	0.229982	0.18536	0.214704	-0.0634926	0.113067	0.574423	-0.0754755	0.0165767	5.33683e-06	-0.0407252	0.0300606	0.175612	-0.474701	0.0849043	2.25752e-08	-0.190672	0.136303	0.16185
TAAGACG	-47	0.149453	0.170673	0.381209	-0.121126	0.167278	0.469004	0.0551216	0.100033	0.581611	-0.0763007	0.0138284	3.50423e-08	-0.0218584	0.0259193	0.399125	-0.653995	0.0737524	7.48516e-19	-0.691406	0.134476	2.72583e-07	TRIM28
CAGCGTG	81	0.0578764	0.173108	0.738126	0.051797	0.166981	0.756411	0.141093	0.1059	0.182754	-0.066014	0.0148783	9.20419e-06	-0.00811061	0.0254114	0.749622	-0.551132	0.0775003	1.14915e-12	-0.507584	0.135653	0.000182714
ATTGTAG	-219	0.0871152	0.112372	0.438196	0.203761	0.106629	0.0560135	0.00627177	0.0657133	0.923964	-0.043942	0.00909178	1.36002e-06	-0.0465102	0.016785	0.00562995	-0.275665	0.0444118	5.39963e-10	-0.170361	0.0764624	0.0258779
ACATGCT	-72	-0.495622	0.209506	0.0179973	-0.222758	0.185507	0.229826	-0.00402204	0.101045	0.968249	0.062192	0.0136983	5.67551e-06	0.0332709	0.0267849	0.214294	0.242547	0.0636905	0.000139972	0.594085	0.0953398	4.62777e-10	TRIM28
GTTTCCC	-77	-0.248278	0.121244	0.0405846	-0.275663	0.117478	0.01895	-0.071624	0.0712206	0.314577	0.040215	0.00863224	3.2154e-06	-0.00359888	0.0174091	0.836242	0.379936	0.0402066	3.40163e-21	0.723708	0.0649955	8.49918e-29	TRIM28
TTTAGCT	-217	-0.190258	0.285323	0.504889	-0.772732	0.314653	0.0140564	-0.24912	0.154468	0.106796	0.080469	0.018394	1.22578e-05	0.0654489	0.038925	0.0928059	0.229026	0.0875275	0.00888054	-0.0222102	0.15999	0.889591
TGTAAGA	-49	0.12986	0.114447	0.256515	-0.100593	0.108662	0.35458	-0.084183	0.0652686	0.197122	0.0373912	0.00856085	1.26588e-05	0.0269702	0.016571	0.103743	0.257202	0.0398501	1.08765e-10	0.763272	0.0703157	1.88956e-27	TRIM28;ZNF100;ZNF430
CGCCATG	Either -16 or -52	0.153732	0.152688	0.314012	0.135945	0.14641	0.353138	-0.300973	0.0896178	0.000783942	-0.0559414	0.0128041	1.25829e-05	0.0115851	0.0231516	0.616837	-0.224526	0.060915	0.000227909	0.697629	0.0809618	6.88677e-18	TRIM28; ZNF100; ZNF430; YY1
Correlation p-valuee		<2.2x10-16			0.00036			0.25			-			0.00036			4.38e-05
			p<0.001			Overlaps predicted PRDM9 binding motif					Effect in same direction to H3K4me3 without binding
			p<0.05			Does not overlap predicted PRDM9 binding motif					Effect in opposite direction to H3K4me3 without binding
				aFor 0-1 phenotypes, testing used the Binomial family for the generalised linear model framework. The estimate shows the increase in the log-odds of hotspot/binding probability, when the stated motif is present in a THE1B element
				bFor H3K4me3 read counts, testing used the quasi-Poisson family for the generalised linear model framework. The estimate shows the increase in the log total H3K4me3 read depth (i.e. log of effect on amount of H3K4me3 present), when the stated motif is present in a THE1B element
				cThe position is estimated by examining THE1B elements with the 14-bp motif CCTCCC[CT]AGCCA[CT]G and among THE1B elements matches to the defined 7-bp motif, gives the most common position relative to the 14-bp motif.
				dMotifs shown posssess evidence of significant association with H3K4me3 in THE1B elements not bound by PRDM9, after Bonferroni correction for 2021 tests performed (see Supplementary Methods for more details)
				eRank correlation test versus the strength of H3K4me3 signal, to examine evidence for correlation between H3K4me3 marks present independently of PRDM9 binding in testes, PRDM9 binding, meiotic recombination (hotspots), and H3K4me3 at sites bound by PRDM9. Note strong negative correlation with recombination, positive correlation with H3K4me3 across bound THE1B elements, and Heterochromatin (H3K9me…

## Sheet: ROADMAP motifs
Motif	Position	ROADMAP cell type	Chromatin state	Estimate	Std. Error	Pr(>|z|)
ATCCATG	-52	E001	15_Quies	-0.505896	0.0446936	1.05406e-29			p<2.5x10-8			Overlaps predicted PRDM9 binding motif
TTCCCTG	-75	E001	15_Quies	-0.351345	0.037373	5.40316e-21						Does not overlap predicted PRDM9 binding motif
ATTGAAT	-167	E001	15_Quies	0.212671	0.0310127	7.00542e-12
CTCCTCC	-31	E001	15_Quies	-0.233963	0.035987	7.96235e-11
ATCCATG	-52	E001	9_Het	0.468817	0.0583174	9.05306e-16
TTCCCTG	-75	E001	9_Het	0.461759	0.0437927	5.40412e-26
AAGACGT	-46	E001	9_Het	-0.603008	0.079819	4.19865e-14
AGATGTG	-43	E001	9_Het	0.31601	0.041104	1.49393e-14
CCACGTG	9	E001	9_Het	-0.279744	0.0471024	2.8665e-09
CATGCCT	-32	E001	9_Het	0.425843	0.0644803	3.99601e-11
TTATAAA	-94	E001	9_Het	-0.351875	0.0430057	2.79084e-16
CCATGTA	-52	E001	9_Het	0.32949	0.0442577	9.70826e-14
TTCCCCC	-147	E001	9_Het	-0.388708	0.0623448	4.52317e-10
CTGAATC	-166	E001	5_TxWk	0.508453	0.0721226	1.79116e-12
CCCACGT	-200	E001	5_TxWk	0.469957	0.0726542	9.90418e-11
AGACGTG	-45	E001	5_TxWk	0.49679	0.0774559	1.41891e-10
CCGCCAT	-17	E001	5_TxWk	0.437173	0.0749545	5.46003e-09
CGAGATC	-109	E001	5_TxWk	0.435195	0.0764828	1.26966e-08
ATCCATG	-52	E001	8_ZNF/Rpts	0.9739	0.148996	6.30087e-11
CCGCCAT	-17	E002	15_Quies	-0.38374	0.0594065	1.05007e-10
TTTCCCT	-76	E002	9_Het	0.524757	0.0852706	7.55409e-10
GCCATCC	-55	E002	9_Het	0.552373	0.0936408	3.66045e-09
CTGAATC	-166	E002	5_TxWk	0.862594	0.0895484	5.81739e-22
TTCCGCC	-19	E002	5_TxWk	0.708285	0.118966	2.62178e-09
ATCCATG	-52	E003	15_Quies	-0.432854	0.0455318	1.9693e-21
TCCCTGC	-74	E003	15_Quies	-0.353726	0.0392838	2.1689e-19
CTTTATA	43	E003	15_Quies	0.281533	0.035556	2.4131e-15
ATTGAAT	-167	E003	15_Quies	0.210368	0.0318422	3.93342e-11
ATCCATG	-52	E003	9_Het	0.689085	0.0514177	5.90801e-41
TCCCTGC	-74	E003	9_Het	0.468613	0.0458849	1.7376e-24
AAGACGT	-46	E003	9_Het	-0.613072	0.0829397	1.44877e-13
CCACGTG	9	E003	9_Het	-0.371345	0.0507335	2.48866e-13
TATAAAT	47	E003	9_Het	-0.376204	0.044037	1.30887e-17
TCACGAG	-112	E003	9_Het	-0.509588	0.0699427	3.19784e-13
AGCGTGA	82	E003	9_Het	-0.574086	0.0903353	2.08345e-10
TTCCCGT	-145	E003	9_Het	-0.653856	0.11245	6.07575e-09
TAAGACG	-47	E003	5_TxWk	0.545265	0.0856338	1.92245e-10
ACTGAAT	-167	E003	5_TxWk	0.488213	0.0760143	1.33923e-10
ACTGAAT	-167	E003	4_Tx	1.06743	0.127192	4.76959e-17
CCTTCCG	-21	E003	4_Tx	1.18039	0.164702	7.67497e-13
ATCCATG	-52	E003	8_ZNF/Rpts	0.873989	0.136109	1.35162e-10
TCACGAG	-112	E006	15_Quies	-0.33804	0.0434877	7.65043e-15
ACGTGCC	-33	E006	15_Quies	-0.439448	0.0660107	2.79043e-11
AGTCTCG	58	E006	15_Quies	-0.277836	0.0463266	2.00577e-09
CGCCATG	-16	E006	15_Quies	-0.28102	0.0463318	1.31638e-09
GCGTGAA	83	E006	15_Quies	-0.377246	0.0658367	1.00416e-08
ACGTGCC	-33	E006	14_ReprPCWk	0.554954	0.0920031	1.62042e-09
ATCCATG	-52	E006	9_Het	0.45024	0.0593013	3.13981e-14
TTCCCTG	-75	E006	9_Het	0.311028	0.0536443	6.71265e-09
TCACGAG	-112	E006	5_TxWk	0.560579	0.0580767	4.80227e-22
CCGCCAT	-17	E006	5_TxWk	0.503838	0.0597492	3.3821e-17
ATTGAAT	-167	E006	5_TxWk	-0.341481	0.0441911	1.09798e-14
CGGGTAT	63	E006	5_TxWk	0.428387	0.0687622	4.66503e-10
CGTGCCT	-32	E006	5_TxWk	0.502935	0.0874258	8.78223e-09
AATAAGT	-120	E006	5_TxWk	-0.257805	0.0446634	7.82522e-09
ACTGAAT	-167	E006	4_Tx	1.10513	0.144438	1.99021e-14
CCTTCCG	-21	E006	4_Tx	1.17075	0.187887	4.63065e-10
ACTGAAT	-167	E007	15_Quies	-0.373029	0.0529539	1.86232e-12
CCGCCAT	-17	E007	15_Quies	-0.38492	0.0571723	1.66607e-11
TGACTTT	-40	E007	15_Quies	0.384622	0.0685244	1.98938e-08
CGAGATC	-109	E007	15_Quies	-0.354764	0.0586966	1.50312e-09
ATCCATG	-52	E007	9_Het	0.73279	0.0770776	1.95909e-21
CCGCCAT	-17	E007	5_TxWk	0.506074	0.0705738	7.45342e-13
CTGAATC	-166	E007	5_TxWk	0.485129	0.0695345	3.01972e-12
ACGAGAT	-110	E007	5_TxWk	0.477747	0.0715107	2.37692e-11
TCCCACG	-201	E007	5_TxWk	0.450443	0.0751654	2.06402e-09
ATCCATG	-52	E008	15_Quies	-0.328855	0.0518517	2.2648e-10
CCGCCAT	-17	E008	15_Quies	-0.344139	0.0548755	3.5813e-10
ATCCATG	-52	E008	9_Het	0.722326	0.0688615	9.64867e-26
TCCCTGC	-74	E008	9_Het	0.391601	0.0660898	3.11753e-09
ACTGAAT	-167	E008	5_TxWk	0.573566	0.0691651	1.10696e-16
CCGCCAT	-17	E008	5_TxWk	0.495027	0.0752449	4.74034e-11
GCGTGAA	83	E008	5_TxWk	0.630272	0.103809	1.26742e-09
CACGAGA	-111	E009	15_Quies	-0.355526	0.0464734	2.00832e-14
ACTGAAT	-167	E009	15_Quies	-0.327639	0.0436107	5.7868e-14
CCGCCAT	-17	E009	15_Quies	-0.318639	0.0472476	1.54061e-11
GTCTCGG	59	E009	15_Quies	-0.318538	0.0526799	1.47865e-09
AACGGAC	90	E009	15_Quies	-0.360914	0.063504	1.32105e-08
ACGAGAT	-110	E009	14_ReprPCWk	0.468722	0.0661558	1.38915e-12
TACGTCT	67	E009	14_ReprPCWk	0.680542	0.12109	1.90811e-08
ATCCATG	-52	E009	9_Het	0.624008	0.0624033	1.53022e-23
AGATGTG	-43	E009	9_Het	0.514453	0.0562894	6.27862e-20
AGACATG	-45	E009	9_Het	0.433942	0.0670487	9.66895e-11
TAAGACG	-47	E009	5_TxWk	0.668489	0.10277	7.78396e-11
ACTGAAT	-167	E009	5_TxWk	0.595641	0.0922135	1.05145e-10
CTGAATC	-166	E009	4_Tx	0.952807	0.111122	9.95953e-18
AGCGTGA	82	E009	4_Tx	0.818809	0.136673	2.08521e-09
TCCGCCA	-18	E009	4_Tx	0.816944	0.146522	2.46705e-08
CATCCAT	-53	E009	8_ZNF/Rpts	0.843954	0.123466	8.17173e-12
TCTCACG	-114	E010	15_Quies	-0.402105	0.0441239	8.00716e-20
CCGCCAT	-17	E010	15_Quies	-0.317258	0.046903	1.34117e-11
ACTGAAT	-167	E010	15_Quies	-0.285831	0.0435145	5.07811e-11
AGCAGCG	79	E010	15_Quies	-0.344823	0.0573935	1.87758e-09
GACGTGC	-34	E010	15_Quies	-0.42182	0.0690038	9.77818e-10
CTCGGGT	61	E010	15_Quies	-0.299833	0.0537118	2.37425e-08
AATAAGT	-120	E010	15_Quies	0.186493	0.0320351	5.83204e-09
CGAGATC	-109	E010	14_ReprPCWk	0.42807	0.059805	8.20102e-13
GGCGGTT	-153	E010	14_ReprPCWk	0.616299	0.102568	1.87048e-09
ATCCATG	-52	E010	9_Het	0.665241	0.0807635	1.76728e-16
ACTGAAT	-167	E010	5_TxWk	0.468222	0.0791938	3.37244e-09
CGCCATG	-16	E010	5_TxWk	0.490055	0.0872592	1.9533e-08
ACTGAAT	-167	E010	4_Tx	1.05034	0.103047	2.13364e-24
CTCATGA	-113	E010	4_Tx	-0.599613	0.0999665	1.99589e-09
CCATCCA	-54	E010	8_ZNF/Rpts	0.846794	0.137907	8.23586e-10
ACTGAAT	-167	E010	8_ZNF/Rpts	0.88478	0.148999	2.88261e-09
ATCCATG	-52	E011	15_Quies	-0.485038	0.0433197	4.23187e-29
TTCCCTG	-75	E011	15_Quies	-0.248442	0.0361997	6.73804e-12
TTTATAA	-95	E011	15_Quies	0.205841	0.0307367	2.12867e-11
GATGTGC	-34	E011	15_Quies	-0.250537	0.0447129	2.10366e-08
AGGTAAC	-172	E011	15_Quies	-0.338464	0.057237	3.35161e-09
TACGTCT	67	E011	14_ReprPCWk	1.23969	0.128208	4.06797e-22
ATCCATG	-52	E011	9_Het	0.444671	0.0534381	8.70429e-17
AAGACGT	-46	E011	9_Het	-0.799151	0.0750024	1.65238e-26
TTCCCTG	-75	E011	9_Het	0.339384	0.0425849	1.59203e-15
TCACGAG	-112	E011	9_Het	-0.405322	0.0600275	1.45537e-11
CCACGTG	9	E011	9_Het	-0.311603	0.0448273	3.622e-12
TGTAAGA	-49	E011	9_Het	0.276119	0.0392762	2.06262e-12
TTATAAA	-94	E011	9_Het	-0.290127	0.0407694	1.10866e-12
GATGTGC	-34	E011	9_Het	0.351275	0.0535267	5.28745e-11
AAGACGT	-46	E011	5_TxWk	0.609021	0.0870089	2.56834e-12
CACGAGA	-111	E011	5_TxWk	0.48445	0.0824424	4.1973e-09
AAACGGA	89	E011	5_TxWk	0.648726	0.107837	1.79021e-09
ATCCATG	-52	E011	5_TxWk	-0.637084	0.113217	1.83247e-08
ACTGAAT	-167	E011	4_Tx	1.08432	0.1131	9.0448e-22
ATCCATG	-52	E011	8_ZNF/Rpts	0.627264	0.0813993	1.29806e-14
TCCCTGC	-74	E011	8_ZNF/Rpts	0.495085	0.076281	8.56776e-11
TAACTGA	-169	E012	15_Quies	-0.501763	0.0553475	1.23824e-19
TATAAAT	47	E012	15_Quies	0.254232	0.0403759	3.04197e-10
ATCCATG	-52	E012	9_Het	0.720933	0.0811268	6.30673e-19
TAACTGA	-169	E012	5_TxWk	0.753985	0.0719185	1.02453e-25
ACTGAAT	-167	E012	4_Tx	0.960627	0.128874	9.05585e-14
CCTTCCG	-21	E012	4_Tx	1.02121	0.172179	3.00903e-09
ATCCATG	-52	E013	15_Quies	-0.320039	0.0528958	1.44503e-09
TCCCTGC	-74	E013	15_Quies	-0.241096	0.038658	4.47091e-10
ATGTGCC	-33	E013	15_Quies	-0.442076	0.0466984	2.89038e-21
ACTGAAT	-167	E013	15_Quies	-0.286986	0.041704	5.9227e-12
TGACTTG	-38	E013	15_Quies	-0.242201	0.043326	2.26809e-08
CATGCCT	-32	E013	15_Quies	-0.35931	0.0523834	6.92347e-12
CCATGTA	-52	E013	15_Quies	-0.273775	0.0348516	3.98337e-15
TTTATAA	-95	E013	15_Quies	0.247871	0.035136	1.73086e-12
CATGACT	-13	E013	15_Quies	-0.264159	0.0473096	2.35569e-08
ATCCATG	-52	E013	9_Het	0.411558	0.0600739	7.34046e-12
AGATGTG	-43	E013	9_Het	0.3611	0.040791	8.56278e-19
AGACATG	-45	E013	9_Het	0.304705	0.0481381	2.45475e-10
TTCCCTG	-75	E013	9_Het	0.361338	0.0423158	1.35296e-17
TTCTCGT	-134	E013	9_Het	-0.381556	0.0596292	1.56603e-10
TAAGACG	-47	E013	9_Het	-0.612034	0.0751996	3.99211e-16
CATGTAA	-51	E013	9_Het	0.389581	0.0415612	7.00554e-21
TTTATAA	-95	E013	9_Het	-0.333617	0.0408441	3.13374e-16
GCCTTTG	-39	E013	9_Het	0.383234	0.058893	7.65215e-11
GCCTCCC	-1	E013	9_Het	-0.213899	0.0360371	2.92924e-09
TCTCACG	-114	E013	9_Het	-0.337375	0.0563091	2.07939e-09
AACTGAA	-168	E013	5_TxWk	0.587464	0.0900019	6.69897e-11
GACGTGC	-34	E013	5_TxWk	0.688024	0.122055	1.73016e-08
ACTGAAT	-167	E013	4_Tx	0.992297	0.0934049	2.31438e-26
CCGCCAT	-17	E013	4_Tx	0.717985	0.104354	5.97427e-12
CATCCAT	-53	E013	8_ZNF/Rpts	0.785861	0.125198	3.45255e-10
TTTATAA	-95	E014	15_Quies	0.207841	0.0346795	2.05758e-09
TCCCTGC	-74	E014	15_Quies	-0.376932	0.0384983	1.23236e-22
ATCCATG	-52	E014	15_Quies	-0.356865	0.0443689	8.7564e-16
ATTGAAT	-167	E014	15_Quies	0.202762	0.0310655	6.71302e-11
ATCCATG	-52	E014	9_Het	0.443203	0.0536104	1.37259e-16
TTCCCTG	-75	E014	9_Het	0.474602	0.043341	6.61294e-28
TTTATAA	-95	E014	9_Het	-0.324508	0.043716	1.14402e-13
CCACGTG	9	E014	9_Het	-0.360299	0.0480686	6.60357e-14
AAGACGT	-46	E014	9_Het	-0.65714	0.0756033	3.56254e-18
CACGAGA	-111	E014	9_Het	-0.469059	0.0658553	1.05929e-12
AGCGTGA	82	E014	9_Het	-0.632017	0.0865262	2.78631e-13
GTCTCGG	59	E014	9_Het	-0.479517	0.0744563	1.19281e-10
TTCTCGT	-134	E014	9_Het	-0.402457	0.0651793	6.63263e-10
TTTTGTA	43	E014	9_Het	0.287233	0.0452917	2.27013e-10
CGGACTA	92	E014	9_Het	-0.572748	0.096093	2.51693e-09
TGTAAGA	-49	E014	9_Het	0.237791	0.0414318	9.50405e-09
TTGTAGC	-218	E014	9_Het	-0.28736	0.0445278	1.09309e-10
TTTCCCA	-146	E014	9_Het	0.236774	0.0418017	1.47688e-08
CTGAATC	-166	E014	5_TxWk	0.690778	0.0774918	4.91293e-19
AGACGTG	-45	E014	5_TxWk	0.55214	0.0851617	8.966e-11
TCCCACG	-201	E014	5_TxWk	0.525112	0.0863136	1.17389e-09
CTCATGA	-113	E014	5_TxWk	-0.388428	0.0640475	1.32214e-09
ATTGAAT	-167	E014	4_Tx	-0.815182	0.133335	9.73022e-10
CCTTCCG	-21	E014	4_Tx	1.05809	0.166542	2.10749e-10
CAGGTCT	-157	E014	8_ZNF/Rpts	0.935005	0.163816	1.14539e-08
ATCCATG	-52	E015	15_Quies	-0.580945	0.0482857	2.42987e-33
TCCCTGC	-74	E015	15_Quies	-0.511095	0.0378552	1.53635e-41
TTTATAA	-95	E015	15_Quies	0.317309	0.0334971	2.72572e-21
ATGTGCC	-33	E015	15_Quies	-0.520806	0.045403	1.85066e-30
TGTAAGA	-49	E015	15_Quies	-0.257064	0.0318596	7.107e-16
GATAATT	-170	E015	15_Quies	0.272133	0.0382661	1.14707e-12
AGACATG	-45	E015	15_Quies	-0.247998	0.0384992	1.18192e-10
TTGCTCC	-35	E015	15_Quies	-0.237866	0.0320539	1.16392e-13
TGTGAGT	20	E015	15_Quies	0.19183	0.0322302	2.65119e-09
GGAGTTT	-90	E015	14_ReprPCWk	-0.830614	0.130457	1.92808e-10
ATCCATG	-52	E015	9_Het	0.49448	0.053569	2.68832e-20
TTCCCTG	-75	E015	9_Het	0.422435	0.0455447	1.77342e-20
AAGACGT	-46	E015	9_Het	-0.772706	0.061972	1.107e-35
ATGTGCC	-33	E015	9_Het	0.631064	0.0479397	1.41953e-39
TTCCCCC	-147	E015	9_Het	-0.426986	0.0507158	3.79106e-17
TGTAAGA	-49	E015	9_Het	0.45137	0.0351043	7.75776e-38
TTTATAA	-95	E015	9_Het	-0.295469	0.0376523	4.25083e-15
CCACGTG	9	E015	9_Het	-0.315954	0.0388981	4.56233e-16
TTGCTCC	-35	E015	9_Het	0.281286	0.0346858	5.08136e-16
TCACGAG	-112	E015	9_Het	-0.376182	0.051095	1.80626e-13
AGCGTGA	82	E015	9_Het	-0.462391	0.0648779	1.02507e-12
TTTTGTA	43	E015	9_Het	0.25377	0.0399011	2.01792e-10
ACCCGGT	-182	E015	9_Het	-0.487718	0.0733986	3.03648e-11
CATGCCT	-32	E015	9_Het	0.397509	0.0541671	2.15895e-13
TTCTCGT	-134	E015	9_Het	-0.311684	0.0510538	1.02799e-09
TGAATTG	-222	E015	9_Het	-0.202938	0.0336064	1.554e-09
AGTTTCC	-78	E015	9_Het	0.243307	0.0422187	8.26196e-09
GTCTCGG	59	E015	9_Het	-0.328694	0.0574371	1.04858e-08
TAACTGA	-169	E015	5_TxWk	0.644534	0.0876384	1.9168e-13
TAAGACG	-47	E015	5_TxWk	0.693787	0.0909832	2.4321e-14
CATCCAT	-53	E015	5_TxWk	-0.907032	0.138347	5.51955e-11
CACGAGA	-111	E015	5_TxWk	0.498114	0.0879283	1.47021e-08
CTGAATC	-166	E015	4_Tx	1.07649	0.120857	5.23658e-19
CCTTCCG	-21	E015	4_Tx	0.966217	0.161061	1.98465e-09
AATAAGT	-120	E015	4_Tx	-0.661509	0.11413	6.78756e-09
ATCCATG	-52	E015	8_ZNF/Rpts	1.08495	0.106024	1.41101e-24
ATCCATG	-52	E016	15_Quies	-0.532206	0.0446643	9.80473e-33
TCCCTGC	-74	E016	15_Quies	-0.361052	0.0377234	1.05818e-21
TTTATAA	-95	E016	15_Quies	0.235448	0.0331426	1.21097e-12
GTAACTG	-170	E016	15_Quies	-0.360981	0.0549939	5.23764e-11
ATGTGCC	-33	E016	15_Quies	-0.300714	0.0462515	7.94029e-11
TGCTCCT	-34	E016	15_Quies	-0.213958	0.0328644	7.49923e-11
TTTCCTT	39	E016	15_Quies	0.240106	0.0391166	8.34551e-10
TCTTGAG	60	E016	14_ReprPCWk	1.70464	0.202029	3.23871e-17
ATCCATG	-52	E016	9_Het	0.476169	0.057107	7.54308e-17
TTCCCTG	-75	E016	9_Het	0.429369	0.0417799	8.95318e-25
AAGACGT	-46	E016	9_Het	-0.723271	0.0719154	8.53507e-24
TTCTCGT	-134	E016	9_Het	-0.432537	0.0613836	1.83534e-12
TTATAAA	-94	E016	9_Het	-0.281605	0.0420965	2.23927e-11
TTGCTCC	-35	E016	9_Het	0.245194	0.0385518	2.01596e-10
ACGAGAT	-110	E016	9_Het	-0.449939	0.0624421	5.77455e-13
ATGTGCC	-33	E016	9_Het	0.449013	0.0531182	2.83681e-17
CCACGTG	9	E016	9_Het	-0.303839	0.0446558	1.01729e-11
AGCGTGA	82	E016	9_Het	-0.588019	0.0786206	7.47809e-14
TGTAAGA	-49	E016	9_Het	0.304186	0.0393895	1.14057e-14
TTGTAGC	-218	E016	9_Het	-0.272026	0.0415542	5.89801e-11
GTCTCGG	59	E016	9_Het	-0.439955	0.0682409	1.14021e-10
CCCGTGC	-143	E016	9_Het	-0.717199	0.113884	3.02266e-10
TACTGTT	-139	E016	9_Het	-0.339599	0.0516645	4.9256e-11
AACTGAA	-168	E016	5_TxWk	0.638043	0.0800433	1.5711e-15
TCCCACG	-201	E016	5_TxWk	0.61034	0.0835941	2.85127e-13
AGACGTG	-45	E016	5_TxWk	0.501247	0.0855284	4.61213e-09
CTGAATC	-166	E016	4_Tx	1.11265	0.117973	4.04502e-21
CCTTCCG	-21	E016	4_Tx	0.96599	0.161006	1.97661e-09
ATCCATG	-52	E016	8_ZNF/Rpts	0.994673	0.127256	5.43917e-15
CGGGTAT	63	E017	15_Quies	-0.297953	0.0502415	3.02161e-09
CGCCATG	-16	E017	15_Quies	-0.255184	0.0452512	1.70776e-08
TCGGGTA	62	E017	5_TxWk	0.584681	0.0780053	6.60981e-14
AACTGAA	-168	E017	5_TxWk	0.499401	0.0718683	3.6832e-12
CCGCCAT	-17	E017	5_TxWk	0.407029	0.0724593	1.9392e-08
ACTGAAT	-167	E017	4_Tx	1.02195	0.0995218	9.76019e-25
CCTTCCG	-21	E017	4_Tx	0.944022	0.138529	9.45022e-12
ACGTGCC	-33	E017	13_ReprPC	0.853496	0.143489	2.71159e-09
TTCCCTG	-75	E018	15_Quies	-0.259764	0.040953	2.25376e-10
ATCCATG	-52	E018	15_Quies	-0.277054	0.0469407	3.58669e-09
ATTGAAT	-167	E018	15_Quies	0.20711	0.0338706	9.67143e-10
GTTCTCG	-135	E018	14_ReprPCWk	0.605807	0.100361	1.57689e-09
TTCCCTG	-75	E018	9_Het	0.540107	0.0513195	6.66811e-26
ATCCATG	-52	E018	9_Het	0.578622	0.0574345	7.16512e-24
TTCTCGT	-134	E018	9_Het	-0.511928	0.0842936	1.25423e-09
AAGACGT	-46	E018	9_Het	-0.548235	0.0931839	4.02006e-09
TGAAAAT	86	E018	9_Het	0.285894	0.0507785	1.79982e-08
AGCGTGA	82	E018	9_Het	-0.625232	0.109917	1.28357e-08
GAATTGT	-221	E018	9_Het	-0.277457	0.0486254	1.15661e-08
ACTGAAT	-167	E018	5_TxWk	0.650167	0.072785	4.15729e-19
TCCCACG	-201	E018	5_TxWk	0.504894	0.0844624	2.26267e-09
TTCCCTG	-75	E019	15_Quies	-0.322058	0.0404502	1.69506e-15
ATCCATG	-52	E019	15_Quies	-0.326762	0.046709	2.6395e-12
ACTGAAT	-167	E019	15_Quies	-0.262043	0.0458445	1.09116e-08
ATCCATG	-52	E019	9_Het	0.670368	0.0545393	1.0064e-34
TTCCCTG	-75	E019	9_Het	0.465405	0.0492463	3.37037e-21
AAGACGT	-46	E019	9_Het	-0.797303	0.0958644	9.02283e-17
CACGAGA	-111	E019	9_Het	-0.622724	0.0821333	3.40605e-14
TATAAAT	47	E019	9_Het	-0.322389	0.0487852	3.88676e-11
CACGTGT	-199	E019	9_Het	-0.4433	0.0749939	3.39728e-09
TAACTGA	-169	E019	5_TxWk	0.575323	0.0828151	3.72915e-12
TAAGACG	-47	E019	5_TxWk	0.526156	0.0872331	1.62339e-09
TCCCACG	-201	E019	5_TxWk	0.496568	0.0863731	8.97189e-09
ACGAGAT	-110	E019	5_TxWk	0.471552	0.0834581	1.60295e-08
ACTGAAT	-167	E019	4_Tx	1.07249	0.13661	4.13569e-15
CCTTCCG	-21	E019	4_Tx	1.19671	0.175973	1.04209e-11
ATCCATG	-52	E020	15_Quies	-0.538191	0.0427755	2.66021e-36
TCCCTGC	-74	E020	15_Quies	-0.417492	0.0377449	1.94221e-28
TATAAAT	47	E020	15_Quies	0.213333	0.0334928	1.89623e-10
ATTGAAT	-167	E020	15_Quies	0.205151	0.0302819	1.24672e-11
TTCCTTT	40	E020	15_Quies	0.233563	0.0405597	8.48611e-09
ATCCATG	-52	E020	9_Het	0.626144	0.0516316	7.58495e-34
TCCCTGC	-74	E020	9_Het	0.509601	0.0425083	4.09392e-33
AAGACGT	-46	E020	9_Het	-0.733146	0.0734671	1.87901e-23
TTCTCGT	-134	E020	9_Het	-0.475936	0.0623837	2.36244e-14
TATAAAT	47	E020	9_Het	-0.362432	0.0413537	1.88114e-18
TCACGAG	-112	E020	9_Het	-0.460538	0.0614073	6.39538e-14
AGCGTGA	82	E020	9_Het	-0.57366	0.0797369	6.27274e-13
CCACGTG	9	E020	9_Het	-0.303507	0.0448411	1.30123e-11
TGTAAGA	-49	E020	9_Het	0.272456	0.0391088	3.24623e-12
TGTAAGT	20	E020	9_Het	0.24751	0.0428038	7.36261e-09
CCCGTGC	-143	E020	9_Het	-0.739517	0.116643	2.2974e-10
TTCCCCC	-147	E020	9_Het	-0.396272	0.058634	1.39519e-11
GATGTGC	-34	E020	9_Het	0.332403	0.0534457	4.98884e-10
CTCGGGT	61	E020	9_Het	-0.398204	0.0703059	1.47992e-08
TAACTGA	-169	E020	5_TxWk	0.67076	0.0842485	1.69711e-15
TCCCACG	-201	E020	5_TxWk	0.502781	0.0900664	2.37307e-08
ACTGAAT	-167	E020	4_Tx	1.05323	0.120462	2.26494e-18
AATAAGT	-120	E020	4_Tx	-0.747494	0.119393	3.8305e-10
ATCCATG	-52	E020	8_ZNF/Rpts	0.913742	0.134686	1.16692e-11
TAACTGA	-169	E021	15_Quies	-0.4423	0.0591576	7.62418e-14
CCGCCAT	-17	E021	15_Quies	-0.385675	0.0580862	3.14318e-11
ACTGAAT	-167	E021	5_TxWk	0.570592	0.0648215	1.33785e-18
CGAGATC	-109	E021	5_TxWk	0.470239	0.0723023	7.83218e-11
CCGCCAT	-17	E021	5_TxWk	0.44521	0.0713874	4.47368e-10
ATGATAG	-129	E021	5_TxWk	-0.437619	0.073597	2.74518e-09
AGACGTG	-45	E021	5_TxWk	0.42039	0.0751912	2.25839e-08
CGAGATC	-109	E022	15_Quies	-0.432875	0.0512319	2.93015e-17
GACGTGC	-34	E022	15_Quies	-0.553483	0.0720717	1.59573e-14
GTCAATT	25	E022	15_Quies	0.464989	0.0708805	5.37407e-11
CCGCCAT	-17	E022	15_Quies	-0.320085	0.051058	3.63252e-10
ATTGAAT	-167	E022	15_Quies	0.203339	0.0354269	9.48481e-09
AAAAATG	-97	E022	15_Quies	0.418071	0.0675781	6.15161e-10
AATAAGT	-120	E022	15_Quies	0.214926	0.0357692	1.87037e-09
CTTTATA	43	E022	9_Het	-0.420622	0.0649038	9.13012e-11
CGAGATC	-109	E022	5_TxWk	0.586974	0.0592933	4.18385e-23
GACGTGC	-34	E022	5_TxWk	0.720461	0.0811264	6.64242e-19
TGATAGT	-128	E022	5_TxWk	-0.276991	0.0459627	1.67616e-09
ATTGAAT	-167	E022	5_TxWk	-0.284894	0.0436253	6.55571e-11
CCGCCAT	-17	E022	5_TxWk	0.364015	0.0611223	2.59242e-09
TACGTCT	67	E022	5_TxWk	0.639347	0.111953	1.12413e-08
TCTCGTG	-133	E022	5_TxWk	0.337943	0.0606324	2.49489e-08
AAAAATG	-97	E022	5_TxWk	-0.528956	0.0933115	1.43876e-08
CTCACGA	-113	E023	15_Quies	-0.287541	0.0433033	3.13317e-11
CGCCATG	-16	E023	15_Quies	-0.313029	0.0460069	1.01781e-11
TCTCGTG	-133	E023	15_Quies	-0.274527	0.0435526	2.91317e-10
GACGTGC	-34	E023	15_Quies	-0.383167	0.0658882	6.04852e-09
TACGTCT	67	E023	14_ReprPCWk	0.817768	0.105613	9.70314e-15
TCACGAG	-112	E023	14_ReprPCWk	0.459678	0.0572933	1.02989e-15
TTTAAAA	-100	E023	14_ReprPCWk	-0.358919	0.0569986	3.03513e-10
TCCATGT	-51	E023	9_Het	0.467045	0.060425	1.08111e-14
CTGTAAG	19	E023	9_Het	0.388915	0.0576646	1.5362e-11
TCCCACG	-201	E023	9_Het	-0.584289	0.0996959	4.60892e-09
CGCCATG	-16	E023	5_TxWk	0.543934	0.0684907	1.994e-15
ACTGAAT	-167	E023	5_TxWk	0.433957	0.0632628	6.9055e-12
CTCACGA	-113	E023	5_TxWk	0.391252	0.0672149	5.85238e-09
ACTGAAT	-167	E023	4_Tx	0.950375	0.110719	9.19162e-18
CCGCCAT	-17	E023	4_Tx	0.759146	0.121835	4.63637e-10
ATCCATG	-52	E024	15_Quies	-0.397768	0.0428099	1.52127e-20
TATAAAT	47	E024	15_Quies	0.187248	0.0330757	1.50312e-08
ATTGAAT	-167	E024	15_Quies	0.184876	0.0299663	6.85199e-10
TCCCTGC	-74	E024	15_Quies	-0.213207	0.0379619	1.95027e-08
ATCCATG	-52	E024	9_Het	0.789659	0.0583201	9.0679e-42
TTCCCTG	-75	E024	9_Het	0.379072	0.0523891	4.63089e-13
AAGACGT	-46	E024	9_Het	-0.70581	0.100348	2.01271e-12
TCACGAG	-112	E024	9_Het	-0.562357	0.0837457	1.87997e-11
TCCCACG	-201	E024	9_Het	-0.533703	0.0873957	1.01688e-09
TTTCCCA	-146	E024	9_Het	0.311102	0.0503514	6.46645e-10
TTATAAA	-94	E024	9_Het	-0.344927	0.0502751	6.84809e-12
ATGTGCC	-33	E024	9_Het	0.400211	0.0673071	2.74703e-09
ACTGAAT	-167	E024	5_TxWk	0.546165	0.0608443	2.79666e-19
TAAGACG	-47	E024	5_TxWk	0.41703	0.0722128	7.69456e-09
ACTGAAT	-167	E024	4_Tx	0.937482	0.102171	4.48861e-20
CCTTCCG	-21	E024	4_Tx	1.00091	0.137148	2.91998e-13
AATAAGT	-120	E024	4_Tx	-0.684076	0.0972977	2.05422e-12
ATCCATG	-52	E024	8_ZNF/Rpts	1.01459	0.132047	1.54687e-14
CTCACGA	-113	E025	15_Quies	-0.302043	0.0437364	4.98554e-12
CGGGTAT	63	E025	15_Quies	-0.350761	0.0511601	7.07457e-12
GTTCTCG	-135	E025	15_Quies	-0.314644	0.04724	2.72823e-11
GACGTGC	-34	E025	15_Quies	-0.443144	0.0661394	2.08197e-11
GCAGCGT	80	E025	15_Quies	-0.338421	0.0549949	7.57023e-10
TACGTCT	67	E025	14_ReprPCWk	0.950642	0.106159	3.4007e-19
TCACGAG	-112	E025	14_ReprPCWk	0.350311	0.0608314	8.47528e-09
CTGTAAG	19	E025	9_Het	0.474558	0.0652186	3.42779e-13
CGGGTAT	63	E025	5_TxWk	0.464223	0.0764073	1.23498e-09
ACTGAAT	-167	E025	4_Tx	0.914661	0.0996112	4.21937e-20
CGCCATG	-16	E026	15_Quies	-0.317851	0.0478795	3.16762e-11
ACTGAAT	-167	E026	15_Quies	-0.291833	0.0427112	8.33319e-12
TTCTCGT	-134	E026	15_Quies	-0.276952	0.0460739	1.84334e-09
ACGAGAT	-110	E026	15_Quies	-0.282687	0.0466882	1.40615e-09
AAAATGA	88	E026	15_Quies	0.484244	0.0856876	1.59261e-08
TACGTCT	67	E026	14_ReprPCWk	0.725882	0.107783	1.64328e-11
ACTGAAT	-167	E026	5_TxWk	0.48684	0.0653882	9.6671e-14
CCGCCAT	-17	E026	5_TxWk	0.433612	0.0706802	8.52421e-10
CGGGTAT	63	E026	5_TxWk	0.479634	0.0792126	1.40399e-09
TCTCATG	-133	E026	5_TxWk	-0.291521	0.052201	2.34255e-08
ACTGAAT	-167	E026	4_Tx	0.98546	0.107177	3.76118e-20
ATCCATG	-52	E027	15_Quies	-0.420939	0.0420831	1.48491e-23
AGGTAAC	-172	E027	15_Quies	-0.395036	0.0568874	3.80688e-12
GTCAATT	25	E027	15_Quies	0.352747	0.0535552	4.50016e-11
ATCCATG	-52	E027	9_Het	0.682222	0.0531667	1.08888e-37
TTTATAA	-95	E027	9_Het	-0.296527	0.0428302	4.41149e-12
TCTCACG	-114	E027	9_Het	-0.494046	0.0686066	5.97121e-13
CCACGTG	9	E027	9_Het	-0.331053	0.0518786	1.75592e-10
TTCCCTG	-75	E027	9_Het	0.301717	0.0471259	1.52991e-10
CCGCCAT	-17	E027	9_Het	-0.489392	0.0725594	1.53334e-11
CTCCTCC	-31	E027	9_Het	0.26169	0.0453282	7.77683e-09
AAGACGT	-46	E027	9_Het	-0.512324	0.0826674	5.73976e-10
CGCCATG	-16	E027	5_TxWk	0.564069	0.0686473	2.08819e-16
AACTGAA	-168	E027	5_TxWk	0.538012	0.0674651	1.52786e-15
TCACGAG	-112	E027	5_TxWk	0.474925	0.0666741	1.05538e-12
CTCGGGT	61	E027	5_TxWk	0.469139	0.0769111	1.0623e-09
ACTGAAT	-167	E027	4_Tx	1.00912	0.0897334	2.43153e-29
TCCGCCA	-18	E027	4_Tx	0.745014	0.127885	5.68858e-09
AGCGTGA	82	E027	4_Tx	0.682671	0.120888	1.63162e-08
ACGTGCC	-33	E027	7_Enh	1.14972	0.197057	5.39753e-09
AGGTAAC	-172	E028	15_Quies	-0.442261	0.0572701	1.14181e-14
TCACGAG	-112	E028	15_Quies	-0.294795	0.043674	1.47935e-11
TACGTCT	67	E028	14_ReprPCWk	1.07839	0.122508	1.33665e-18
CGAGATC	-109	E028	14_ReprPCWk	0.584836	0.0749097	5.8467e-15
AACTGAA	-168	E028	5_TxWk	0.391721	0.0554613	1.62989e-12
CGGGTAT	63	E028	5_TxWk	0.366733	0.0631101	6.21006e-09
CTGAATC	-166	E028	4_Tx	0.829658	0.0963367	7.17576e-18
TTTATAA	-95	E029	15_Quies	0.279364	0.0308556	1.37949e-19
TAATTGA	-169	E029	15_Quies	0.231607	0.029086	1.68133e-15
CCCACCC	-240	E029	15_Quies	-0.206952	0.0286359	4.93792e-13
ATCCATG	-52	E029	15_Quies	-0.338039	0.0428268	2.94598e-15
GATGTGC	-34	E029	15_Quies	-0.359737	0.0442525	4.32173e-16
ATACTGT	-140	E029	15_Quies	0.225307	0.0389561	7.31181e-09
TAAGACG	-47	E029	14_ReprPCWk	0.559351	0.0939862	2.65838e-09
TTTATAA	-95	E029	9_Het	-0.278542	0.0345242	7.14452e-16
ATCCATG	-52	E029	9_Het	0.452812	0.044593	3.17024e-24
GATGTGC	-34	E029	9_Het	0.38986	0.0474381	2.06422e-16
TACTGTT	-139	E029	9_Het	-0.320355	0.0434833	1.74107e-13
TAAGACG	-47	E029	9_Het	-0.424048	0.0585589	4.44087e-13
CTCACGA	-113	E029	9_Het	-0.355607	0.0504131	1.74016e-12
TCCCCAC	-242	E029	9_Het	0.235538	0.0317689	1.22431e-13
CACGTGT	-199	E029	9_Het	-0.282207	0.0490567	8.78375e-09
TAATTGA	-169	E029	9_Het	-0.18333	0.0319287	9.36383e-09
AACTGAA	-168	E029	5_TxWk	0.568521	0.098071	6.74963e-09
ACTGAAT	-167	E029	4_Tx	0.846567	0.109999	1.40215e-14
CCGCCAT	-17	E029	4_Tx	0.782652	0.117383	2.60228e-11
TTTATAA	-95	E030	15_Quies	0.207022	0.0323037	1.46835e-10
TCCCTGC	-74	E030	15_Quies	-0.223352	0.0396547	1.77702e-08
GAGTCCA	23	E030	14_ReprPCWk	0.36996	0.0585916	2.71545e-10
TAAGACG	-47	E030	14_ReprPCWk	0.455908	0.079951	1.18173e-08
TCCATGT	-51	E030	9_Het	0.509855	0.0510648	1.78237e-23
TCCCTGC	-74	E030	9_Het	0.382747	0.0495418	1.11203e-14
AAGACGT	-46	E030	9_Het	-0.737935	0.0906295	3.87745e-16
TTATAAA	-94	E030	9_Het	-0.260694	0.0445856	5.00381e-09
TACGTCT	67	E030	5_TxWk	1.04394	0.154836	1.5594e-11
ATTGAAT	-167	E030	5_TxWk	-0.436091	0.0759359	9.30827e-09
CTGCCGC	-58	E030	5_TxWk	0.692708	0.117521	3.76167e-09
ACTGAAT	-167	E030	4_Tx	0.950227	0.114318	9.39652e-17
CTGAATC	-166	E031	15_Quies	-0.377021	0.0458277	1.92055e-16
CGGACTA	92	E031	15_Quies	-0.438896	0.0644059	9.45679e-12
GGTTTGG	-254	E031	15_Quies	-0.188638	0.0325794	7.03422e-09
TCTCACG	-114	E031	15_Quies	-0.261693	0.0452338	7.23654e-09
ATCCATG	-52	E031	9_Het	0.578492	0.0758415	2.39083e-14
AGATGTG	-43	E031	9_Het	0.565522	0.0688085	2.05575e-16
AAGACAT	-46	E031	9_Het	0.492353	0.0847919	6.37495e-09
ACTGAAT	-167	E031	5_TxWk	0.712434	0.0744858	1.12521e-21
CGCCATG	-16	E031	5_TxWk	0.5878	0.0847881	4.13226e-12
AATAAGT	-120	E031	5_TxWk	-0.424376	0.0649111	6.24309e-11
GTCTCGG	59	E031	5_TxWk	0.515128	0.0913423	1.70508e-08
ACTGAAT	-167	E031	4_Tx	0.882666	0.104202	2.43808e-17
ATCCATG	-52	E031	8_ZNF/Rpts	0.982331	0.14927	4.67582e-11
ACTGAAT	-167	E032	15_Quies	-0.288001	0.0436229	4.05502e-11
TTATCAG	74	E032	15_Quies	-0.20307	0.0325481	4.40166e-10
CCATGTA	-52	E032	15_Quies	-0.199961	0.0321163	4.78084e-10
GATGTGC	-34	E032	9_Het	0.515238	0.0630269	2.96125e-16
TCCCTGC	-74	E032	9_Het	0.315213	0.0547774	8.69311e-09
CCATGTA	-52	E032	9_Het	0.411797	0.052221	3.12912e-15
TTATAAA	-94	E032	9_Het	-0.317139	0.0504544	3.26495e-10
AACTGAA	-168	E032	5_TxWk	0.771334	0.0904121	1.4469e-17
AATAAGT	-120	E032	5_TxWk	-0.483941	0.0743926	7.75698e-11
ACTGAAT	-167	E032	4_Tx	0.836485	0.109775	2.53685e-14
CCGCCAT	-17	E032	4_Tx	0.738178	0.119002	5.53757e-10
AACTGAA	-168	E033	15_Quies	-0.372554	0.0469709	2.16359e-15
TCTCACG	-114	E033	15_Quies	-0.296448	0.0445353	2.80466e-11
AAACGGA	89	E033	15_Quies	-0.445583	0.0635502	2.35764e-12
CGCCATG	-16	E033	15_Quies	-0.294856	0.0487382	1.4504e-09
TCTCGTG	-133	E033	15_Quies	-0.265236	0.0461949	9.37396e-09
TAAGACG	-47	E033	15_Quies	-0.285605	0.0506117	1.67058e-08
GCTCCCA	-213	E033	14_ReprPCWk	0.281155	0.0448864	3.75959e-10
AACTGAA	-168	E033	5_TxWk	0.661084	0.0756425	2.33982e-18
GTCTCGG	59	E033	5_TxWk	0.49377	0.0863703	1.08488e-08
ACTGAAT	-167	E033	4_Tx	0.916223	0.0875508	1.25023e-25
TCTCACG	-114	E033	4_Tx	0.65423	0.094632	4.73141e-12
AATAAGT	-120	E033	4_Tx	-0.489815	0.0809091	1.41388e-09
TCACGAG	-112	E034	15_Quies	-0.349882	0.0430922	4.68527e-16
ACGTGCC	-33	E034	15_Quies	-0.49453	0.0662871	8.62412e-14
CGCCATG	-16	E034	15_Quies	-0.352147	0.0456935	1.29097e-14
CCACGTG	9	E034	15_Quies	-0.225515	0.0343813	5.40869e-11
AGCAGCG	79	E034	15_Quies	-0.349604	0.0544578	1.36515e-10
GGGAGGG	-189	E034	15_Quies	-0.189555	0.0293916	1.12374e-10
AACGGAC	90	E034	15_Quies	-0.359103	0.0600005	2.16387e-09
AATTTCC	50	E034	15_Quies	0.332805	0.0568308	4.73949e-09
AATTAAA	28	E034	15_Quies	0.236954	0.0386828	9.03629e-10
TATTAAA	28	E034	15_Quies	0.485605	0.0845973	9.4572e-09
GAGTCCA	23	E034	14_ReprPCWk	0.263572	0.0335488	3.95419e-15
CGAGATC	-109	E034	14_ReprPCWk	0.342173	0.0469019	2.9753e-13
GAGGGAC	-187	E034	14_ReprPCWk	0.182274	0.0314406	6.73484e-09
AACTGAA	-168	E034	5_TxWk	0.669439	0.0861009	7.54168e-15
ACTGAAT	-167	E034	4_Tx	0.926998	0.108161	1.03028e-17
CCGCCAT	-17	E034	4_Tx	0.791278	0.117026	1.36537e-11
GTAACTG	-170	E035	15_Quies	-0.467441	0.0550256	1.98002e-17
ATCCATG	-52	E035	15_Quies	-0.265298	0.0439285	1.54769e-09
CGCCATG	-16	E035	15_Quies	-0.296603	0.048123	7.11839e-10
CCCCCAT	-145	E035	14_ReprPCWk	0.350422	0.0628584	2.47831e-08
ATCCATG	-52	E035	9_Het	0.576642	0.0611536	4.12389e-21
TTCCCTG	-75	E035	9_Het	0.476638	0.0550794	4.98797e-18
AGATGTG	-43	E035	9_Het	0.527725	0.0541131	1.8042e-22
AGACATG	-45	E035	9_Het	0.43885	0.0649319	1.39308e-11
ACTGAAT	-167	E035	5_TxWk	0.634807	0.0693311	5.37782e-20
CGCCATG	-16	E035	5_TxWk	0.574192	0.0773746	1.16291e-13
TAAGACG	-47	E035	5_TxWk	0.546889	0.0810062	1.46634e-11
CTCATGA	-113	E035	5_TxWk	-0.380457	0.0589039	1.05445e-10
CTGAATC	-166	E035	4_Tx	0.903061	0.132296	8.72799e-12
ATCCATG	-52	E035	8_ZNF/Rpts	1.11114	0.126328	1.42234e-18
TCACGAG	-112	E036	15_Quies	-0.350412	0.0451897	8.88796e-15
CCGCCAT	-17	E036	15_Quies	-0.318654	0.0462782	5.7536e-12
TAATTGA	-169	E036	15_Quies	0.182516	0.0315023	6.88383e-09
ATCCATG	-52	E036	15_Quies	-0.266204	0.0439927	1.43855e-09
TCACGAG	-112	E036	14_ReprPCWk	0.509545	0.0635536	1.0787e-15
TACGTCT	67	E036	14_ReprPCWk	0.755112	0.118687	1.98844e-10
TTTTAAA	-101	E036	14_ReprPCWk	-0.373401	0.0669481	2.44032e-08
ATCCATG	-52	E036	9_Het	0.45808	0.0663754	5.15135e-12
AGATGTG	-43	E036	9_Het	0.424198	0.050434	4.0668e-17
TTCCCTG	-75	E036	9_Het	0.393874	0.0571966	5.72563e-12
CCATGTA	-52	E036	9_Het	0.349067	0.0548327	1.93984e-10
ACTGAAT	-167	E036	5_TxWk	0.535522	0.0813911	4.71641e-11
TAAGACG	-47	E036	5_TxWk	0.543434	0.0927868	4.71858e-09
ACTGAAT	-167	E036	4_Tx	0.854394	0.102683	8.74223e-17
TTCCGCC	-19	E036	4_Tx	0.871701	0.136019	1.46778e-10
AGTGAAT	-124	E036	4_Tx	-0.613751	0.0931433	4.41867e-11
TCTCACG	-114	E036	4_Tx	0.627802	0.110688	1.41281e-08
ATCCATG	-52	E036	8_ZNF/Rpts	0.8814	0.130367	1.37109e-11
TAACTGA	-169	E037	15_Quies	-0.51597	0.0652094	2.52267e-15
CCGCCAT	-17	E037	15_Quies	-0.366926	0.0650005	1.65208e-08
TCTCATG	-133	E037	15_Quies	0.281944	0.0469121	1.85458e-09
TAACTGA	-169	E037	5_TxWk	0.835778	0.0859948	2.50393e-22
TCTCATG	-133	E037	5_TxWk	-0.406217	0.0689707	3.86879e-09
GAAAACG	87	E037	5_TxWk	0.62781	0.112451	2.36427e-08
ACTGAAT	-167	E038	15_Quies	-0.604978	0.0578834	1.43961e-25
TCTCATG	-133	E038	15_Quies	0.280659	0.0470035	2.35753e-09
ACTGAAT	-167	E038	5_TxWk	0.73207	0.0764288	9.85146e-22
CCGCCAT	-17	E038	4_Tx	0.967456	0.173429	2.42762e-08
ACTGAAT	-167	E039	15_Quies	-0.385614	0.050258	1.68422e-14
CCGCCAT	-17	E039	15_Quies	-0.359671	0.054529	4.22524e-11
CTTCTCT	-58	E039	9_Het	0.724883	0.119152	1.17446e-09
ACTGAAT	-167	E039	5_TxWk	0.726809	0.0765843	2.30334e-21
TCACGAG	-112	E039	5_TxWk	0.535482	0.0842785	2.1016e-10
ACTGAAT	-167	E039	4_Tx	0.915747	0.124922	2.29257e-13
CCGCCAT	-17	E039	4_Tx	0.848268	0.132907	1.74335e-10
TAACTGA	-169	E040	15_Quies	-0.446333	0.0556895	1.10433e-15
TAACTGA	-169	E040	5_TxWk	0.85205	0.0830292	1.04465e-24
GTCTCGG	59	E040	5_TxWk	0.550365	0.0952153	7.46045e-09
AACGGAC	90	E041	15_Quies	-0.446039	0.0637433	2.60699e-12
TAACTGA	-169	E041	15_Quies	-0.314076	0.0497607	2.75936e-10
CCACGTG	9	E041	15_Quies	-0.213851	0.0383219	2.39975e-08
GGGAGGG	-189	E041	14_ReprPCWk	0.243502	0.0423036	8.61034e-09
CATCCAT	-53	E041	9_Het	0.691268	0.0973928	1.26824e-12
ACTGAAT	-167	E041	5_TxWk	0.548512	0.0811705	1.40363e-11
ACTGAAT	-167	E041	4_Tx	1.02233	0.118385	5.84033e-18
TCCGCCA	-18	E041	4_Tx	0.975892	0.155664	3.62869e-10
TAACTGA	-169	E042	15_Quies	-0.38004	0.054405	2.84041e-12
CCGCCAT	-17	E042	15_Quies	-0.337351	0.0530646	2.05261e-10
TCTCATG	-133	E042	15_Quies	0.209988	0.0371557	1.58994e-08
GCTCCCA	-213	E042	14_ReprPCWk	0.329348	0.0526425	3.94181e-10
TAACTGA	-169	E042	5_TxWk	0.730073	0.0826178	9.85404e-19
CTGAATC	-166	E042	4_Tx	1.08504	0.1401	9.57642e-15
TCCGCCA	-18	E042	4_Tx	1.04236	0.175535	2.88164e-09
AACTGAA	-168	E043	15_Quies	-0.284357	0.0493347	8.22197e-09
ACGTGCC	-33	E043	15_Quies	-0.409544	0.0711251	8.50791e-09
AGATGTG	-43	E043	9_Het	0.413827	0.0713237	6.54894e-09
AACTGAA	-168	E043	5_TxWk	0.641578	0.0891666	6.23373e-13
ACTGAAT	-167	E043	4_Tx	1.00754	0.105919	1.86374e-21
CCGCCAT	-17	E043	4_Tx	0.726587	0.118493	8.68325e-10
AAAACGG	88	E044	15_Quies	-0.360868	0.0604452	2.37e-09
AACTGAA	-168	E044	5_TxWk	0.654612	0.0891666	2.11287e-13
TCACGAG	-112	E044	5_TxWk	0.53928	0.0894682	1.6639e-09
ACTGAAT	-167	E044	4_Tx	0.932298	0.113995	2.87668e-16
CCGCCAT	-17	E044	4_Tx	0.80242	0.124016	9.78177e-11
TAACTGA	-169	E045	15_Quies	-0.520505	0.0603382	6.32794e-18
TCTCATG	-133	E045	15_Quies	0.25029	0.0431309	6.5128e-09
AAAACGG	88	E045	15_Quies	-0.423978	0.0746575	1.35512e-08
ACTGAAT	-167	E045	5_TxWk	0.628888	0.0771507	3.59688e-16
ACTGAAT	-167	E045	4_Tx	0.881255	0.135866	8.80164e-11
TTTATAA	-95	E046	15_Quies	0.189029	0.0336923	2.01799e-08
ACTGAAT	-167	E046	15_Quies	-0.285545	0.0422953	1.46609e-11
TTTATAA	-95	E046	9_Het	-0.324841	0.0473013	6.53407e-12
TCACGAG	-112	E046	9_Het	-0.543851	0.0763299	1.04075e-12
ATTACCC	51	E046	9_Het	-0.321536	0.0529247	1.23712e-09
ACCTCTT	34	E046	9_Het	-0.273502	0.0426526	1.43329e-10
TCCATGT	-51	E046	9_Het	0.305258	0.0527907	7.3633e-09
TAACTGA	-169	E046	5_TxWk	0.721539	0.0859493	4.66145e-17
ACTGAAT	-167	E046	4_Tx	0.872008	0.107094	3.87342e-16
TCCGCCA	-18	E046	4_Tx	0.885759	0.140972	3.31645e-10
CTGAATC	-166	E047	15_Quies	-0.331642	0.0532456	4.70829e-10
ACTGAAT	-167	E047	5_TxWk	0.655477	0.08136	7.85148e-16
AATAAGT	-120	E047	5_TxWk	-0.459099	0.0709407	9.69771e-11
ACTGAAT	-167	E047	4_Tx	1.21056	0.18984	1.8089e-10
ACTGAAT	-167	E048	15_Quies	-0.475531	0.0590523	8.09849e-16
CCGCCAT	-17	E048	15_Quies	-0.375912	0.0648704	6.83947e-09
ACGTGCC	-33	E048	15_Quies	-0.524823	0.091426	9.44471e-09
ACTGAAT	-167	E048	5_TxWk	0.7291	0.0797262	5.9601e-20
CACGAGA	-111	E048	5_TxWk	0.505061	0.0887418	1.26035e-08
ACGAGAT	-110	E049	15_Quies	-0.31919	0.0448143	1.05986e-12
CGCCATG	-16	E049	15_Quies	-0.304174	0.0461987	4.57876e-11
ACGTGCC	-33	E049	15_Quies	-0.377898	0.0662262	1.15549e-08
ATTGAAT	-167	E049	15_Quies	0.171442	0.0296834	7.66398e-09
TACGTCT	67	E049	14_ReprPCWk	0.625701	0.106889	4.80543e-09
CACGAGA	-111	E049	14_ReprPCWk	0.318985	0.0568434	2.00419e-08
CCTTCCG	-21	E049	5_TxWk	0.671337	0.0910187	1.63336e-13
ACTGAAT	-167	E049	5_TxWk	0.459527	0.0664148	4.54684e-12
TCACGAG	-112	E049	5_TxWk	0.400238	0.0708182	1.58934e-08
ACTGAAT	-167	E049	4_Tx	0.99701	0.0981726	3.12622e-24
ATCCATG	-52	E050	15_Quies	-0.324042	0.0439561	1.68161e-13
ACTGAAT	-167	E050	15_Quies	-0.296614	0.0428627	4.51319e-12
CGCCATG	-16	E050	15_Quies	-0.298094	0.0485439	8.21497e-10
TCCCTGC	-74	E050	15_Quies	-0.236045	0.0391641	1.66939e-09
AATTGCC	50	E050	14_ReprPCWk	-0.505464	0.0757191	2.46358e-11
ATCCATG	-52	E050	9_Het	0.622978	0.0577995	4.36045e-27
AGATGTG	-43	E050	9_Het	0.328064	0.0478517	7.08911e-12
TCCCTGC	-74	E050	9_Het	0.50413	0.0523135	5.59534e-22
CACGTGT	-199	E050	9_Het	-0.444449	0.0772594	8.78368e-09
AAGACGT	-46	E050	9_Het	-0.676573	0.0989888	8.20954e-12
ACTGAAT	-167	E050	5_TxWk	0.54941	0.0831517	3.91321e-11
CTGAATC	-166	E050	4_Tx	0.937733	0.114047	1.9952e-16
CCTTCCG	-21	E050	4_Tx	0.925701	0.151156	9.11752e-10
CATCCAT	-53	E050	8_ZNF/Rpts	0.812931	0.137524	3.39643e-09
ATCCATG	-52	E051	15_Quies	-0.290356	0.0433889	2.20241e-11
AGGTAAC	-172	E051	15_Quies	-0.410572	0.0567929	4.85534e-13
CCCACCC	-240	E051	15_Quies	-0.162978	0.0287467	1.43247e-08
GTCAATT	25	E051	15_Quies	0.323809	0.0530019	1.00014e-09
TCCATGT	-51	E051	14_ReprPCWk	-0.517517	0.0797358	8.5607e-11
ACGTGCC	-33	E051	14_ReprPCWk	0.539698	0.0940143	9.4345e-09
AGCGTGA	82	E051	14_ReprPCWk	0.472174	0.0808877	5.30217e-09
ATCCATG	-52	E051	9_Het	0.496771	0.053259	1.08448e-20
AGATGTG	-43	E051	9_Het	0.261664	0.040094	6.74373e-11
AAGACGT	-46	E051	9_Het	-0.765274	0.0813773	5.25146e-21
TCCCTGC	-74	E051	9_Het	0.339292	0.0453918	7.73572e-14
TCTCACG	-114	E051	9_Het	-0.46863	0.062215	4.98064e-14
TGTAAGA	-49	E051	9_Het	0.330566	0.041785	2.55069e-15
TTATAAA	-94	E051	9_Het	-0.246644	0.0418206	3.68657e-09
TCACGAG	-112	E051	5_TxWk	0.615895	0.0842245	2.62125e-13
ACTGAAT	-167	E051	5_TxWk	0.515374	0.0821493	3.52734e-10
ACTGAAT	-167	E051	4_Tx	0.918635	0.0968405	2.39929e-21
TCTCATG	-133	E051	4_Tx	-0.503463	0.0886954	1.37625e-08
CCTTCCG	-21	E051	4_Tx	0.814763	0.137628	3.21869e-09
ATCCATG	-52	E051	8_ZNF/Rpts	0.773125	0.104679	1.51654e-13
TAACTGA	-169	E051	8_ZNF/Rpts	0.711781	0.116178	8.97651e-10
CACGAGA	-111	E052	15_Quies	-0.319664	0.0452757	1.66039e-12
AGCAGCG	79	E052	15_Quies	-0.420168	0.0557203	4.67573e-14
CGCCATG	-16	E052	15_Quies	-0.318888	0.0475804	2.05454e-11
CGTGCCT	-32	E052	15_Quies	-0.422828	0.0672696	3.26649e-10
TTCTCGT	-134	E052	15_Quies	-0.268021	0.0458163	4.91828e-09
TACGTCT	67	E052	15_Quies	-0.539046	0.0916965	4.13794e-09
TACGTCT	67	E052	14_ReprPCWk	0.717296	0.104277	6.03747e-12
AAAAATG	-97	E052	14_ReprPCWk	-0.456561	0.0805779	1.46105e-08
CCGCCAT	-17	E052	5_TxWk	0.51106	0.0705075	4.22011e-13
ACTGAAT	-167	E052	5_TxWk	0.476136	0.0663067	6.92978e-13
CCCACGT	-200	E052	5_TxWk	0.43503	0.0703867	6.38729e-10
ACTGAAT	-167	E052	4_Tx	0.988581	0.127802	1.03176e-14
CACGAGA	-111	E053	15_Quies	-0.337022	0.0451645	8.51452e-14
ACTGAAT	-167	E053	15_Quies	-0.312673	0.0422907	1.431e-13
GCGTGAA	83	E053	15_Quies	-0.39556	0.0672573	4.07086e-09
ACGTGCC	-33	E053	15_Quies	-0.41706	0.06803	8.75882e-10
TTATAAA	-94	E053	15_Quies	0.174198	0.0310931	2.11326e-08
TCTCACG	-114	E053	14_ReprPCWk	0.513582	0.0593021	4.6994e-18
TACGTCT	67	E053	14_ReprPCWk	0.739765	0.115012	1.25864e-10
ACGTGCC	-33	E053	14_ReprPCWk	0.510681	0.0898983	1.34179e-08
TAAATTG	48	E053	14_ReprPCWk	-0.326213	0.0570532	1.07975e-08
ATCCATG	-52	E053	9_Het	0.699129	0.0639516	8.09019e-28
TACCCAG	53	E053	9_Het	-0.35511	0.0631749	1.89791e-08
TCTCACG	-114	E053	9_Het	-0.569508	0.0944214	1.62384e-09
AACTGAA	-168	E053	5_TxWk	0.661655	0.0719829	3.86201e-20
CGCCATG	-16	E053	5_TxWk	0.517267	0.0763929	1.27779e-11
CACGAGA	-111	E053	5_TxWk	0.457505	0.0744295	7.90519e-10
TCCCACG	-201	E053	5_TxWk	0.445688	0.0791213	1.77131e-08
CTGAATC	-166	E053	4_Tx	0.911522	0.117367	8.07329e-15
GCGTGAA	83	E053	4_Tx	0.936881	0.160072	4.83141e-09
CCGCCAT	-17	E053	4_Tx	0.738159	0.123044	1.98355e-09
ATCCATG	-52	E053	8_ZNF/Rpts	0.99074	0.165276	2.04164e-09
ATCCATG	-52	E054	15_Quies	-0.367457	0.0442901	1.0713e-16
ATTGAAT	-167	E054	15_Quies	0.236553	0.0322699	2.29374e-13
TCACGAG	-112	E054	15_Quies	-0.267372	0.0468892	1.18266e-08
TACGTCT	67	E054	14_ReprPCWk	0.997851	0.121369	2.00763e-16
CTCACGA	-113	E054	14_ReprPCWk	0.466236	0.0720077	9.49293e-11
ATCCATG	-52	E054	9_Het	0.820945	0.0596446	4.19981e-43
AGATGTG	-43	E054	9_Het	0.302046	0.0516618	5.01716e-09
TTTCCCT	-76	E054	9_Het	0.314641	0.0544719	7.64036e-09
AACTGAA	-168	E054	5_TxWk	0.712315	0.0743243	9.34667e-22
CCGCCAT	-17	E054	5_TxWk	0.50825	0.077417	5.19983e-11
TAAGACG	-47	E054	5_TxWk	0.50117	0.0832982	1.78139e-09
ACTGAAT	-167	E054	4_Tx	0.894257	0.119698	7.96115e-14
AGCGTGA	82	E054	4_Tx	0.832875	0.148952	2.25022e-08
AATAAGT	-120	E054	4_Tx	-0.66008	0.113446	5.93878e-09
ATCCATG	-52	E054	8_ZNF/Rpts	1.08121	0.157265	6.1946e-12
TCAATTA	26	E055	15_Quies	0.290289	0.0475799	1.05355e-09
TCACGAG	-112	E055	15_Quies	-0.248551	0.042448	4.7584e-09
ACGTGCC	-33	E055	15_Quies	-0.383164	0.0656844	5.4307e-09
TACGTCT	67	E055	14_ReprPCWk	0.652557	0.108133	1.59212e-09
CGCCATG	-16	E055	5_TxWk	0.517453	0.0706827	2.46533e-13
ACTGAAT	-167	E055	5_TxWk	0.413917	0.0652961	2.31135e-10
CTGAATC	-166	E055	4_Tx	0.954286	0.105115	1.1009e-19
ACGTGCC	-33	E055	13_ReprPC	0.982607	0.142688	5.72165e-12
TCACGAG	-112	E056	15_Quies	-0.299755	0.0425952	1.9601e-12
GACGTGC	-34	E056	15_Quies	-0.368393	0.0651078	1.52965e-08
ACGTGCC	-33	E056	14_ReprPCWk	0.480429	0.0824609	5.67227e-09
TACGTCT	67	E056	14_ReprPCWk	0.643883	0.108209	2.67509e-09
ACTGAAT	-167	E056	5_TxWk	0.492953	0.0630232	5.20867e-15
CGCCATG	-16	E056	5_TxWk	0.50133	0.06973	6.49862e-13
TCACGAG	-112	E056	5_TxWk	0.42496	0.0674937	3.04849e-10
ACTGAAT	-167	E056	4_Tx	0.976413	0.11429	1.30422e-17
TCACGAG	-112	E057	15_Quies	-0.331695	0.043607	2.81691e-14
CCGCCAT	-17	E057	15_Quies	-0.27646	0.044659	5.99893e-10
GTAACTG	-170	E057	15_Quies	-0.303997	0.0544308	2.33678e-08
GAGTCCA	23	E057	14_ReprPCWk	0.322479	0.0435292	1.27897e-13
TCCATGT	-51	E057	9_Het	0.401959	0.0635426	2.51907e-10
AACTGAA	-168	E057	5_TxWk	0.516504	0.0728586	1.34955e-12
CCGCCAT	-17	E057	5_TxWk	0.444745	0.0734116	1.37624e-09
CTGAATC	-166	E057	4_Tx	0.867222	0.0968914	3.54031e-19
CCGCCAT	-17	E057	4_Tx	0.6441	0.104078	6.06984e-10
TACGTCT	67	E058	14_ReprPCWk	0.784963	0.109295	6.86747e-13
ATCCATG	-52	E058	9_Het	0.368512	0.0504388	2.7498e-13
TTCTCGT	-134	E058	9_Het	-0.40313	0.0652238	6.38111e-10
AACTGAA	-168	E058	5_TxWk	0.58939	0.0739263	1.55269e-15
CGGGTAT	63	E058	5_TxWk	0.559589	0.0836042	2.18174e-11
ACTGAAT	-167	E058	4_Tx	0.861778	0.0884298	1.93142e-22
CCGCCAT	-17	E058	4_Tx	0.648969	0.0985306	4.50394e-11
ACGTGCC	-33	E059	15_Quies	-0.459691	0.0667688	5.78577e-12
TCACGAG	-112	E059	15_Quies	-0.280388	0.0446747	3.46921e-10
TACGTCT	67	E059	14_ReprPCWk	0.656458	0.104023	2.77747e-10
GCCATCC	-55	E059	9_Het	0.447438	0.0785343	1.21681e-08
AACTGAA	-168	E059	5_TxWk	0.740577	0.0684188	2.64463e-27
GTCTCGG	59	E059	5_TxWk	0.528083	0.0787278	1.97701e-11
CCGCCAT	-17	E059	5_TxWk	0.467311	0.0721001	9.08646e-11
ATCCATG	-52	E061	9_Het	0.393867	0.0608766	9.80492e-11
ACTGAAT	-167	E061	5_TxWk	0.438676	0.0681122	1.19092e-10
AGCAGCG	79	E061	5_TxWk	0.530935	0.086414	8.04264e-10
ACTGAAT	-167	E061	4_Tx	0.876831	0.0952443	3.38128e-20
AATAAGT	-120	E061	4_Tx	-0.624728	0.0888847	2.08732e-12
TCCGCCA	-18	E061	4_Tx	0.782512	0.131196	2.4545e-09
CCGCCAT	-17	E062	15_Quies	-0.343946	0.0485383	1.37973e-12
AACGGAC	90	E062	15_Quies	-0.413162	0.0647887	1.80513e-10
ACTGAAT	-167	E062	15_Quies	-0.28487	0.0453229	3.27134e-10
GAGTCCA	23	E062	14_ReprPCWk	0.304768	0.0479973	2.15745e-10
CTTTATA	43	E062	9_Het	-0.435284	0.0778436	2.24766e-08
AACTGAA	-168	E062	5_TxWk	0.769415	0.0800326	6.99422e-22
CGCCATG	-16	E062	5_TxWk	0.522901	0.0873281	2.12723e-09
ACTGAAT	-167	E062	4_Tx	0.963312	0.109421	1.32398e-18
CCGCCAT	-17	E062	4_Tx	0.798402	0.118874	1.86268e-11
AGGTAAC	-172	E063	15_Quies	-0.449333	0.05891	2.39454e-14
TCTCACG	-114	E063	15_Quies	-0.297607	0.0437774	1.05948e-11
TCTCGGG	60	E063	15_Quies	-0.303811	0.0522151	5.93959e-09
ACATGTC	-198	E063	15_Quies	0.324658	0.0572914	1.45495e-08
TCTCACG	-114	E063	14_ReprPCWk	0.541255	0.0627701	6.5325e-18
TACGTCT	67	E063	14_ReprPCWk	0.868495	0.11686	1.07023e-13
ACGTGCC	-33	E063	14_ReprPCWk	0.527147	0.0944867	2.41827e-08
CATCCAT	-53	E063	9_Het	0.650145	0.0622775	1.63711e-25
TTTTGTA	43	E063	9_Het	0.339581	0.0561472	1.46615e-09
TCACGAG	-112	E063	9_Het	-0.634556	0.0957729	3.45769e-11
AAGACGT	-46	E063	9_Het	-0.584834	0.103805	1.76107e-08
AACTGAA	-168	E063	5_TxWk	0.568314	0.0699932	4.67869e-16
CGCCATG	-16	E063	5_TxWk	0.562391	0.0716525	4.19838e-15
GTCTCGG	59	E063	5_TxWk	0.514511	0.0777572	3.66837e-11
CGCCTTC	-23	E063	5_TxWk	0.630497	0.11026	1.07613e-08
ACTGAAT	-167	E063	4_Tx	1.13488	0.106449	1.54466e-26
AGCGTGA	82	E063	4_Tx	0.837777	0.139778	2.05201e-09
CCGCCAT	-17	E065	15_Quies	-0.306712	0.0446957	6.77996e-12
ACTGAAT	-167	E065	15_Quies	-0.275393	0.0412996	2.59004e-11
TTATAAA	-94	E065	9_Het	-0.315481	0.0439886	7.39661e-13
ATCCATG	-52	E065	9_Het	0.366412	0.0558889	5.52437e-11
AACTGAA	-168	E065	5_TxWk	0.579674	0.0574768	6.41344e-24
CGCCATG	-16	E065	5_TxWk	0.48537	0.0599507	5.67241e-16
CGGGTAT	63	E065	5_TxWk	0.462069	0.0665906	3.9505e-12
AGCGTGA	82	E065	5_TxWk	0.462274	0.0705717	5.73757e-11
CTGAATC	-166	E065	4_Tx	1.19026	0.160723	1.30491e-13
CCGCCAT	-17	E066	15_Quies	-0.24673	0.0438767	1.87376e-08
TTTATAA	-95	E066	9_Het	-0.369233	0.0496886	1.07825e-13
TCACGAG	-112	E066	9_Het	-0.583943	0.0907917	1.26206e-10
TTCCCTG	-75	E066	9_Het	0.359336	0.0563839	1.85337e-10
AACTGAA	-168	E066	5_TxWk	0.59514	0.0727258	2.76085e-16
CGCCATG	-16	E066	5_TxWk	0.480971	0.0765369	3.29603e-10
AGCAGCG	79	E066	5_TxWk	0.543671	0.0884689	7.97952e-10
CTGAATC	-166	E066	4_Tx	0.965086	0.104098	1.84508e-20
TCCGCCA	-18	E066	4_Tx	0.87674	0.135713	1.0453e-10
CGGGTAT	63	E067	15_Quies	-0.412863	0.0608767	1.18555e-11
TAACTGA	-169	E067	15_Quies	-0.356391	0.0557617	1.64456e-10
AACTGAA	-168	E067	5_TxWk	0.752609	0.0685033	4.43967e-28
CCGCCAT	-17	E067	5_TxWk	0.495423	0.0720289	6.06491e-12
CGGGTAT	63	E067	5_TxWk	0.512152	0.081702	3.64464e-10
CTGAATC	-166	E067	4_Tx	1.12852	0.181823	5.4118e-10
ACTGAAT	-167	E068	15_Quies	-0.327135	0.0469734	3.30117e-12
GGTTTCC	-150	E068	14_ReprPCWk	0.48238	0.08518	1.48692e-08
TCACGAG	-112	E068	9_Het	-0.806644	0.124586	9.50743e-11
TCCATGT	-51	E068	9_Het	0.491423	0.0721419	9.63195e-12
ATGTGCC	-33	E068	9_Het	0.492627	0.0827282	2.60458e-09
CCCACGT	-200	E068	9_Het	-0.667004	0.118075	1.61392e-08
CACGAGA	-111	E068	5_TxWk	0.658298	0.0675959	2.06121e-22
ACTGAAT	-167	E068	5_TxWk	0.642124	0.064467	2.26935e-23
TACGTCT	67	E068	5_TxWk	0.750708	0.126027	2.57313e-09
CGCCATG	-16	E068	5_TxWk	0.507664	0.0737309	5.76395e-12
GATCTCA	-106	E068	5_TxWk	0.671859	0.114355	4.22285e-09
GTCTCGG	59	E068	5_TxWk	0.444987	0.0794178	2.1054e-08
ACTGAAT	-167	E068	4_Tx	1.19708	0.14312	6.05576e-17
AGCGTGA	82	E068	4_Tx	1.07914	0.176354	9.40794e-10
CACGAGA	-111	E069	15_Quies	-0.333113	0.0494139	1.56995e-11
TAACTGA	-169	E069	15_Quies	-0.328523	0.0516157	1.95566e-10
TACGTCT	67	E069	14_ReprPCWk	0.793088	0.119423	3.11607e-11
CGAGATC	-109	E069	14_ReprPCWk	0.43192	0.0687668	3.36526e-10
CCCCTTT	-79	E069	14_ReprPCWk	0.403804	0.0698572	7.45169e-09
TCACGAG	-112	E069	9_Het	-0.966071	0.172435	2.11262e-08
TAACTGA	-169	E069	5_TxWk	0.744936	0.0703072	3.12832e-26
CCGCCAT	-17	E069	5_TxWk	0.477737	0.0725126	4.44789e-11
CACGAGA	-111	E069	5_TxWk	0.423213	0.0730939	7.03908e-09
ACTGAAT	-167	E069	4_Tx	0.960903	0.163522	4.19567e-09
ATCCATG	-52	E070	15_Quies	-0.392487	0.0453244	4.73756e-18
CCGCCAT	-17	E070	15_Quies	-0.314753	0.0488521	1.17156e-10
GACGTGC	-34	E070	14_ReprPCWk	0.693311	0.0999606	4.03826e-12
ATCCATG	-52	E070	9_Het	0.851397	0.0601315	1.6448e-45
TAAGACG	-47	E070	9_Het	-0.756692	0.110562	7.69722e-12
CACGTGT	-199	E070	9_Het	-0.579002	0.0930577	4.90949e-10
TCACGAG	-112	E070	9_Het	-0.522312	0.0931443	2.05195e-08
TCTCACG	-114	E070	5_TxWk	0.622299	0.077928	1.39882e-15
ATTGAAT	-167	E070	5_TxWk	-0.490845	0.0639631	1.66882e-14
TACGTCT	67	E070	5_TxWk	0.892897	0.140334	1.98302e-10
CCGCCAT	-17	E070	5_TxWk	0.587046	0.0821903	9.16356e-13
AGATCTC	-107	E070	5_TxWk	0.791854	0.126129	3.42648e-10
ACTGAAT	-167	E070	4_Tx	0.996799	0.145254	6.76917e-12
ATCCATG	-52	E070	8_ZNF/Rpts	1.16667	0.205741	1.42328e-08
ACGAGAT	-110	E071	15_Quies	-0.309326	0.0483995	1.64692e-10
ACTGAAT	-167	E071	15_Quies	-0.285886	0.0445683	1.41229e-10
ACGAGAT	-110	E071	14_ReprPCWk	0.551893	0.0691225	1.41352e-15
TACGTCT	67	E071	14_ReprPCWk	0.879243	0.121179	3.99456e-13
CTTTTGT	42	E071	14_ReprPCWk	-0.432497	0.0694902	4.85094e-10
TCCATGT	-51	E071	9_Het	0.531621	0.0668546	1.83677e-15
CCCACGT	-200	E071	9_Het	-0.745443	0.114384	7.17233e-11
AACTGAA	-168	E071	5_TxWk	0.753069	0.066702	1.46961e-29
GCGTGAA	83	E071	5_TxWk	0.597406	0.0981091	1.13478e-09
CGCCATG	-16	E071	5_TxWk	0.413943	0.0737041	1.95109e-08
ACTGAAT	-167	E071	4_Tx	0.9249	0.145077	1.82693e-10
ACTGAAT	-167	E072	15_Quies	-0.331809	0.0462272	7.08429e-13
TGCCGCC	-57	E072	15_Quies	-0.437221	0.0628813	3.5728e-12
ATCCATG	-52	E072	9_Het	0.471474	0.0792243	2.66299e-09
AACTGAA	-168	E072	5_TxWk	0.75079	0.0684847	5.76317e-28
GCCGCCA	-56	E072	5_TxWk	0.688009	0.0854582	8.22352e-16
TCTCACG	-114	E072	5_TxWk	0.405724	0.0700883	7.09118e-09
ACTGAAT	-167	E072	4_Tx	1.0161	0.143965	1.68977e-12
TTCCGCC	-19	E072	4_Tx	1.07062	0.180722	3.13928e-09
CCGCCAT	-17	E073	15_Quies	-0.36464	0.0525748	4.04364e-12
ACTGAAT	-167	E073	15_Quies	-0.324385	0.0491211	4.00789e-11
CACGAGA	-111	E073	15_Quies	-0.332683	0.0523865	2.1455e-10
CCCCTTT	-79	E073	14_ReprPCWk	0.449447	0.0789478	1.24851e-08
TTATAAA	-94	E073	9_Het	-0.492949	0.08034	8.47375e-10
ACTGAAT	-167	E073	5_TxWk	0.709019	0.0668565	2.82191e-26
CCGCCAT	-17	E073	5_TxWk	0.618594	0.0727659	1.87719e-17
TCACGAG	-112	E073	5_TxWk	0.511964	0.0735409	3.36365e-12
ACTGAAT	-167	E073	4_Tx	1.10955	0.171148	8.99307e-11
TAACTGA	-169	E074	15_Quies	-0.402859	0.0537049	6.31622e-14
ATCCATG	-52	E074	9_Het	0.691209	0.0856512	7.02728e-16
AACTGAA	-168	E074	5_TxWk	0.722632	0.070118	6.62464e-25
GCCGCCA	-56	E074	5_TxWk	0.562785	0.0896465	3.43337e-10
AGCGTGA	82	E074	5_TxWk	0.513368	0.0867353	3.24313e-09
AGTCTCG	58	E074	5_TxWk	0.428879	0.0766629	2.21448e-08
AATAAGT	-120	E074	5_TxWk	-0.313693	0.0553376	1.4388e-08
ACTGAAT	-167	E074	4_Tx	1.05146	0.172275	1.03835e-09
TCTCACG	-114	E075	15_Quies	-0.50227	0.0600531	6.07478e-17
ACTGAAT	-167	E075	15_Quies	-0.501141	0.0589919	1.97784e-17
AATAAGT	-120	E075	15_Quies	0.342685	0.0476082	6.10852e-13
CCGCCAT	-17	E075	15_Quies	-0.416018	0.06425	9.48201e-11
GACGTGC	-34	E075	15_Quies	-0.561514	0.0907103	6.00904e-10
CACATGT	-199	E075	15_Quies	0.356241	0.0613783	6.47454e-09
CGAGATC	-109	E075	14_ReprPCWk	0.700688	0.103196	1.12243e-11
TCTTGAG	60	E075	14_ReprPCWk	1.5114	0.194134	6.95289e-15
GGCGGTT	-153	E075	14_ReprPCWk	1.80844	0.281621	1.34918e-10
ACTGAAT	-167	E075	5_TxWk	0.803502	0.0761074	4.69122e-26
CCGCCAT	-17	E075	5_TxWk	0.680178	0.083052	2.61707e-16
AATAAGT	-120	E075	5_TxWk	-0.397471	0.0674196	3.7358e-09
ACTGAAT	-167	E076	15_Quies	-0.553656	0.0559347	4.236e-23
TCACGAG	-112	E076	15_Quies	-0.389201	0.0607406	1.47833e-10
AGCGTGA	82	E076	15_Quies	-0.495032	0.0729007	1.11744e-11
CGGGTAT	63	E076	15_Quies	-0.41201	0.0699453	3.85106e-09
ACGTGCC	-33	E076	15_Quies	-0.512129	0.0881421	6.23729e-09
TCTCATG	-133	E076	15_Quies	0.265526	0.0453447	4.74929e-09
ACTGAAT	-167	E076	5_TxWk	0.461909	0.0727925	2.21622e-10
TCACGAG	-112	E076	5_TxWk	0.499337	0.0707155	1.65069e-12
CCGCCAT	-17	E076	5_TxWk	0.489232	0.0718989	1.01439e-11
AGCGTGA	82	E076	5_TxWk	0.54871	0.0849081	1.0306e-10
ATTGAAT	-167	E077	15_Quies	0.232415	0.0317329	2.40503e-13
TTTATAA	-95	E077	15_Quies	0.225683	0.0319504	1.62332e-12
CACGAGA	-111	E077	15_Quies	-0.273732	0.0465131	3.97934e-09
ACGTGCC	-33	E077	15_Quies	-0.397359	0.0696746	1.17669e-08
CTCACGA	-113	E077	14_ReprPCWk	0.590316	0.0669154	1.12595e-18
TACGTCT	67	E077	14_ReprPCWk	0.955174	0.118696	8.46879e-16
TTTATAA	-95	E077	9_Het	-0.327369	0.0499175	5.44618e-11
ATCCATG	-52	E077	9_Het	0.372247	0.06333	4.15513e-09
TCTCACG	-114	E077	9_Het	-0.491386	0.0826832	2.79864e-09
TCTCGTG	-133	E077	9_Het	-0.526177	0.0870693	1.51086e-09
ACTGAAT	-167	E077	5_TxWk	0.679716	0.0706467	6.49753e-22
ACGTGCC	-33	E077	5_TxWk	0.700696	0.10588	3.64474e-11
CCTTTCG	-28	E077	5_TxWk	0.739963	0.132702	2.45918e-08
ACTGAAT	-167	E077	4_Tx	0.895341	0.105255	1.79401e-17
TCCGCCA	-18	E077	4_Tx	0.926149	0.138729	2.45584e-11
ACTGAAT	-167	E078	15_Quies	-0.401749	0.0466774	7.5037e-18
CCGCCAT	-17	E078	15_Quies	-0.350157	0.0508038	5.48803e-12
TCACGAG	-112	E078	15_Quies	-0.333338	0.0500426	2.71833e-11
TTATAAA	-94	E078	9_Het	-0.421535	0.065018	8.97054e-11
ACTGAAT	-167	E078	5_TxWk	0.596735	0.0661895	1.95888e-19
CGCCATG	-16	E078	5_TxWk	0.538862	0.0743044	4.10406e-13
ACGAGAT	-110	E078	5_TxWk	0.445287	0.0741071	1.8703e-09
ACTGAAT	-167	E078	4_Tx	1.00082	0.121414	1.67866e-16
TCCGCCA	-18	E078	4_Tx	0.971289	0.159883	1.23975e-09
ACTGAAT	-167	E079	15_Quies	-0.386928	0.0464538	8.13216e-17
TCTCACG	-114	E079	15_Quies	-0.400661	0.0476682	4.27107e-17
AATAAGT	-120	E079	15_Quies	0.221704	0.0352937	3.34929e-10
CCGCCAT	-17	E079	15_Quies	-0.336177	0.0507088	3.36716e-11
CGGTTTC	-151	E079	14_ReprPCWk	0.892183	0.158409	1.77979e-08
TCCATGT	-51	E079	9_Het	0.557727	0.0642327	3.85773e-18
TCACGAG	-112	E079	5_TxWk	0.658976	0.0652213	5.32018e-24
AACTGAA	-168	E079	5_TxWk	0.684489	0.0673986	3.12141e-24
CCGCCAT	-17	E079	5_TxWk	0.590092	0.0674625	2.19188e-18
ATAAGTC	-119	E079	5_TxWk	-0.327598	0.0527024	5.09969e-10
GACGTGC	-34	E079	5_TxWk	0.569324	0.0982123	6.75665e-09
CGGGTAT	63	E079	5_TxWk	0.482705	0.078814	9.09023e-10
GGTAACT	-171	E079	4_Tx	1.24287	0.220617	1.76466e-08
CTCACGA	-113	E080	15_Quies	-0.335063	0.0428013	4.94376e-15
CGCCATG	-16	E080	15_Quies	-0.338595	0.0456124	1.14219e-13
ACGTGCC	-33	E080	15_Quies	-0.432267	0.0657278	4.81229e-11
CTCGGGT	61	E080	15_Quies	-0.321281	0.0503338	1.73644e-10
GGGAGGG	-189	E080	15_Quies	-0.188208	0.029485	1.73457e-10
AATAAGT	-120	E080	15_Quies	0.163694	0.029164	1.98971e-08
GAGTCCA	23	E080	14_ReprPCWk	0.218129	0.0388518	1.97261e-08
CTCACGA	-113	E080	14_ReprPCWk	0.323155	0.0496336	7.47468e-11
TACCCAG	53	E080	14_ReprPCWk	0.21029	0.037586	2.20759e-08
TACGTCT	67	E080	14_ReprPCWk	0.569941	0.0988242	8.05878e-09
TTCCCCC	-147	E080	14_ReprPCWk	0.266165	0.0467463	1.2422e-08
GGGAGGG	-189	E080	14_ReprPCWk	0.198479	0.0355674	2.4002e-08
ATCCATG	-52	E080	9_Het	0.804536	0.0649446	3.03366e-35
CCACGTG	9	E080	9_Het	-0.556315	0.0760927	2.6514e-13
AATTACC	50	E080	9_Het	-0.403332	0.0645551	4.16101e-10
AGACGTG	-45	E080	9_Het	-0.702972	0.115658	1.2169e-09
AACTGAA	-168	E080	5_TxWk	0.709166	0.0749072	2.87278e-21
CGCCATG	-16	E080	5_TxWk	0.517988	0.0801319	1.01838e-10
AGCAGCG	79	E080	5_TxWk	0.531956	0.0934998	1.27503e-08
ACTGAAT	-167	E080	4_Tx	0.922789	0.0986508	8.43173e-21
CCGCCAT	-17	E080	4_Tx	0.663283	0.110299	1.81553e-09
CTCGTGA	-132	E080	13_ReprPC	0.948644	0.16045	3.37187e-09
CCGCCAT	-17	E081	15_Quies	-0.39105	0.0515312	3.23344e-14
TCTCACG	-114	E081	15_Quies	-0.336578	0.049528	1.07783e-11
ACGTGCC	-33	E081	15_Quies	-0.503737	0.0745565	1.41417e-11
AGCGTGA	82	E081	15_Quies	-0.356875	0.0631371	1.58231e-08
ACGTGCC	-33	E081	14_ReprPCWk	0.619728	0.0987447	3.47251e-10
ACTGAAT	-167	E081	5_TxWk	0.605535	0.067687	3.68267e-19
CCGCCAT	-17	E081	5_TxWk	0.608006	0.0722403	3.881e-17
TCACGAG	-112	E081	5_TxWk	0.466561	0.0734693	2.14736e-10
GCGTGAA	83	E081	5_TxWk	0.602891	0.103048	4.89863e-09
ATCCATG	-52	E082	15_Quies	-0.392497	0.0447412	1.74552e-18
TTCCCTG	-75	E082	15_Quies	-0.257564	0.039574	7.59481e-11
ATTGAAT	-167	E082	15_Quies	0.205538	0.0326964	3.25202e-10
AAGACGT	-46	E082	14_ReprPCWk	0.516192	0.0879028	4.29781e-09
ATCCATG	-52	E082	9_Het	0.823919	0.057099	3.3679e-47
TTCCCTG	-75	E082	9_Het	0.43734	0.0523173	6.30524e-17
TCACGAG	-112	E082	9_Het	-0.657738	0.0875997	5.98327e-14
TAAGACG	-47	E082	9_Het	-0.642296	0.0970903	3.70413e-11
CCGCCAT	-17	E082	9_Het	-0.499305	0.0842136	3.0473e-09
TCACGAG	-112	E082	5_TxWk	0.584851	0.0769815	3.0241e-14
ATTGAAT	-167	E082	5_TxWk	-0.455379	0.060367	4.57469e-14
CCGCCAT	-17	E082	5_TxWk	0.53367	0.0793927	1.79363e-11
TCTTGAG	60	E082	5_TxWk	1.07862	0.170977	2.81631e-10
ACTGAAT	-167	E082	4_Tx	1.06717	0.129447	1.66462e-16
TCCGCCA	-18	E082	4_Tx	1.05265	0.16671	2.71421e-10
AGCGTGA	82	E082	4_Tx	0.940666	0.160716	4.8289e-09
TCACGAG	-112	E083	15_Quies	-0.38506	0.0525165	2.2647e-13
AGCGTGA	82	E083	15_Quies	-0.437313	0.0640986	8.9462e-12
CCGCCAT	-17	E083	15_Quies	-0.357147	0.0538313	3.25456e-11
CGGACTA	92	E083	15_Quies	-0.473797	0.0719935	4.66941e-11
TAACTGA	-169	E083	15_Quies	-0.329875	0.0560537	3.98088e-09
TAAGACG	-47	E083	15_Quies	-0.332483	0.0583646	1.22184e-08
TAACTGA	-169	E083	5_TxWk	0.620184	0.0686635	1.68208e-19
CGGACTA	92	E083	5_TxWk	0.548101	0.0906633	1.48994e-09
CCGCCAT	-17	E083	5_TxWk	0.438964	0.069075	2.08583e-10
GCGTGAA	83	E083	5_TxWk	0.558903	0.0961269	6.09191e-09
CCGCCAT	-17	E084	15_Quies	-0.311584	0.0468236	2.84404e-11
GACGTGC	-34	E084	15_Quies	-0.452985	0.0684366	3.61529e-11
TCGGGTA	62	E084	15_Quies	-0.314099	0.0532278	3.61237e-09
ACTGAAT	-167	E084	15_Quies	-0.265103	0.0435395	1.1376e-09
TCACGAG	-112	E084	15_Quies	-0.270793	0.0461831	4.53301e-09
GAGTCCA	23	E084	14_ReprPCWk	0.289927	0.0481853	1.77767e-09
ATCCATG	-52	E084	9_Het	0.691759	0.0768409	2.20664e-19
TGAATTG	-222	E084	9_Het	-0.4915	0.071606	6.69859e-12
ACTGAAT	-167	E084	5_TxWk	0.592417	0.0704597	4.17481e-17
CCGCCAT	-17	E084	5_TxWk	0.525825	0.0768609	7.85031e-12
TAAGACG	-47	E084	5_TxWk	0.554074	0.0816228	1.13524e-11
ACTGAAT	-167	E084	4_Tx	0.895946	0.098498	9.36425e-20
TCCGCCA	-18	E084	4_Tx	0.84585	0.133235	2.17371e-10
ATCCATG	-52	E084	8_ZNF/Rpts	1.22485	0.217585	1.80946e-08
ATCCATG	-52	E085	15_Quies	-0.444975	0.0429437	3.69838e-25
TTATAAA	-94	E085	15_Quies	0.248974	0.0304327	2.81234e-16
GATAATT	-170	E085	15_Quies	0.227948	0.038353	2.79169e-09
TCCCTGC	-74	E085	15_Quies	-0.220829	0.0370248	2.45604e-09
ATGTGCC	-33	E085	15_Quies	-0.252107	0.0442469	1.21404e-08
CCCCTTT	-79	E085	14_ReprPCWk	0.469452	0.0789654	2.76391e-09
ATCCATG	-52	E085	9_Het	0.573169	0.0518012	1.85925e-28
TAAGACG	-47	E085	9_Het	-0.794816	0.0737325	4.29163e-27
TTCCCTG	-75	E085	9_Het	0.344259	0.0416303	1.34598e-16
TTTATAA	-95	E085	9_Het	-0.303452	0.0409227	1.21393e-13
TGTAAGA	-49	E085	9_Het	0.296435	0.0392584	4.32301e-14
CCCCCAT	-145	E085	9_Het	-0.440306	0.0607729	4.32132e-13
ATGTGCC	-33	E085	9_Het	0.412208	0.0528084	5.91657e-15
CACGTGT	-199	E085	9_Het	-0.330452	0.0565329	5.05662e-09
TTGCTCC	-35	E085	9_Het	0.228891	0.0380497	1.79225e-09
TCTCGGG	60	E085	9_Het	-0.379461	0.0678973	2.28717e-08
AACTGTG	17	E085	9_Het	-0.23182	0.0411645	1.78607e-08
AACTGAA	-168	E085	5_TxWk	0.68233	0.0721088	3.00658e-21
TCACGAG	-112	E085	5_TxWk	0.565804	0.0714056	2.3034e-15
TAAGACG	-47	E085	5_TxWk	0.722981	0.0805964	2.95483e-19
CCGCCAT	-17	E085	5_TxWk	0.555903	0.0736041	4.26609e-14
GATCTCA	-106	E085	5_TxWk	0.745104	0.117974	2.68672e-10
GTCTCGG	59	E085	5_TxWk	0.553377	0.0809334	8.06197e-12
TGTAAGA	-49	E085	5_TxWk	-0.435191	0.0591623	1.89671e-13
TACGTCT	67	E085	5_TxWk	0.777558	0.131687	3.53488e-09
CTGAATC	-166	E085	4_Tx	0.917496	0.123755	1.22716e-13
CCTTCCG	-21	E085	4_Tx	1.12704	0.153381	2.01212e-13
ATCCATG	-52	E085	8_ZNF/Rpts	0.760132	0.107032	1.23024e-12
TCACGAG	-112	E086	15_Quies	-0.632361	0.0565278	4.736e-29
ACTGAAT	-167	E086	15_Quies	-0.587345	0.0542327	2.4794e-27
CCGCCAT	-17	E086	15_Quies	-0.47985	0.0592602	5.61747e-16
AGTCTCG	58	E086	15_Quies	-0.386912	0.0628943	7.66213e-10
AATAAGT	-120	E086	15_Quies	0.308051	0.0441367	2.96293e-12
AGCGTGA	82	E086	15_Quies	-0.411564	0.0724174	1.32185e-08
TCTCACG	-114	E086	5_TxWk	0.658884	0.0659605	1.70161e-23
CTGAATC	-166	E086	5_TxWk	0.4858	0.073877	4.83966e-11
CCGCCAT	-17	E086	5_TxWk	0.515923	0.0712748	4.53669e-13
ATTGAAT	-167	E086	5_TxWk	-0.359616	0.059387	1.4001e-09
ACTGAAT	-167	E086	4_Tx	0.98253	0.166816	3.86433e-09
CTTTATA	43	E087	14_ReprPCWk	0.281048	0.0469965	2.22878e-09
ATCCATG	-52	E087	9_Het	0.556951	0.0685236	4.36902e-16
TCCCTGC	-74	E087	9_Het	0.438439	0.0612626	8.26325e-13
TCACGAG	-112	E087	9_Het	-0.55242	0.097688	1.55905e-08
ACTGAAT	-167	E087	5_TxWk	0.699392	0.0723666	4.26438e-22
TTCCGCC	-19	E087	5_TxWk	0.596457	0.102013	5.00959e-09
CCGCCAT	-17	E088	15_Quies	-0.386105	0.0490813	3.64285e-15
ACTGAAT	-167	E088	15_Quies	-0.375002	0.045576	1.90256e-16
TCACGAG	-112	E088	15_Quies	-0.339392	0.0484213	2.39755e-12
GCGTGAA	83	E088	15_Quies	-0.478833	0.0711435	1.69048e-11
GACGTGC	-34	E088	15_Quies	-0.419365	0.0720908	5.98485e-09
CGCCTTC	-23	E088	15_Quies	-0.487216	0.0810658	1.85369e-09
AAAACGG	88	E088	15_Quies	-0.357595	0.0618339	7.33086e-09
TCGGGTA	62	E088	15_Quies	-0.324151	0.0563338	8.71002e-09
AGTAAAT	-124	E088	15_Quies	0.560969	0.099477	1.70864e-08
ATCCATG	-52	E088	9_Het	0.608802	0.0992057	8.42182e-10
ACTGAAT	-167	E088	5_TxWk	0.521667	0.0608321	9.86299e-18
TCACGAG	-112	E088	5_TxWk	0.43522	0.0653097	2.66576e-11
CCGCCAT	-17	E088	5_TxWk	0.444208	0.066417	2.25996e-11
CGCCTTC	-23	E088	5_TxWk	0.602252	0.103415	5.75729e-09
TAAGACG	-47	E088	5_TxWk	0.415348	0.0719208	7.69201e-09
ACTGAAT	-167	E088	4_Tx	0.871303	0.114489	2.73299e-14
CCGCCAT	-17	E088	4_Tx	0.768057	0.124175	6.19832e-10
ACGTGCC	-33	E089	15_Quies	-0.562946	0.0681723	1.48502e-16
ACGAGAT	-110	E089	15_Quies	-0.373474	0.0472294	2.62267e-15
CCGCCAT	-17	E089	15_Quies	-0.330915	0.0470765	2.0757e-12
AATAAGT	-120	E089	15_Quies	0.251631	0.0323671	7.58765e-15
ACTGAAT	-167	E089	15_Quies	-0.305277	0.043695	2.81753e-12
AGTCTCG	58	E089	15_Quies	-0.308085	0.049133	3.60078e-10
ACATGTC	-198	E089	15_Quies	0.361958	0.060081	1.69639e-09
ACGTGCC	-33	E089	14_ReprPCWk	0.591539	0.0855077	4.58167e-12
TACGTCT	67	E089	14_ReprPCWk	0.852916	0.110829	1.40648e-14
GAGTCCA	23	E089	14_ReprPCWk	0.305488	0.0486314	3.34882e-10
CGAGATC	-109	E089	14_ReprPCWk	0.389808	0.0640694	1.17108e-09
TCTCGTG	-133	E089	14_ReprPCWk	0.356587	0.0622172	9.96547e-09
TTTAAAA	-100	E089	14_ReprPCWk	-0.411592	0.0644815	1.73537e-10
TTATAAA	-94	E089	9_Het	-0.399901	0.0601943	3.06319e-11
TAAATTT	48	E089	9_Het	0.754352	0.12865	4.52969e-09
TCTCACG	-114	E089	9_Het	-0.625546	0.109615	1.1517e-08
TCTCGTG	-133	E089	9_Het	-0.637019	0.114215	2.4415e-08
ACTGAAT	-167	E089	5_TxWk	0.583236	0.0706075	1.45359e-16
ACGAGAT	-110	E089	5_TxWk	0.544771	0.0766247	1.16378e-12
CGCCATG	-16	E089	5_TxWk	0.541875	0.0787028	5.77557e-12
CGTGCCT	-32	E089	5_TxWk	0.609446	0.106915	1.19592e-08
ACTGAAT	-167	E089	4_Tx	1.06594	0.0970953	4.86011e-28
TCTCATG	-133	E089	4_Tx	-0.568782	0.0900996	2.73998e-10
TTATAAA	-94	E090	15_Quies	0.254218	0.0299096	1.9036e-17
TCTCACG	-114	E090	15_Quies	-0.279652	0.0423427	3.989e-11
CGCCATG	-16	E090	15_Quies	-0.306173	0.0465855	4.95495e-11
ACTGAAT	-167	E090	15_Quies	-0.259665	0.0412508	3.07814e-10
ACGTGCC	-33	E090	15_Quies	-0.419039	0.06662	3.17472e-10
TACGTCT	67	E090	14_ReprPCWk	0.864273	0.112164	1.3042e-14
ACGTGCC	-33	E090	14_ReprPCWk	0.566592	0.0880111	1.21272e-10
CGAGATC	-109	E090	14_ReprPCWk	0.438739	0.0645773	1.09064e-11
CCACGTG	9	E090	14_ReprPCWk	0.32024	0.0523891	9.79477e-10
TTATAAA	-94	E090	9_Het	-0.428038	0.0480161	4.90156e-19
TCCATGT	-51	E090	9_Het	0.391687	0.0544289	6.18643e-13
TAAGACG	-47	E090	9_Het	-0.705381	0.0971649	3.8818e-13
TCACGAG	-112	E090	9_Het	-0.553787	0.0822201	1.63457e-11
TGAAAAT	86	E090	9_Het	0.306479	0.0492884	5.03248e-10
CCACGTG	9	E090	9_Het	-0.363129	0.0580705	4.02017e-10
TCCCTGC	-74	E090	9_Het	0.305455	0.0527697	7.10387e-09
TCTCGTG	-133	E090	9_Het	-0.449488	0.0795255	1.58482e-08
AACTGAA	-168	E090	5_TxWk	0.544312	0.0714859	2.65196e-14
TCACGAG	-112	E090	5_TxWk	0.514014	0.0701503	2.34786e-13
CGCCATG	-16	E090	5_TxWk	0.481274	0.0744381	1.01015e-10
TAAGACG	-47	E090	5_TxWk	0.468573	0.0773218	1.36082e-09
ACTGAAT	-167	E090	4_Tx	1.11934	0.0950259	4.98806e-32
CCTTCCG	-21	E090	4_Tx	0.837067	0.137938	1.29181e-09
AGCGTGA	82	E090	4_Tx	0.719256	0.127858	1.85053e-08
TAAATTA	48	E091	15_Quies	0.217161	0.0314546	5.05823e-12
ATTGAAT	-167	E091	15_Quies	0.189027	0.0305699	6.27115e-10
CCGCCAT	-17	E091	15_Quies	-0.2562	0.0456858	2.04846e-08
TACGTCT	67	E091	14_ReprPCWk	1.02409	0.125827	3.99143e-16
TCACGAG	-112	E091	14_ReprPCWk	0.528157	0.0739167	8.98027e-13
GAGTCCA	23	E091	14_ReprPCWk	0.349005	0.0603487	7.33197e-09
TTTTAAA	-101	E091	14_ReprPCWk	-0.515548	0.0854485	1.60516e-09
ATCCATG	-52	E091	9_Het	0.456656	0.052028	1.67708e-18
AATTACC	50	E091	9_Het	-0.254275	0.0440664	7.91478e-09
CTCACGA	-113	E091	9_Het	-0.375808	0.0667211	1.77583e-08
CCCCATA	-144	E091	9_Het	-0.351243	0.0629549	2.41512e-08
CGCCATG	-16	E091	5_TxWk	0.566977	0.0795406	1.01729e-12
ACTGAAT	-167	E091	5_TxWk	0.524383	0.0728014	5.89345e-13
TCTCGGG	60	E091	5_TxWk	0.50189	0.0874449	9.49533e-09
ACTGAAT	-167	E091	4_Tx	0.967243	0.118629	3.53407e-16
TCACGAG	-112	E092	15_Quies	-0.465252	0.0450408	5.17924e-25
CCGCCAT	-17	E092	15_Quies	-0.409659	0.0461087	6.41259e-19
TAATTGA	-169	E092	15_Quies	0.288216	0.0320074	2.16346e-19
ACGTGCC	-33	E092	15_Quies	-0.505904	0.0680662	1.06541e-13
CAGCGTG	81	E092	15_Quies	-0.38807	0.0570186	1.00327e-11
TGTCGTG	-195	E092	15_Quies	-0.600124	0.089244	1.76156e-11
ACATGTC	-198	E092	15_Quies	0.379911	0.0591507	1.33815e-10
AGTCTCG	58	E092	15_Quies	-0.286529	0.0486016	3.73643e-09
AATTAAA	28	E092	15_Quies	0.268593	0.0431444	4.80195e-10
AAAAATG	-97	E092	15_Quies	0.326784	0.0577867	1.55854e-08
AAATAAG	-121	E092	15_Quies	0.540055	0.0941303	9.6188e-09
TCACGAG	-112	E092	14_ReprPCWk	0.473405	0.0626673	4.21272e-14
GAGTCCA	23	E092	14_ReprPCWk	0.345273	0.0497467	3.90378e-12
TACGTCT	67	E092	14_ReprPCWk	0.805988	0.114807	2.21307e-12
ACGTGCC	-33	E092	14_ReprPCWk	0.553612	0.0896508	6.60772e-10
TCTCGTG	-133	E092	14_ReprPCWk	0.374019	0.0641854	5.63779e-09
TATAAAT	47	E092	9_Het	-0.450161	0.0707366	1.96686e-10
TGTAGCT	-217	E092	9_Het	-0.423768	0.0749183	1.54581e-08
ACTGAAT	-167	E092	5_TxWk	0.553963	0.0619288	3.714e-19
CCGCCAT	-17	E092	5_TxWk	0.466015	0.0677937	6.24197e-12
CACGAGA	-111	E092	5_TxWk	0.434871	0.0677099	1.33999e-10
ACTGAAT	-167	E092	4_Tx	0.864165	0.0959922	2.20751e-19
CCGCCAT	-17	E092	4_Tx	0.688745	0.104843	5.05434e-11
AGCGTGA	82	E092	4_Tx	0.723956	0.123351	4.38201e-09
ATTGAAT	-167	E093	15_Quies	0.248279	0.0383914	9.99364e-11
CCGCCAT	-17	E093	15_Quies	-0.373291	0.0546639	8.56008e-12
TTTATAA	-95	E093	15_Quies	0.230899	0.0384775	1.96254e-09
ATCCATG	-52	E093	9_Het	0.442046	0.0768192	8.6967e-09
ACTGAAT	-167	E093	5_TxWk	0.538266	0.0836549	1.23994e-10
ACTGAAT	-167	E093	4_Tx	0.788996	0.108922	4.36584e-13
CCGCCAT	-17	E093	4_Tx	0.71859	0.116962	8.05712e-10
TGTTCCT	-34	E093	8_ZNF/Rpts	2.36861	0.300174	3.00258e-15
ACTGAAT	-167	E094	15_Quies	-0.376382	0.060486	4.88883e-10
CCGCCAT	-17	E094	15_Quies	-0.501541	0.054574	3.9245e-20
CGAGATC	-109	E094	15_Quies	-0.497134	0.0559586	6.45249e-19
AATAAGT	-120	E094	15_Quies	0.246835	0.040064	7.2277e-10
CATCCAT	-53	E094	9_Het	0.604831	0.096119	3.12344e-10
TCACGAG	-112	E094	5_TxWk	0.629889	0.0605377	2.35492e-25
CTGAATC	-166	E094	5_TxWk	0.431468	0.0665541	8.99421e-11
CCGCCAT	-17	E094	5_TxWk	0.594778	0.0619839	8.33627e-22
ATTGAAT	-167	E094	5_TxWk	-0.331553	0.0519288	1.71656e-10
AGCAGCG	79	E094	5_TxWk	0.459212	0.0776036	3.27062e-09
TACGTCT	67	E094	5_TxWk	0.669466	0.119128	1.91297e-08
ATGACTG	-12	E094	4_Tx	1.38076	0.227923	1.3781e-09
TAACTGA	-169	E095	15_Quies	-0.289792	0.0457081	2.29691e-10
CGGACTA	92	E095	15_Quies	-0.34797	0.0614799	1.51464e-08
TTCCCCC	-147	E095	14_ReprPCWk	0.302403	0.0531464	1.27032e-08
CATCCAT	-53	E095	9_Het	0.482741	0.0661792	2.999e-13
TTCCCTG	-75	E095	9_Het	0.438998	0.0600608	2.687e-13
ACTGAAT	-167	E095	5_TxWk	0.586307	0.0566665	4.33453e-25
CCGCCAT	-17	E095	5_TxWk	0.462848	0.0624752	1.27732e-13
TCACGAG	-112	E095	5_TxWk	0.35829	0.062974	1.27412e-08
ACTGAAT	-167	E095	4_Tx	1.02749	0.117295	1.95407e-18
TCTCATG	-133	E095	4_Tx	-0.610874	0.108982	2.07954e-08
TTATAAA	-94	E096	15_Quies	0.273681	0.0340973	1.00316e-15
ACTGAAT	-167	E096	15_Quies	-0.336835	0.0439297	1.75263e-14
CGCCATG	-16	E096	15_Quies	-0.376739	0.0497042	3.46545e-14
CGAGATC	-109	E096	15_Quies	-0.331454	0.0486681	9.72612e-12
ATCCATG	-52	E096	15_Quies	-0.266637	0.0465263	9.9906e-09
ATCCATG	-52	E096	9_Het	0.466248	0.0554758	4.29607e-17
TTATAAA	-94	E096	9_Het	-0.402376	0.0452084	5.56164e-19
TCACGAG	-112	E096	5_TxWk	0.539428	0.0675164	1.35401e-15
AACTGAA	-168	E096	5_TxWk	0.67082	0.0674153	2.50783e-23
CCGCCAT	-17	E096	5_TxWk	0.550278	0.068063	6.22475e-16
TACGTCT	67	E096	5_TxWk	0.733073	0.125499	5.18008e-09
GATCTCA	-106	E096	5_TxWk	0.677013	0.113449	2.40823e-09
ACTGAAT	-167	E096	4_Tx	1.04201	0.138995	6.54271e-14
ACTGAAT	-167	E097	15_Quies	-0.500962	0.0451912	1.47704e-28
CCGCCAT	-17	E097	15_Quies	-0.354333	0.0498689	1.20069e-12
TCACGAG	-112	E097	15_Quies	-0.327301	0.0491697	2.80303e-11
AGCGTGA	82	E097	15_Quies	-0.393707	0.0603865	7.04037e-11
CGGGTAT	63	E097	15_Quies	-0.325643	0.0574	1.40134e-08
ACTGAAT	-167	E097	5_TxWk	0.574369	0.056846	5.30635e-24
CGCCATG	-16	E097	5_TxWk	0.478076	0.0644357	1.17624e-13
AGCAGCG	79	E097	5_TxWk	0.464755	0.0761289	1.02898e-09
GTCTCGG	59	E097	5_TxWk	0.416381	0.0699892	2.69427e-09
CGCCTTC	-23	E097	5_TxWk	0.572745	0.099304	8.04101e-09
ACTGAAT	-167	E097	4_Tx	0.915446	0.120732	3.38974e-14
ATCCATG	-52	E097	8_ZNF/Rpts	1.4031	0.247664	1.46724e-08
ACTGAAT	-167	E098	15_Quies	-0.325461	0.053221	9.63939e-10
TTTATAA	-95	E098	15_Quies	0.2338	0.0348891	2.06671e-11
CCGCCAT	-17	E098	15_Quies	-0.394754	0.0489298	7.15966e-16
CTCCTCC	-31	E098	15_Quies	-0.244314	0.0377915	1.01445e-10
TCACGAG	-112	E098	15_Quies	-0.312831	0.0484782	1.09635e-10
AGACGTG	-45	E098	15_Quies	-0.317242	0.0520164	1.06806e-09
TGAATAA	-122	E098	15_Quies	0.216633	0.0347209	4.3966e-10
GCAGCGT	80	E098	15_Quies	-0.342968	0.0603995	1.36015e-08
CATCCAT	-53	E098	9_Het	0.601193	0.0637831	4.27668e-21
CTCCTCC	-31	E098	9_Het	0.320646	0.0568323	1.68114e-08
ACTGAAT	-167	E098	5_TxWk	0.557627	0.0544921	1.40827e-24
CCGCCAT	-17	E098	5_TxWk	0.513015	0.0589044	3.05808e-18
TCACGAG	-112	E098	5_TxWk	0.4348	0.0586349	1.21279e-13
GCAGCGT	80	E098	5_TxWk	0.493421	0.0715971	5.51581e-12
ACGTGCC	-33	E098	5_TxWk	0.571592	0.0858359	2.75456e-11
GTCTCGG	59	E098	5_TxWk	0.396976	0.0667658	2.75114e-09
AATAAGT	-120	E098	5_TxWk	-0.261212	0.0439477	2.78644e-09
GATCTCA	-106	E098	5_TxWk	0.580041	0.100613	8.16306e-09
CGAGATC	-109	E098	4_Tx	1.34774	0.166745	6.33892e-16
TGTTCCT	-34	E098	4_Tx	2.03833	0.266327	1.95625e-14
ATTGAAT	-167	E098	4_Tx	-1.16979	0.170374	6.60228e-12
ACTGAAT	-167	E099	15_Quies	-0.510624	0.0591097	5.69103e-18
CCGCCAT	-17	E099	15_Quies	-0.405902	0.0648555	3.88541e-10
AGCTCCC	-214	E099	14_ReprPCWk	0.532924	0.0895383	2.65026e-09
ACTGAAT	-167	E099	5_TxWk	0.666275	0.0722855	3.04726e-20
CCGCCAT	-17	E099	5_TxWk	0.499422	0.0807327	6.16673e-10
TCTCACG	-114	E099	5_TxWk	0.457237	0.0781265	4.84199e-09
ACTGAAT	-167	E100	15_Quies	-0.425148	0.0462087	3.55942e-20
TTTCCCT	-76	E100	9_Het	0.465216	0.0723281	1.25919e-10
ACTGAAT	-167	E100	5_TxWk	0.749244	0.0591747	9.65469e-37
CCGCCAT	-17	E100	5_TxWk	0.485902	0.0669237	3.85548e-13
CTCACGA	-113	E100	5_TxWk	0.430571	0.0663873	8.82913e-11
CGGGTAT	63	E100	5_TxWk	0.449457	0.0764345	4.09557e-09
AATAAGT	-120	E100	5_TxWk	-0.28469	0.0503794	1.59592e-08
TCACGAG	-112	E101	15_Quies	-0.434062	0.051262	2.50681e-17
ACTGAAT	-167	E101	15_Quies	-0.404839	0.0487564	1.01264e-16
CCGCCAT	-17	E101	15_Quies	-0.347143	0.0530316	5.91097e-11
ACGTGCC	-33	E101	15_Quies	-0.496585	0.076053	6.60065e-11
TAAAAAT	-98	E101	15_Quies	0.473746	0.0727842	7.56953e-11
AATAAGT	-120	E101	15_Quies	0.241612	0.0374864	1.15356e-10
TACGTCT	67	E101	14_ReprPCWk	0.895442	0.128061	2.70367e-12
TCTCACG	-114	E101	14_ReprPCWk	0.519363	0.0715637	3.94765e-13
ACTGAAT	-167	E101	5_TxWk	0.676535	0.0711351	1.89615e-21
CCGCCAT	-17	E101	5_TxWk	0.49493	0.0790016	3.73274e-10
TCTCATG	-133	E101	5_TxWk	-0.352168	0.0600609	4.53196e-09
CGCCTTC	-23	E101	5_TxWk	0.721628	0.119225	1.42473e-09
CCCACGT	-200	E101	5_TxWk	0.469085	0.0781478	1.94254e-09
GACGTGC	-34	E101	5_TxWk	0.640518	0.109658	5.18718e-09
ACTGAAT	-167	E101	4_Tx	0.961706	0.107867	4.85003e-19
TCCGCCA	-18	E101	4_Tx	0.989518	0.139978	1.55957e-12
ACTGAAT	-167	E102	15_Quies	-0.392804	0.0491354	1.30292e-15
CGTGCCT	-32	E102	15_Quies	-0.505361	0.076012	2.96222e-11
CTCACGA	-113	E102	15_Quies	-0.301888	0.0527352	1.03671e-08
CCGCCAT	-17	E102	15_Quies	-0.30361	0.0539714	1.85093e-08
ACTGAAT	-167	E102	5_TxWk	0.667475	0.0687198	2.65451e-22
CCGCCAT	-17	E102	5_TxWk	0.513689	0.0762186	1.58732e-11
ACTGAAT	-167	E102	4_Tx	0.986369	0.117856	5.79851e-17
TCCGCCA	-18	E102	4_Tx	1.03247	0.151756	1.02101e-11
ACTGAAT	-167	E103	15_Quies	-0.488209	0.0543635	2.6964e-19
TCACGAG	-112	E103	15_Quies	-0.420718	0.0580457	4.22806e-13
CCGCCAT	-17	E103	15_Quies	-0.420441	0.0592455	1.27865e-12
AGACGTG	-45	E103	15_Quies	-0.417614	0.0620733	1.72299e-11
CCACGTG	9	E103	15_Quies	-0.28477	0.0484271	4.09286e-09
CCACGTG	9	E103	14_ReprPCWk	0.58324	0.092003	2.30735e-10
ACTGAAT	-167	E103	5_TxWk	0.708363	0.0654544	2.70081e-27
TCACGAG	-112	E103	5_TxWk	0.491466	0.0723034	1.06614e-11
CCGCCAT	-17	E103	5_TxWk	0.500038	0.0735323	1.04438e-11
AGACGTG	-45	E103	5_TxWk	0.466137	0.077765	2.04525e-09
AGACGTG	-45	E104	15_Quies	-0.300142	0.0537849	2.39954e-08
TTATAAA	-94	E104	9_Het	-0.415443	0.0713748	5.86419e-09
CGCCATG	-16	E104	5_TxWk	0.545046	0.0729451	7.89846e-14
CACGAGA	-111	E104	5_TxWk	0.474212	0.0708695	2.21139e-11
AACGGAC	90	E104	5_TxWk	0.538713	0.0926761	6.14164e-09
CCGCCAT	-17	E105	15_Quies	-0.439943	0.0497243	8.9391e-19
TCACGAG	-112	E105	15_Quies	-0.404326	0.049165	1.97075e-16
ATTGAAT	-167	E105	15_Quies	0.236316	0.0351307	1.73473e-11
ACGTGCC	-33	E105	15_Quies	-0.443533	0.0737374	1.79843e-09
AGCGTGA	82	E105	15_Quies	-0.353174	0.0613589	8.61998e-09
GAGTCCA	23	E105	14_ReprPCWk	0.35862	0.0600009	2.27406e-09
ACTGAAT	-167	E105	5_TxWk	0.405038	0.0655146	6.31338e-10
CCGCCAT	-17	E105	5_TxWk	0.626197	0.0633432	4.79825e-23
TCACGAG	-112	E105	5_TxWk	0.569492	0.0631199	1.84028e-19
TACGTCT	67	E105	5_TxWk	0.809979	0.118573	8.4294e-12
ATTGAAT	-167	E105	5_TxWk	-0.377038	0.0538554	2.54265e-12
GCGTGAA	83	E105	4_Tx	1.42214	0.242194	4.30832e-09
CACGAGA	-111	E106	15_Quies	-0.304877	0.0444274	6.77294e-12
GACGTGC	-34	E106	15_Quies	-0.42189	0.0664076	2.11116e-10
ACTGAAT	-167	E106	15_Quies	-0.250867	0.0416622	1.72854e-09
CCGCCAT	-17	E106	15_Quies	-0.252732	0.0451468	2.16823e-08
TGAGTCC	22	E106	14_ReprPCWk	0.29075	0.040973	1.28309e-12
TACGTCT	67	E106	14_ReprPCWk	0.710673	0.101626	2.69041e-12
TCTCACG	-114	E106	14_ReprPCWk	0.353731	0.0518658	9.09701e-12
AATTACC	50	E106	9_Het	-0.429112	0.0619715	4.38018e-12
ACTGAAT	-167	E106	5_TxWk	0.754486	0.0650114	3.86671e-31
CCGCCAT	-17	E106	5_TxWk	0.506131	0.0734038	5.38049e-12
GCGTGAA	83	E106	5_TxWk	0.579779	0.10379	2.32279e-08
ACTGAAT	-167	E106	4_Tx	0.881149	0.124152	1.27198e-12
TCACGAG	-112	E107	15_Quies	-0.472748	0.0476343	3.25665e-23
CCGCCAT	-17	E107	15_Quies	-0.472105	0.0484343	1.89389e-22
ACGTGCC	-33	E107	15_Quies	-0.570945	0.0705981	6.10272e-16
GCAGCGT	80	E107	15_Quies	-0.426652	0.0596645	8.62365e-13
ATTGAAT	-167	E107	15_Quies	0.225419	0.0342791	4.83279e-11
GTTCTCG	-135	E107	15_Quies	-0.349551	0.0519313	1.68476e-11
AGTCTCG	58	E107	15_Quies	-0.349513	0.0512671	9.2639e-12
AAAAATG	-97	E107	15_Quies	0.49692	0.0666413	8.87583e-14
AATTAAA	28	E107	15_Quies	0.26652	0.0469035	1.32889e-08
AATAAGT	-120	E107	15_Quies	0.192515	0.0345221	2.45308e-08
TACGTCT	67	E107	14_ReprPCWk	0.876028	0.110681	2.47403e-15
GAGTCCA	23	E107	14_ReprPCWk	0.2856	0.0491884	6.38876e-09
ACGTGCC	-33	E107	14_ReprPCWk	0.515092	0.0883862	5.61836e-09
CTGAATC	-166	E107	5_TxWk	0.720816	0.0670156	5.5569e-27
CGCCATG	-16	E107	5_TxWk	0.559124	0.073103	2.03443e-14
CACGAGA	-111	E107	5_TxWk	0.446473	0.0723188	6.67224e-10
GTCTCGG	59	E107	5_TxWk	0.452721	0.0805552	1.90946e-08
ACTGAAT	-167	E107	4_Tx	1.01848	0.13999	3.45448e-13
CCGCCAT	-17	E108	15_Quies	-0.45151	0.0497668	1.16307e-19
GACGTGC	-34	E108	15_Quies	-0.546352	0.0723136	4.1786e-14
TCACGAG	-112	E108	15_Quies	-0.311095	0.0499253	4.62849e-10
ACTGAAT	-167	E108	15_Quies	-0.321463	0.047131	9.06454e-12
GCAGCGT	80	E108	15_Quies	-0.383597	0.0616536	4.91461e-10
CCACGTG	9	E108	15_Quies	-0.24851	0.0405892	9.20804e-10
CTCGGGT	61	E108	15_Quies	-0.337925	0.057788	4.9851e-09
AATTTCC	50	E108	15_Quies	0.440116	0.0750882	4.5921e-09
GAGTCCA	23	E108	14_ReprPCWk	0.324031	0.0544772	2.71429e-09
TCTCGTG	-133	E108	14_ReprPCWk	0.415118	0.069421	2.23518e-09
CCGCCAT	-17	E108	5_TxWk	0.607801	0.0689662	1.2182e-18
ACTGAAT	-167	E108	5_TxWk	0.524021	0.065804	1.67433e-15
ACTGAAT	-167	E108	4_Tx	1.14271	0.120699	2.86823e-21
TCCGCCA	-18	E108	4_Tx	0.918114	0.164594	2.43222e-08
ACGTGCC	-33	E109	15_Quies	-0.441361	0.0673109	5.48832e-11
GCCTCCC	-1	E109	15_Quies	-0.199409	0.0310262	1.30036e-10
CGCCATG	-16	E109	15_Quies	-0.280171	0.0477703	4.49238e-09
CCACGTG	9	E109	15_Quies	-0.216003	0.0361949	2.40483e-09
GTCCCCA	-243	E109	15_Quies	-0.186458	0.031209	2.30802e-09
TAAAAAT	-98	E109	15_Quies	0.320378	0.056892	1.7882e-08
GAGTCCA	23	E109	14_ReprPCWk	0.271435	0.036767	1.55267e-13
CCAAATC	-235	E109	14_ReprPCWk	0.211474	0.0356964	3.13774e-09
AACTGAA	-168	E109	5_TxWk	0.869827	0.0746993	2.45133e-31
CCGCCAT	-17	E109	5_TxWk	0.468726	0.0804619	5.69612e-09
CCGCCAT	-17	E110	15_Quies	-0.42586	0.0571089	8.85341e-14
ACGTGCC	-33	E110	15_Quies	-0.587686	0.0804122	2.70313e-13
CTCACGA	-113	E110	15_Quies	-0.381196	0.0563615	1.34777e-11
GTTCTCG	-135	E110	15_Quies	-0.340531	0.0609629	2.32521e-08
ACTGAAT	-167	E110	15_Quies	-0.314367	0.0544081	7.56207e-09
TAAAAAT	-98	E110	15_Quies	0.466176	0.0831335	2.05202e-08
ACGTGCC	-33	E110	14_ReprPCWk	0.628456	0.107694	5.35996e-09
ACTGAAT	-167	E110	5_TxWk	0.545113	0.072402	5.11379e-14
CCGCCAT	-17	E110	5_TxWk	0.50812	0.0782127	8.21275e-11
CACGAGA	-111	E111	15_Quies	-0.485076	0.0453541	1.07073e-26
CGCCATG	-16	E111	15_Quies	-0.416446	0.0478815	3.39464e-18
ACGTGCC	-33	E111	15_Quies	-0.588892	0.0675076	2.70086e-18
GCAGCGT	80	E111	15_Quies	-0.41536	0.0566655	2.30112e-13
AGTCTCG	58	E111	15_Quies	-0.323861	0.0484224	2.25859e-11
ATTGAAT	-167	E111	15_Quies	0.201848	0.0316498	1.79955e-10
TAAATAA	-122	E111	15_Quies	0.564544	0.0928709	1.21078e-09
GTTCTCG	-135	E111	15_Quies	-0.27931	0.0493727	1.53887e-08
CGTGCCT	-32	E111	14_ReprPCWk	0.551014	0.0815801	1.43553e-11
CACGAGA	-111	E111	14_ReprPCWk	0.378054	0.0581203	7.7856e-11
TACGTCT	67	E111	14_ReprPCWk	0.655902	0.109747	2.27963e-09
AACTGAA	-168	E111	5_TxWk	0.64096	0.0690352	1.62408e-20
CCGCCAT	-17	E111	5_TxWk	0.538585	0.0697676	1.16604e-14
CTCACGA	-113	E111	5_TxWk	0.441041	0.0701028	3.14714e-10
GTCTCGG	59	E111	5_TxWk	0.453753	0.0789728	9.15489e-09
ACTGAAT	-167	E111	4_Tx	0.941581	0.10975	9.5419e-18
CCGCCAT	-17	E111	4_Tx	0.724137	0.120441	1.8285e-09
AGGTAAC	-172	E112	15_Quies	-0.458843	0.0699367	5.35057e-11
CCGCCAT	-17	E112	15_Quies	-0.375576	0.0539693	3.42563e-12
TCTCACG	-114	E112	15_Quies	-0.348635	0.051781	1.66343e-11
AAAACGG	88	E112	15_Quies	-0.381078	0.067444	1.60177e-08
ATTGAAT	-167	E112	15_Quies	0.233521	0.0400572	5.55269e-09
AGGTAAC	-172	E112	5_TxWk	0.734214	0.0918684	1.32746e-15
CTGAATC	-166	E112	4_Tx	0.972352	0.123445	3.35838e-15
ACTGAAT	-167	E113	15_Quies	-0.411331	0.0492818	7.0317e-17
TCACGAG	-112	E113	15_Quies	-0.369872	0.0526054	2.04968e-12
AATAAGT	-120	E113	15_Quies	0.247598	0.0382365	9.45289e-11
CGCCATG	-16	E113	15_Quies	-0.377269	0.0559134	1.50527e-11
TAAATTA	48	E113	15_Quies	0.255386	0.0394465	9.52845e-11
GACGTGC	-34	E113	15_Quies	-0.451626	0.0784242	8.47311e-09
ATCCATG	-52	E113	9_Het	0.6912	0.0667848	4.19978e-25
TCACGAG	-112	E113	5_TxWk	0.613225	0.0664061	2.59566e-20
AACTGAA	-168	E113	5_TxWk	0.436479	0.0756885	8.07965e-09
CGCCATG	-16	E113	5_TxWk	0.545753	0.0710529	1.57924e-14
GTCTCGG	59	E113	5_TxWk	0.516826	0.0762515	1.21927e-11
TACGTCT	67	E113	5_TxWk	0.705174	0.125266	1.80818e-08
TAAGACG	-47	E113	5_TxWk	0.436923	0.0759498	8.77841e-09
ACTGAAT	-167	E113	4_Tx	1.06983	0.16349	6.00168e-11
CCACGTG	9	E114	15_Quies	-0.229	0.0369134	5.51417e-10
CGCCATG	-16	E114	15_Quies	-0.304441	0.0485334	3.54593e-10
CTCACGA	-113	E114	15_Quies	-0.267356	0.0458504	5.50801e-09
GACGTGC	-34	E114	15_Quies	-0.407394	0.0685848	2.85005e-09
AGCGTGA	82	E114	15_Quies	-0.341169	0.0568124	1.91103e-09
TTATAAA	-94	E114	14_ReprPCWk	0.275106	0.0394868	3.23726e-12
CCACGTG	9	E114	14_ReprPCWk	0.258527	0.0448529	8.21972e-09
AACTGAA	-168	E114	5_TxWk	0.602762	0.0753233	1.22082e-15
CTTCCGC	-20	E114	5_TxWk	0.685331	0.0939196	2.94253e-13
ACTGAAT	-167	E114	4_Tx	0.935322	0.132863	1.92575e-12
CACGAGA	-111	E115	15_Quies	-0.294967	0.0441439	2.35791e-11
GAGTCCA	23	E115	14_ReprPCWk	0.290746	0.0423686	6.77562e-12
CACGAGA	-111	E115	14_ReprPCWk	0.341898	0.0558414	9.20233e-10
TTCCCTG	-75	E115	14_ReprPCWk	-0.331448	0.054517	1.20397e-09
ATCCATG	-52	E115	9_Het	0.745536	0.0590754	1.63665e-36
TCCCTGC	-74	E115	9_Het	0.381951	0.055292	4.91929e-12
GATGTGC	-34	E115	9_Het	0.427811	0.0686404	4.58628e-10
ACTGAAT	-167	E115	5_TxWk	0.524031	0.0873086	1.94839e-09
CTGAATC	-166	E115	4_Tx	0.997184	0.108257	3.22243e-20
ACGAGAT	-110	E115	4_Tx	0.76109	0.114298	2.76061e-11
CTTCCGC	-20	E115	4_Tx	0.915874	0.139663	5.46296e-11
TCTCATG	-133	E115	4_Tx	-0.580742	0.0979089	3.00262e-09
CATCCAT	-53	E115	8_ZNF/Rpts	0.954375	0.158537	1.74545e-09
AGACGTG	-45	E116	15_Quies	-0.458135	0.0488528	6.73201e-21
CCACGTG	9	E116	15_Quies	-0.257997	0.0376801	7.54009e-12
GTCCCCA	-243	E116	15_Quies	-0.218896	0.0329025	2.87409e-11
AACTGAA	-168	E116	15_Quies	-0.326323	0.048055	1.11657e-11
CGGGTAT	63	E116	15_Quies	-0.351423	0.0542627	9.3981e-11
GCAGCGT	80	E116	15_Quies	-0.345008	0.0582782	3.21908e-09
TTCTCGT	-134	E116	15_Quies	-0.280788	0.0475208	3.44729e-09
AAAACGG	88	E116	15_Quies	-0.349918	0.0596198	4.38007e-09
CCATGTA	-52	E116	15_Quies	-0.191894	0.0326466	4.15479e-09
CCACGTG	9	E116	14_ReprPCWk	0.375363	0.0627204	2.16796e-09
CTTTATA	43	E116	14_ReprPCWk	0.349848	0.0571471	9.24712e-10
AGACGTG	-45	E116	9_Het	0.526331	0.0618212	1.68372e-17
CCATGTA	-52	E116	9_Het	0.39182	0.0442639	8.60336e-19
CCCACCC	-240	E116	9_Het	0.346975	0.0442594	4.52077e-15
GGAGTTT	-90	E116	9_Het	0.373128	0.0524079	1.08171e-12
ACTGAAT	-167	E116	5_TxWk	0.667701	0.0921912	4.40253e-13
CCGCCAT	-17	E116	5_TxWk	0.618039	0.0989149	4.15235e-10
ACTGAAT	-167	E116	4_Tx	1.26362	0.158701	1.68976e-15
TCTCACG	-114	E117	15_Quies	-0.403965	0.0469247	7.38333e-18
TCTCGTG	-133	E117	15_Quies	-0.379702	0.048571	5.38995e-15
CCACGTG	9	E117	15_Quies	-0.309437	0.0395555	5.16373e-15
AGCGTGA	82	E117	15_Quies	-0.411212	0.0599548	6.94868e-12
TAAGACG	-47	E117	15_Quies	-0.345825	0.0535853	1.09138e-10
CTGCCGC	-58	E117	15_Quies	-0.385166	0.0631907	1.09239e-09
TAACTGA	-169	E117	15_Quies	-0.298961	0.0518096	7.90917e-09
CGCCTTC	-23	E117	15_Quies	-0.456546	0.0817615	2.35217e-08
GAGTCCA	23	E117	14_ReprPCWk	0.339485	0.0449728	4.39689e-14
CCACGTG	9	E117	14_ReprPCWk	0.326146	0.047486	6.49937e-12
TCTCGTG	-133	E117	14_ReprPCWk	0.356476	0.0579693	7.77788e-10
CAGCGTG	81	E117	14_ReprPCWk	0.40007	0.0714227	2.12573e-08
TTTAAAA	-100	E117	14_ReprPCWk	-0.349317	0.0582762	2.04525e-09
ACTGAAT	-167	E117	5_TxWk	0.666267	0.0721124	2.48141e-20
CTCATGA	-113	E117	5_TxWk	-0.386647	0.0618871	4.16786e-10
CCGCCAT	-17	E117	5_TxWk	0.464147	0.0805916	8.44918e-09
CTGAATC	-166	E117	4_Tx	1.12448	0.195849	9.3811e-09
AACCCCT	33	E118	15_Quies	-0.349566	0.05824	1.94719e-09
TAAGACG	-47	E118	15_Quies	-0.288134	0.0467403	7.06706e-10
ACCCCTT	-80	E118	14_ReprPCWk	0.439285	0.0696629	2.86587e-10
TCACGAG	-112	E118	14_ReprPCWk	0.407365	0.0529915	1.50191e-14
CTCGGGT	61	E118	14_ReprPCWk	0.399019	0.0619158	1.15949e-10
TTTAAAA	-100	E118	14_ReprPCWk	-0.338253	0.0533427	2.28088e-10
TACGTCT	67	E118	14_ReprPCWk	0.648856	0.103482	3.60448e-10
AGCTCCC	-214	E118	14_ReprPCWk	0.232929	0.0407774	1.1151e-08
TCCATGT	-51	E118	9_Het	0.453326	0.0436703	3.03678e-25
TCACGAG	-112	E118	9_Het	-0.452922	0.0618701	2.46996e-13
CCACGTG	9	E118	9_Het	-0.297971	0.0454607	5.58411e-11
TTCTCGT	-134	E118	9_Het	-0.401839	0.0620623	9.49549e-11
CTCGGGT	61	E118	9_Het	-0.43646	0.0722324	1.51801e-09
GGGGCGG	-156	E118	9_Het	-0.514239	0.0882455	5.6309e-09
CAGCGTG	81	E118	9_Het	-0.443654	0.0788523	1.84014e-08
CCGCCAT	-17	E118	5_TxWk	0.618815	0.0709049	2.606e-18
ACTGAAT	-167	E118	5_TxWk	0.525607	0.0678093	9.09859e-15
CCTTTCG	-28	E118	5_TxWk	0.751929	0.124367	1.48431e-09
CACGAGA	-111	E118	5_TxWk	0.418729	0.0738755	1.44439e-08
CTGAATC	-166	E118	4_Tx	1.07183	0.142178	4.74823e-14
TCTCGTG	-133	E118	13_ReprPC	0.805097	0.137709	5.02413e-09
CACGAGA	-111	E119	15_Quies	-0.311669	0.047063	3.53477e-11
GTAACTG	-170	E119	15_Quies	-0.401144	0.0572569	2.45156e-12
CCGCCAT	-17	E119	15_Quies	-0.275802	0.0478087	7.98071e-09
TGAATAC	-122	E119	9_Het	0.678249	0.113883	2.59046e-09
ACTGAAT	-167	E119	5_TxWk	0.55264	0.0677662	3.48897e-16
CCGCCAT	-17	E119	5_TxWk	0.519801	0.0731088	1.16068e-12
CGGGTAT	63	E119	5_TxWk	0.476548	0.0838374	1.31434e-08
CTGAATC	-166	E119	4_Tx	1.25567	0.182129	5.40929e-12
TCACGAG	-112	E120	15_Quies	-0.308917	0.0480388	1.27119e-10
CTGAATC	-166	E120	15_Quies	-0.325039	0.0478804	1.1327e-11
CCTTCCG	-21	E120	15_Quies	-0.44491	0.0666136	2.40644e-11
AGCAGCG	79	E120	15_Quies	-0.377336	0.0596239	2.47372e-10
ACGTGCC	-33	E120	15_Quies	-0.437493	0.0713226	8.56959e-10
CGGGTAT	63	E120	15_Quies	-0.327243	0.0559607	4.98325e-09
CCCACGT	-200	E120	15_Quies	-0.273105	0.0481701	1.43142e-08
TTCTCGT	-134	E120	15_Quies	-0.274926	0.0489933	2.00573e-08
ACTGAAT	-167	E120	5_TxWk	0.508485	0.0641078	2.1612e-15
TCACGAG	-112	E120	5_TxWk	0.43782	0.0684427	1.58584e-10
CCCACGT	-200	E120	5_TxWk	0.417815	0.0685902	1.11879e-09
CCTTCCG	-21	E120	5_TxWk	0.560445	0.0919842	1.10926e-09
CTGAATC	-166	E120	4_Tx	1.09828	0.119979	5.48896e-20
CTCACGA	-113	E121	15_Quies	-0.315499	0.0435052	4.10731e-13
GCAGCGT	80	E121	15_Quies	-0.391961	0.0546598	7.4498e-13
TCCCGTG	-144	E121	15_Quies	-0.469722	0.0688507	8.95737e-12
CGCCATG	-16	E121	15_Quies	-0.295391	0.0464277	1.98664e-10
ACGTGCC	-33	E121	15_Quies	-0.379947	0.0663982	1.05122e-08
TACGTCT	67	E121	14_ReprPCWk	0.569565	0.0973103	4.82558e-09
ACTGAAT	-167	E121	5_TxWk	0.580548	0.061489	3.67518e-21
CCGCCAT	-17	E121	5_TxWk	0.413957	0.068085	1.20188e-09
CGGGTAT	63	E121	5_TxWk	0.463012	0.0764821	1.41416e-09
AGCAGCG	79	E121	5_TxWk	0.48694	0.0812663	2.07386e-09
CGCCTTC	-23	E121	5_TxWk	0.601889	0.105913	1.32473e-08
TCACGAG	-112	E121	5_TxWk	0.379107	0.0675674	2.01391e-08
GGTAACT	-171	E121	4_Tx	1.1326	0.189393	2.22874e-09
AACTGAA	-168	E122	5_TxWk	0.696403	0.0763897	7.76202e-20
TCTCATG	-133	E122	5_TxWk	-0.350054	0.0597242	4.59587e-09
ACTGAAT	-167	E122	4_Tx	1.0887	0.170681	1.78715e-10
CCGCCAT	-17	E123	15_Quies	-0.475848	0.0509991	1.0537e-20
CTCACGA	-113	E123	15_Quies	-0.385638	0.0505318	2.31873e-14
TCTCGTG	-133	E123	15_Quies	-0.370545	0.0508402	3.13618e-13
GCAGCGT	80	E123	15_Quies	-0.481083	0.0622274	1.06667e-14
ACGTGCC	-33	E123	15_Quies	-0.514942	0.0744162	4.52397e-12
TCGGGTA	62	E123	15_Quies	-0.416677	0.0582867	8.7575e-13
ACTGAAT	-167	E123	15_Quies	-0.353336	0.0483601	2.74464e-13
CCCACGT	-200	E123	15_Quies	-0.319068	0.0512427	4.76663e-10
CGGTTTC	-151	E123	15_Quies	-0.55796	0.0995438	2.08053e-08
GAGTCCA	23	E123	14_ReprPCWk	0.435866	0.051791	3.90011e-17
ACGTGCC	-33	E123	14_ReprPCWk	0.648928	0.0909424	9.63703e-13
CGCCATG	-16	E123	14_ReprPCWk	0.476572	0.06868	3.94847e-12
TCTCGTG	-133	E123	14_ReprPCWk	0.423573	0.0662096	1.57981e-10
CATCCAT	-53	E123	9_Het	0.783601	0.122066	1.36744e-10
ACTGAAT	-167	E123	5_TxWk	0.6546	0.0745899	1.6942e-18
TCGGGTA	62	E123	5_TxWk	0.520218	0.0923568	1.77407e-08
CTGAATC	-166	E123	4_Tx	1.1862	0.160533	1.47819e-13
CGGTTTC	-151	E123	7_Enh	1.45313	0.252336	8.47572e-09
CGCCATG	-16	E124	15_Quies	-0.292015	0.0485048	1.74058e-09
TTTATAA	-95	E124	9_Het	-0.3644	0.044758	3.90227e-16
ACTGAAT	-167	E124	4_Tx	0.89288	0.0932115	9.79138e-22
CCGCCAT	-17	E124	4_Tx	0.721734	0.102511	1.91481e-12
TCACGAG	-112	E125	15_Quies	-0.445771	0.0504147	9.39452e-19
CGCCATG	-16	E125	15_Quies	-0.336077	0.0543142	6.10687e-10
GCAGCGT	80	E125	15_Quies	-0.381382	0.0634385	1.83431e-09
ACGTGCC	-33	E125	15_Quies	-0.444459	0.075805	4.54056e-09
ACTGAAT	-167	E125	15_Quies	-0.296201	0.048952	1.44083e-09
AATAAGT	-120	E125	15_Quies	0.236303	0.036895	1.50623e-10
TACGTCT	67	E125	14_ReprPCWk	0.834481	0.121114	5.57834e-12
CACGAGA	-111	E125	14_ReprPCWk	0.417625	0.0695479	1.91513e-09
ACTGAAT	-167	E125	5_TxWk	0.597178	0.0691528	5.84018e-18
ACGAGAT	-110	E125	5_TxWk	0.433539	0.0776029	2.31513e-08
TTCTCGT	-134	E126	15_Quies	-0.321998	0.0474008	1.09759e-11
ACGTGCC	-33	E126	15_Quies	-0.428937	0.0697561	7.79238e-10
GCAGCGT	80	E126	15_Quies	-0.348274	0.0582512	2.2473e-09
CCGCCAT	-17	E126	15_Quies	-0.285819	0.0478651	2.35314e-09
CGGGTAT	63	E126	15_Quies	-0.322997	0.0546012	3.3074e-09
ACTGAAT	-167	E126	5_TxWk	0.54385	0.0626872	4.11328e-18
CCGCCAT	-17	E126	5_TxWk	0.420347	0.069131	1.19853e-09
CACGAGA	-111	E126	5_TxWk	0.411279	0.0686419	2.07707e-09
CTGAATC	-166	E126	4_Tx	1.08292	0.182668	3.06018e-09
TCACGAG	-112	E127	15_Quies	-0.377309	0.0455532	1.20285e-16
CCGCCAT	-17	E127	15_Quies	-0.332064	0.0466598	1.10547e-12
GCAGCGT	80	E127	15_Quies	-0.352963	0.057252	7.04519e-10
GTAACTG	-170	E127	15_Quies	-0.346477	0.0568509	1.09789e-09
TTCTCGT	-134	E127	15_Quies	-0.268521	0.0468129	9.69162e-09
TACGTCT	67	E127	14_ReprPCWk	0.88029	0.114293	1.33917e-14
CACGAGA	-111	E127	14_ReprPCWk	0.395104	0.0651182	1.29923e-09
TGAGTCC	22	E127	14_ReprPCWk	0.311255	0.0500644	5.06454e-10
AGGTAAC	-172	E127	5_TxWk	0.684105	0.0891259	1.6449e-14
CCGCCAT	-17	E127	5_TxWk	0.499458	0.0734582	1.05193e-11
CGGGTAT	63	E127	5_TxWk	0.523777	0.0827727	2.48521e-10
GCGTGAA	83	E127	5_TxWk	0.598806	0.102746	5.6092e-09
CTGAATC	-166	E127	4_Tx	1.09979	0.165523	3.0451e-11
ACGAGAT	-110	E128	15_Quies	-0.398215	0.0499557	1.56933e-15
TTCTCGT	-134	E128	15_Quies	-0.367881	0.0496035	1.20316e-13
ACGTGCC	-33	E128	15_Quies	-0.54315	0.0717973	3.87705e-14
CCGCCAT	-17	E128	15_Quies	-0.34585	0.0500865	5.01825e-12
AGCAGCG	79	E128	15_Quies	-0.40866	0.06067	1.63047e-11
GTCTCGG	59	E128	15_Quies	-0.320544	0.0559356	1.00082e-08
TACGTCT	67	E128	14_ReprPCWk	0.765149	0.113509	1.57442e-11
TTCTCGT	-134	E128	14_ReprPCWk	0.377089	0.0630822	2.26262e-09
ACGTGCC	-33	E128	14_ReprPCWk	0.502539	0.0893077	1.8332e-08
CCGCCAT	-17	E128	5_TxWk	0.533001	0.0721997	1.55566e-13
ACTGAAT	-167	E128	5_TxWk	0.492708	0.0682183	5.10361e-13
ACGAGAT	-110	E128	5_TxWk	0.467767	0.0738885	2.44038e-10
TCCCACG	-201	E128	5_TxWk	0.445821	0.077432	8.53298e-09
TCACGAG	-112	E129	15_Quies	-0.369362	0.0460768	1.09032e-15
CCTTCCG	-21	E129	15_Quies	-0.429496	0.0647753	3.34435e-11
GCAGCGT	80	E129	15_Quies	-0.378306	0.0576742	5.40388e-11
ACGTGCC	-33	E129	15_Quies	-0.442494	0.0692082	1.61966e-10
CGGGTAT	63	E129	15_Quies	-0.340073	0.0540514	3.14081e-10
TAACTGA	-169	E129	15_Quies	-0.301912	0.0490008	7.21165e-10
GTTCTCG	-135	E129	15_Quies	-0.289557	0.0500348	7.16101e-09
CACGAGA	-111	E129	14_ReprPCWk	0.371775	0.0577755	1.23615e-10
TACGTCT	67	E129	14_ReprPCWk	0.689741	0.107824	1.58575e-10
ACTGAAT	-167	E129	5_TxWk	0.536459	0.0647413	1.16926e-16
CCGCCAT	-17	E129	5_TxWk	0.466044	0.0706056	4.09307e-11
GTCTCGG	59	E129	5_TxWk	0.441374	0.0786966	2.04023e-08
ACTGAAT	-167	E129	4_Tx	0.796573	0.133836	2.65131e-09

## Sheet: ROADMAP summary
Central Motif	Position relative to PRDM9 binding motif in THE1Bc	Group associated with PRDM9 binding	Group associated with H3K4me3 without PRDM9 binding	Group associated with Pratto hotspots given binding	Group associated with LD hotspots given binding	Associated with heterochro-matin, in at least one ROADMAP cell type?	Total number among 125 ROADMAP cell types with positive associations (p<2.5x10-8)								Total number among 125 ROADMAP cell types with negative associations (p<2.5x10-8)								Motif group									Notes
							15_Quies	14_ReprPCWk	9_Het	5_TxWk	4_Tx	7_Enh	8_ZNF/Rpts	13_ReprPC	15_Quies	14_ReprPCWk	9_Het	5_TxWk	4_Tx	7_Enh	8_ZNF/Rpts	13_ReprPC				TAAYBBAATCA
ACTGAAT	-167	0	0	0	0	0	0	0	0	116	96	0	2	0	74	0	0	0	0	0	0	0	AGGTAAC	GGTAACT	GTAACTG	TAACTGA	AACTGAA	ACTGAAT	CTGAATC			Combined motif AGGTAACTGAATC exactly matches DUX4 binding target; DUX4 binding to motif TAA[CT][CGT][CGT]AATCA in THE1B elements was previously reported (Geng et al. Dev. Cell 2012)
CCGCCAT	-17	0	1	0	0	1	0	1	0	82	49	0	0	0	72	0	2	0	0	0	0	0	CTGCCGC	TGCCGCC	GCCGCCA	CCTTCCG	CTTCCGC	TTCCGCC	TCCGCCA	CCGCCAT	CGCCATG	Matches consensus target sequence for YY1
ATCCATG	-52	0	1	1	1	1	0	0	61	0	0	0	22	0	24	1	0	2	0	0	0	0	GCCATCC	CCATCCA	CATCCAT	ATCCATG	TCCATGT	TGACTTG				Most significant motif for non-PRDM9 hotspot influence, and non-PRDM9 H3K4me3 in testes
TCACGAG	-112	0	1	0	0	1	0	28	0	51	4	0	0	0	65	0	26	0	0	0	0	0	TCTCACG	CTCACGA	TCACGAG	CACGAGA	ACGAGAT	CGAGATC				Combined motif of TCTCACGAGA spans this region; closely matches ZBTB33 consensus recognition sequence TCTCGCGAGA, and ZBTB33 binding to THE1B was found previously (Wang et al. Genome Research 2012)
TACGTCT	67	0	0	0	0	0	0	34	0	9	0	0	0	0	1	0	0	0	0	0	0	0	TACGTCT
TTCCCTG	-75	0	1	1	1	1	0	0	32	0	0	0	1	0	15	2	0	0	0	0	0	0	GGAGTTT	AGTTTCC	TTTCCCT	TTCCCTG	TCCCTGC	GTTTCCC
CGGGTAT	63	0	0	0	0	1	0	1	0	30	0	0	0	0	24	0	6	0	0	0	0	0	AGTCTCG	GTCTCGG	TCTCGGG	CTCGGGT	TCGGGTA	CGGGTAT
ACGTGCC	-33	0	1	0	0	1	0	18	1	27	0	1	0	2	50	0	22	0	0	0	0	0	TAAGACG	AAGACGT	AGACGTG	GACGTGC	ACGTGCC	CGTGCCT				Heavily overlaps motif AGATGTG in terms of position, and plausibly may act by preventing H3K9me3 deposition
AGATGTG	-43	0	1	0	1	1	0	0	20	0	0	0	0	0	6	0	0	0	0	0	0	0	AGATGTG	GATGTGC	ATGTGCC							Nearby most significant motif "ATCCATG" for non-PRDM9 hotspot influence, and non-PRDM9 H3K4me3 in testes
GAGTCCA	23	0	0	0	0	1	1	18	0	0	0	0	0	0	0	0	1	0	0	0	0	0	AACTGTG	TGTGAGT	TGAGTCC	GAGTCCA
AGCGTGA	82	0	1	0	0	1	0	2	0	16	10	0	0	0	29	0	7	0	0	0	0	0	AGCAGCG	GCAGCGT	CAGCGTG	AGCGTGA	GCGTGAA
CCACGTG	9	1	0	1	0	1	0	5	0	12	0	0	0	0	10	0	20	0	0	0	0	0	TCCCACG	CCCACGT	CACGTGT	CCACGTG						Impacts PRDM9 binding directly, and within motif region
TGTAAGA	-49	0	1	0	0	1	0	0	12	0	0	0	0	0	4	0	0	1	0	0	0	0	CCATGTA	CATGTAA	TGTAAGA							Not directly identified for H3K4me3 influence or hotspot usage, but precisely between motifs which are.
TTCTCGT	-134	0	0	0	0	1	0	7	0	1	0	0	0	2	16	0	11	0	0	0	0	0	GTTCTCG	TTCTCGT	TCTCGTG	CTCGTGA
AGACATG	-45	0	0	0	0	1	0	0	6	0	0	0	0	0	2	0	0	0	0	0	0	0	AAGACAT	AGACATG	CATGCCT
GATCTCA	-106	0	0	0	0	0	0	0	0	5	0	0	0	0	0	0	0	0	0	0	0	0	AGATCTC	GATCTCA
TTGCTCC	-35	0	0	0	0	1	0	0	5	0	0	0	0	0	4	0	0	0	0	0	0	0	TTGCTCC	TGCTCCT	CTCCTCC
CGCCTTC	-23	0	0	0	0	0	0	0	0	5	0	0	0	0	2	0	0	0	0	0	0	0	CGCCTTC
TTGTAGC	-218	0	1	0	0	1	0	4	0	0	0	0	0	0	0	0	3	0	0	0	0	0	TTGTAGC	TGTAGCT	AGCTCCC	GCTCCCA	ATTGTAG
TTTATAA	-95	0	1	0	0	1	21	4	0	0	0	0	0	0	0	0	35	0	0	0	0	0	TTTATAA	TTATAAA	CTTTATA	TATAAAT	TAAATTA	AATTACC	ATTACCC	TACCCAG
CCCCTTT	-79	0	0	0	0	0	0	4	0	0	0	0	0	0	1	0	0	0	0	0	0	0	ACCCCTT	CCCCTTT	AACCCCT
AAAACGG	88	0	0	0	0	1	0	0	0	4	0	0	0	0	13	0	1	0	0	0	0	0	GAAAACG	AAAACGG	AAACGGA	AACGGAC	CGGACTA
GGGAGGG	-189	0	0	0	0	0	0	3	0	0	0	0	0	0	2	0	0	0	0	0	0	0	GGGAGGG	GAGGGAC
CGGTTTC	-151	0	0	0	0	0	0	3	0	0	0	1	0	0	1	0	0	0	0	0	0	0	GGCGGTT	CGGTTTC
TTCCCCC	-147	0	1?	1?	1?	1	1	3	0	0	0	0	0	0	0	0	7	0	0	0	0	0	TTCCCCC	CCCCCAT	CCCCATA	ATACTGT	TACTGTT	TTTCCCC?
CTGTAAG	19	0	0	0	0	1	0	0	3	0	0	0	0	0	0	0	0	0	0	0	0	0	CTGTAAG	TGTAAGT
TTTTGTA	43	0	0	0	0	1	0	0	3	0	0	0	0	0	0	3	0	0	0	0	0	0	CTTTTGT	TTTTGTA	TAAATTG	AATTGCC
CCCACCC	-240	0	1?	1	0	1	0	0	2	0	0	0	0	0	4	0	0	0	0	0	0	0	GTCCCCA	TCCCCAC	CCCACCC	TGTCCCC?
TTTCCCA	-146	0	0	0	0	1	0	0	2	0	0	0	0	0	0	0	0	0	0	0	0	0	TTTCCCA
CCTTTCG	-28	0	0	0	0	0	0	0	0	2	0	0	0	0	0	0	0	0	0	0	0	0	CCTTTCG
TCTTGAG	60	0	0	0	0	0	0	2	0	1	0	0	0	0	0	0	0	0	0	0	0	0	TCTTGAG
TGAAAAT	86	0	0	0	0	1	0	0	2	0	0	0	0	0	0	0	0	0	0	0	0	0	TGAAAAT
CCAAATC	-235	0	0	0	0	0	0	1	0	0	0	0	0	0	0	0	0	0	0	0	0	0	CCAAATC
CAGGTCT	-157	0	0	0	0	0	0	0	0	0	0	0	1	0	0	0	0	0	0	0	0	0	CAGGTCT
GGTTTCC	-150	0	0	0	0	0	0	1	0	0	0	0	0	0	0	0	0	0	0	0	0	0	GGTTTCC
TGAATAC	-122	0	1	0	0	1	0	0	1	0	0	0	0	0	0	0	0	0	0	0	0	0	TGAATAC
CTTCTCT	-58	0	0	0	0	1	0	0	1	0	0	0	0	0	0	0	0	0	0	0	0	0	CTTCTCT
GCCTTTG	-39	0	0	0	0	1	0	0	1	0	0	0	0	0	0	0	0	0	0	0	0	0	GCCTTTG
TGTTCCT	-34	0	0	0	0	0	0	0	0	0	1	0	1	0	0	0	0	0	0	0	0	0	TGTTCCT
ATGACTG	-12	0	0	0	0	0	0	0	0	0	1	0	0	0	0	0	0	0	0	0	0	0	ATGACTG
TAAATTT	48	0	0	0	0	1	0	0	1	0	0	0	0	0	0	0	0	0	0	0	0	0	TAAATTT
GGTTTGG	-254	0	0	0	0	0	0	0	0	0	0	0	0	0	1	0	0	0	0	0	0	0	GGTTTGG
TGAATTG	-222	0	0	0	0	1	0	0	0	0	0	0	0	0	0	0	3	0	0	0	0	0	TGAATTG	GAATTGT
CACATGT	-199	0	0	0	0	0	1	0	0	0	0	0	0	0	0	0	0	0	0	0	0	0	CACATGT
ACATGTC	-198	0	0	0	0	0	3	0	0	0	0	0	0	0	0	0	0	0	0	0	0	0	ACATGTC
TGTCGTG	-195	0	0	0	0	0	0	0	0	0	0	0	0	0	1	0	0	0	0	0	0	0	TGTCGTG
ACCCGGT	-182	0	0	0	0	1	0	0	0	0	0	0	0	0	0	0	1	0	0	0	0	0	ACCCGGT
GATAATT	-170	0	0	0	0	0	2	0	0	0	0	0	0	0	0	0	0	0	0	0	0	0	GATAATT
ATTGAAT	-167	0	0	0	0	1	20	0	0	0	0	0	0	0	0	0	1	8	2	0	0	0	TAATTGA	ATTGAAT
GGGGCGG	-156	0	1	0	0	1	0	0	0	0	0	0	0	0	0	0	1	0	0	0	0	0	GGGGCGG
CCCGTGC	-143	0	0	0	0	1	0	0	0	0	0	0	0	0	1	0	3	0	0	0	0	0	TTCCCGT	TCCCGTG	CCCGTGC
TCTCATG	-133	0	0	0	0	0	5	0	0	0	0	0	0	0	0	0	0	7	5	0	0	0	TCTCATG	CTCATGA
ATGATAG	-129	0	0	0	0	0	0	0	0	0	0	0	0	0	0	0	0	2	0	0	0	0	ATGATAG	TGATAGT
AATAAGT	-120	0	0	0	0	0	13	0	0	0	0	0	0	0	0	0	0	9	7	0	0	0	AGTGAAT	TGAATAA	AATAAGT	ATAAGTC
AGTAAAT	-124	0	0	0	0	0	3	0	0	0	0	0	0	0	0	0	0	0	0	0	0	0	AGTAAAT	TAAATAA	AAATAAG
TTTAAAA	-100	0	0	0	0	0	0	0	0	0	0	0	0	0	0	6	0	0	0	0	0	0	TTTTAAA	TTTAAAA
AAAAATG	-97	0	0	0	0	0	6	0	0	0	0	0	0	0	0	1	0	1	0	0	0	0	TAAAAAT	AAAAATG
TGACTTT	-40	0	0	0	0	0	1	0	0	0	0	0	0	0	0	0	0	0	0	0	0	0	TGACTTT
CATGACT	-13	0	0	0	0	0	0	0	0	0	0	0	0	0	1	0	0	0	0	0	0	0	CATGACT
GCCTCCC	-1	0	0	0	0	1	0	0	0	0	0	0	0	0	1	0	1	0	0	0	0	0	GCCTCCC
GTCAATT	25	0	0	0	0	0	7	0	0	0	0	0	0	0	0	0	0	0	0	0	0	0	GTCAATT	TCAATTA	AATTAAA
TATTAAA	28	0	0	0	0	0	1	0	0	0	0	0	0	0	0	0	0	0	0	0	0	0	TATTAAA
ACCTCTT	34	0	0	0	0	1	0	0	0	0	0	0	0	0	0	0	1	0	0	0	0	0	ACCTCTT
TTTCCTT	39	0	0	0	0	0	2	0	0	0	0	0	0	0	0	0	0	0	0	0	0	0	TTTCCTT	TTCCTTT
AATTTCC	50	0	0	0	0	0	2	0	0	0	0	0	0	0	0	0	0	0	0	0	0	0	AATTTCC
TTATCAG	74	0	0	0	0	0	0	0	0	0	0	0	0	0	1	0	0	0	0	0	0	0	TTATCAG
AAAATGA	88	0	0	0	0	0	1	0	0	0	0	0	0	0	0	0	0	0	0	0	0	0	AAAATGA
