# Supplementary material for: A map of human PRDM9 binding provides evidence for novel behaviors of PRDM9 and other zinc-finger proteins in meiosis
Source: eLife journal article supplement (doi:10.7554/elife.28383), 2017-10-26

**a****Testis DMC1 at Non-telomeric THE1Bs**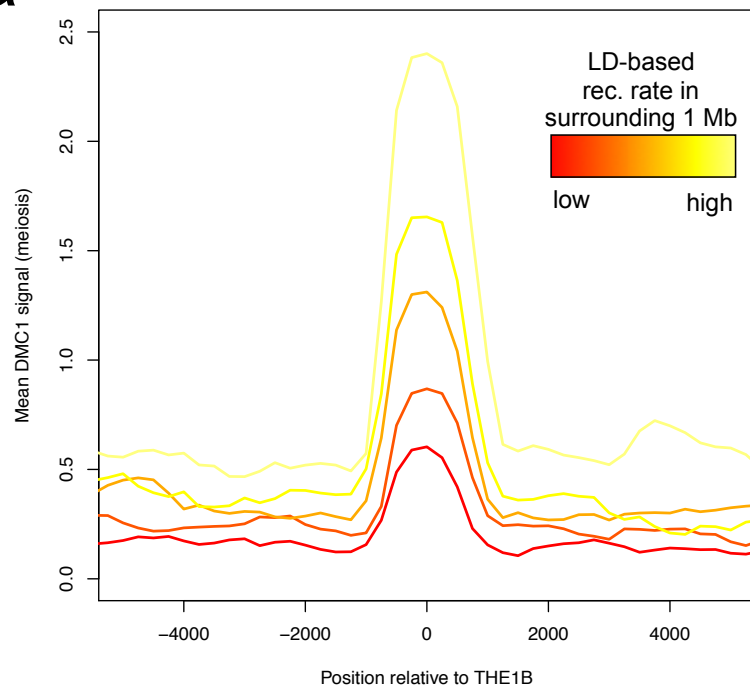**b****Testis DMC1 at Telomeric THE1Bs**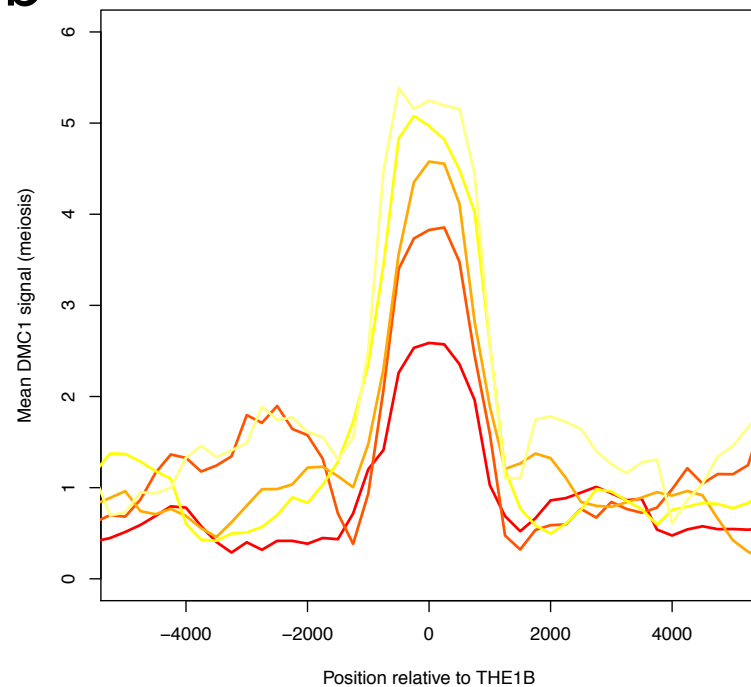**c****Testis H3K4me3 at Non-telomeric THE1Bs**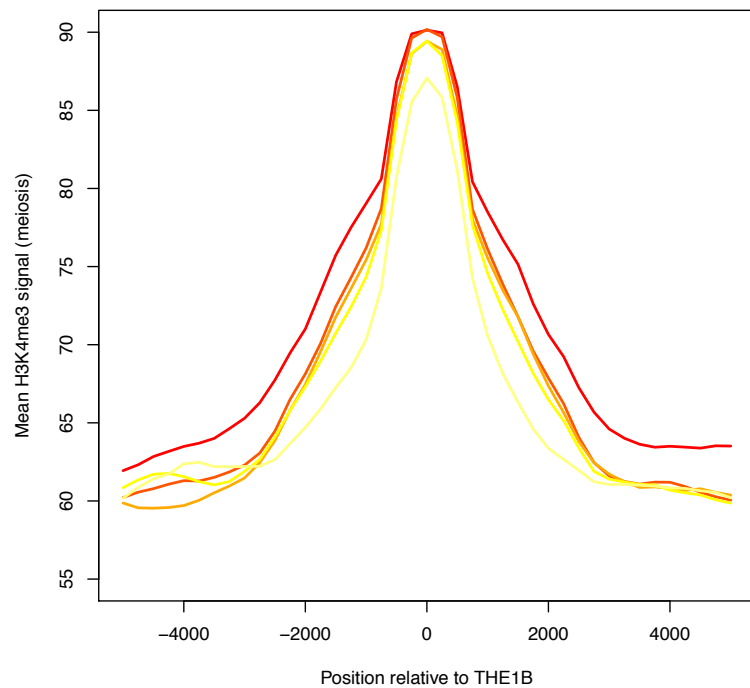**d****Testis H3K4me3 at Telomeric THE1Bs**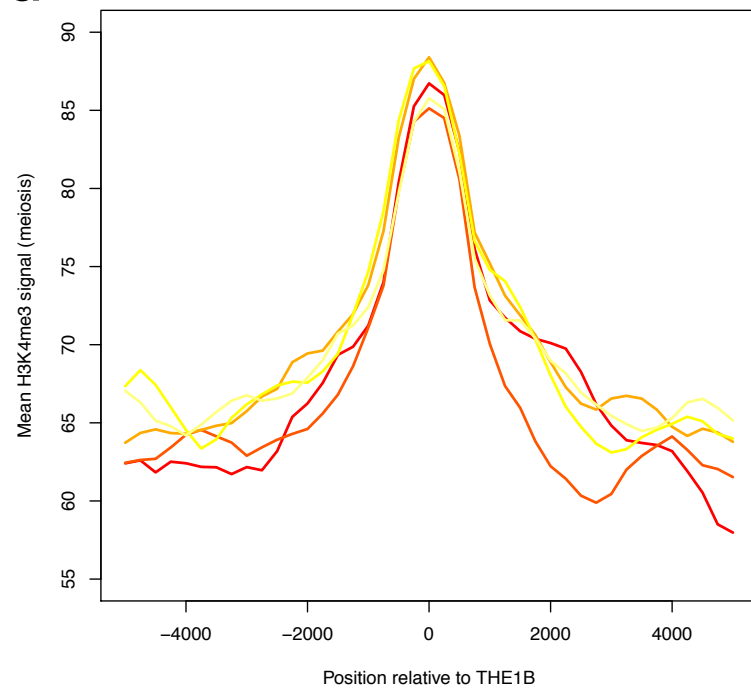

Supplement: supp [file elife-28383-supp-v1.zip]
