# Supplementary material for: A map of human PRDM9 binding provides evidence for novel behaviors of PRDM9 and other zinc-finger proteins in meiosis
Source: eLife journal article supplement (doi:10.7554/elife.28383), 2017-10-26

**a****HEK293T H3K4me3**

HEK293T H3K4me3 enrich.

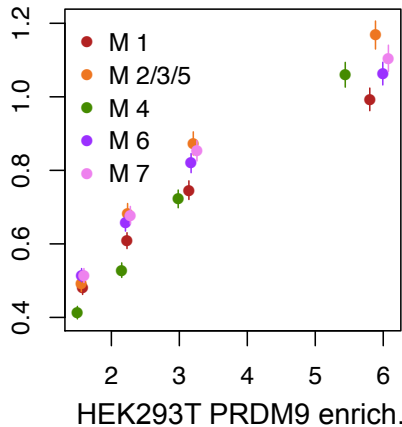**b****Testis (A/B) H3K4me3**

testis H3K4me3 enrich.

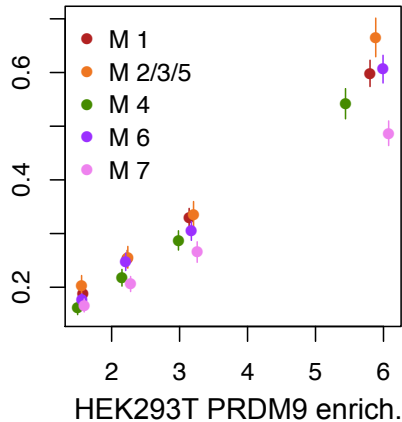**c****Testis (A/A vs A/B) DMC1**

A/A testis DMC1 heat

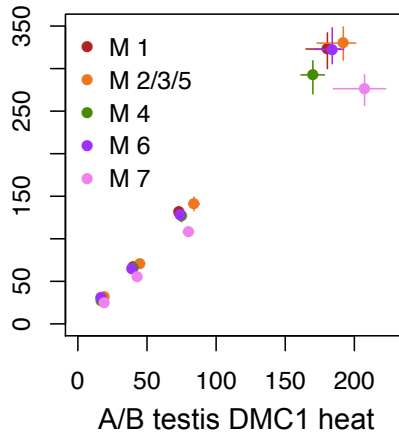

Supplement: supp [file elife-28383-supp-v1.zip]
