# Supplementary material for: A map of human PRDM9 binding provides evidence for novel behaviors of PRDM9 and other zinc-finger proteins in meiosis
Source: eLife journal article supplement (doi:10.7554/elife.28383), 2017-10-26

# Immunodetection of V5-tagged human PRDM9 in transfected HEK293T cells

V5-Human PRDM9

V5-ZFonly PRDM9

V5-NoZF PRDM9

DAPI

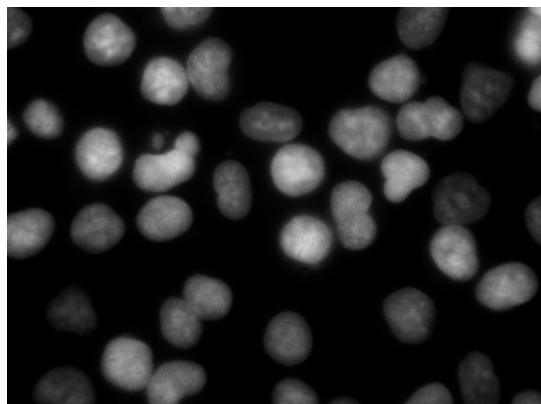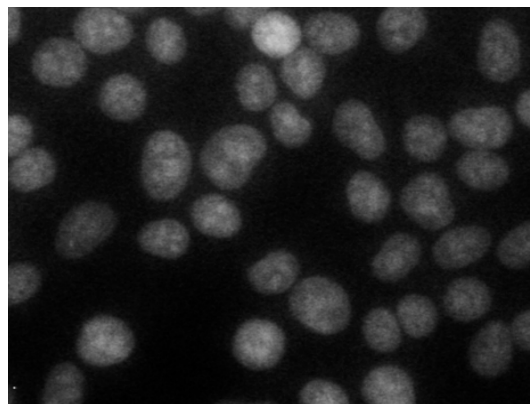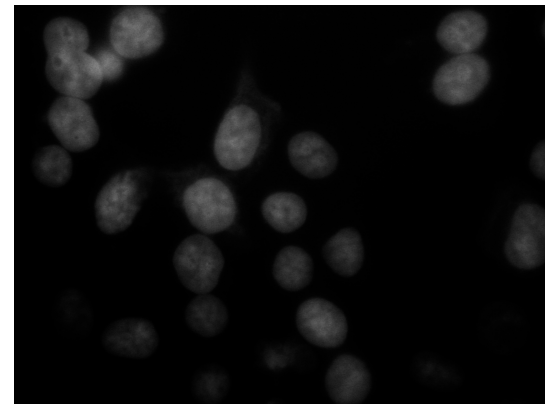

Anti-V5

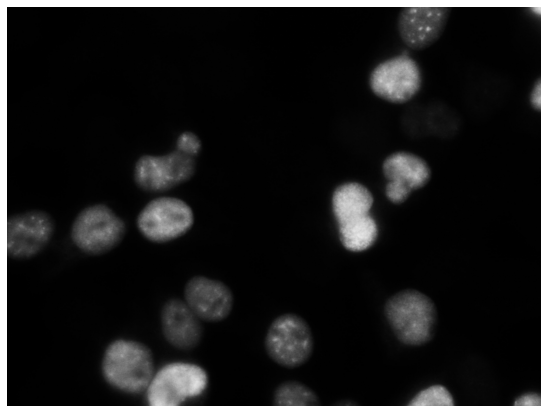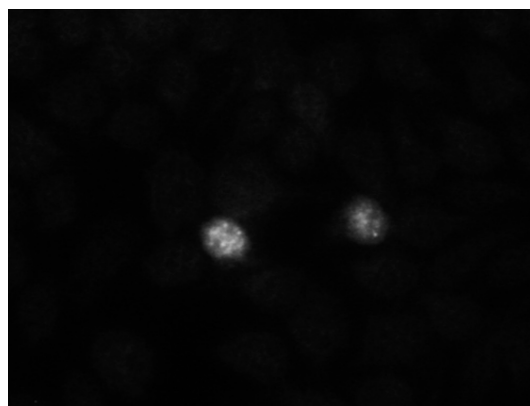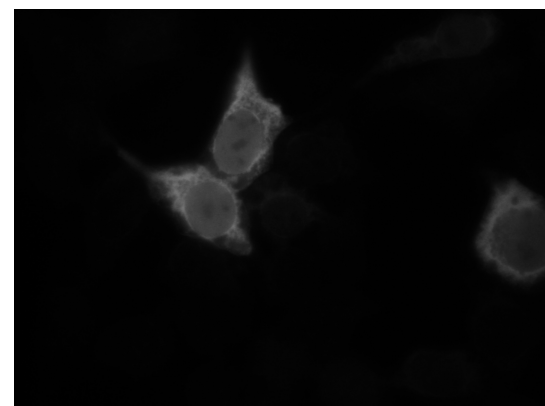

Merge

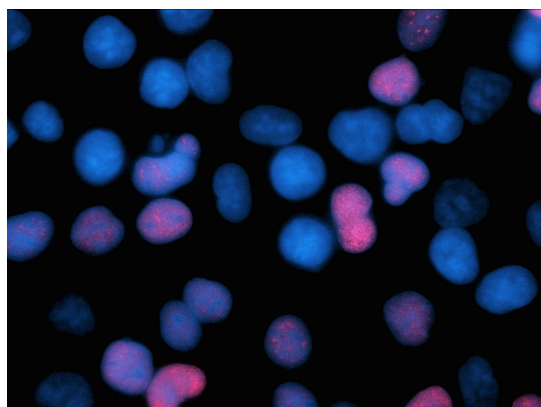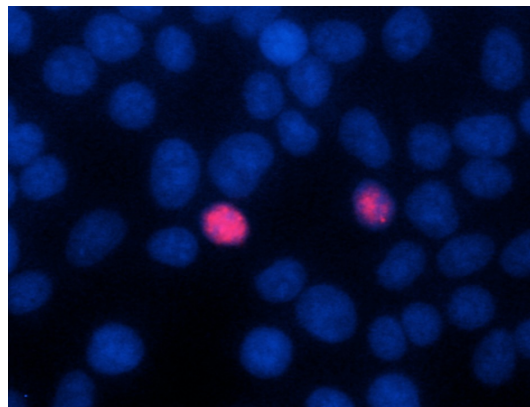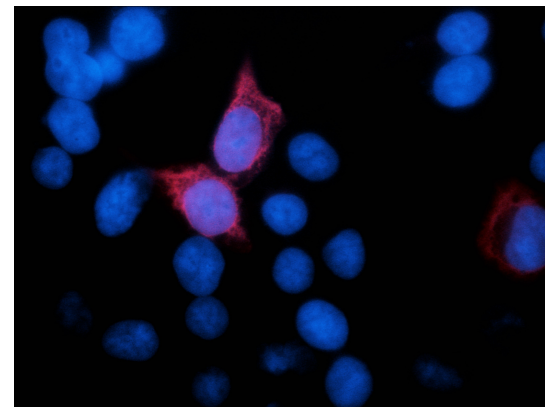

Supplement: supp [file elife-28383-supp-v1.zip]
