# Supplementary material for: A map of human PRDM9 binding provides evidence for novel behaviors of PRDM9 and other zinc-finger proteins in meiosis
Source: eLife journal article supplement (doi:10.7554/elife.28383), 2017-10-26
Supplement: supp [file elife-28383-supp-v1.zip]

# VCX locus

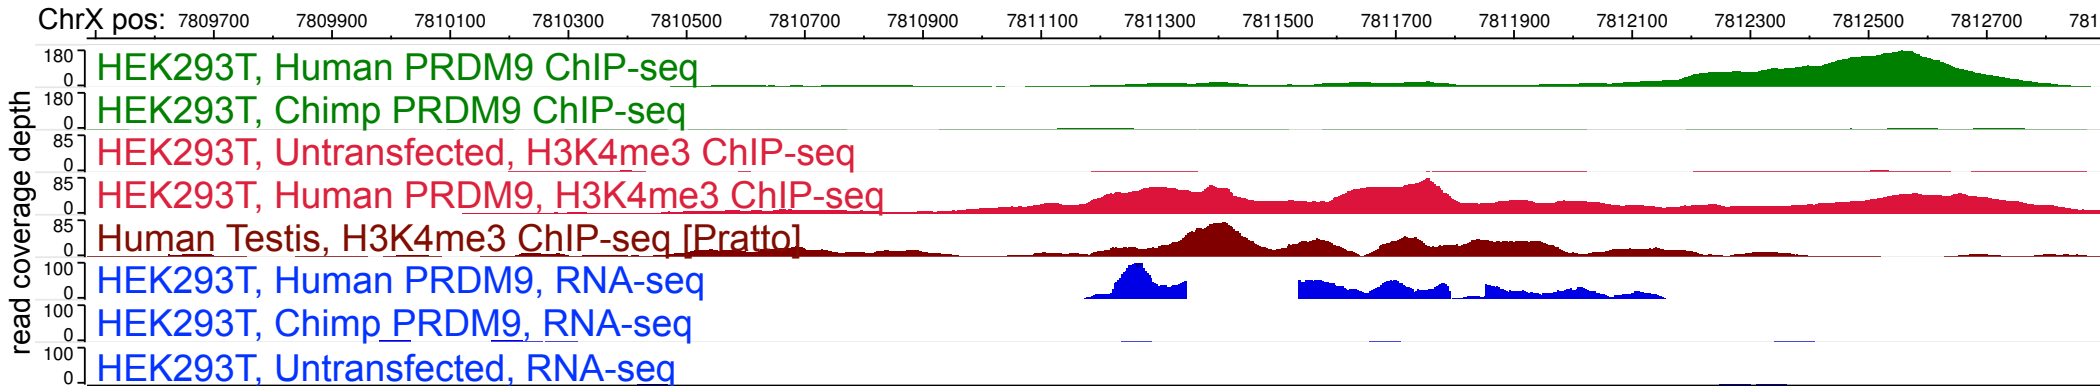

RepeatMasker/RefSeq genes

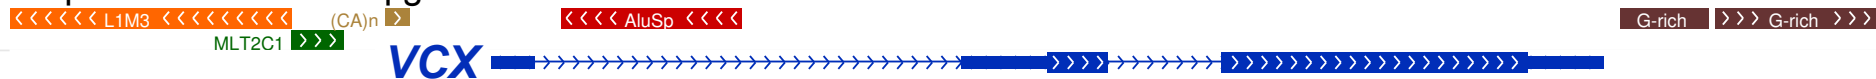

PRDM9-motif-rich repeat (Myers 2008);  
site of NAHR causing X-linked ichthyosis  
(Van Esch 2005)
