# Supplementary material for: A map of human PRDM9 binding provides evidence for novel behaviors of PRDM9 and other zinc-finger proteins in meiosis
Source: eLife journal article supplement (doi:10.7554/elife.28383), 2017-10-26
Supplement: supp [file elife-28383-supp-v1.zip]

| Benzonase  | - | - | + | + |   |   |   |
|------------|---|---|---|---|---|---|---|
| IP anti-V5 | - | + | - | + |   |   |   |
| Lane       | 1 | 2 | 3 | 4 | 5 | 6 | 7 |
| kDa        |   |   |   |   |   |   |   |
| 225        |   |   |   |   |   |   |   |
| heavy      |   |   |   |   |   |   |   |
| 150        |   |   |   |   |   |   |   |
| 102        |   |   |   |   |   |   |   |
| Da)        |   |   |   |   |   |   |   |
| 76         |   |   |   |   |   |   |   |
| 52         |   |   |   |   |   |   |   |
| y-HA       |   |   |   |   |   |   |   |
| 38         |   |   |   |   |   |   |   |
| (kDa)      |   |   |   |   |   |   |   |
| 31         |   |   |   |   |   |   |   |
| 17         |   |   |   |   |   |   |   |
| 12         |   |   |   |   |   |   |   |
| WB:        |   |   |   |   |   |   |   |
| anti-HA    |   |   |   |   |   |   |   |
| kDa        |   |   |   |   |   |   |   |
| 225        |   |   |   |   |   |   |   |
| 150        |   |   |   |   |   |   |   |
| 102        |   |   |   |   |   |   |   |
| 52         |   |   |   |   |   |   |   |
| y-V5       |   |   |   |   |   |   |   |
| 38         |   |   |   |   |   |   |   |
| (kDa)      |   |   |   |   |   |   |   |
| 12         |   |   |   |   |   |   |   |
| WB:        |   |   |   |   |   |   |   |
| anti-V5    |   |   |   |   |   |   |   |

| Transfection (h-V5 + h-HA + c-HA) | - | + | + | - | + | + |
|-----------------------------------|---|---|---|---|---|---|
| Benzonase                         | - | - | + | - | - | + |
| IP anti-V5                        | - | - | - | + | + | + |
| Lane                              | 1 | 2 | 3 | 4 | 5 | 6 |

cPRDM9-HA (128 kDa) →  
 hPRDM9-HA (110 kDa) →

Strip and re-probe blot →

WB: anti-HA  
 hPRDM9-V5 (110 kDa) →  
 WB: anti-V5

kDa  
 225  
 150  
 102

| input       |          |             | co-IP   |          |
|-------------|----------|-------------|---------|----------|
| -Benzo.     | + Benzo. | chimp       | -Benzo. | + Benzo. |
| 3.2         | 1.0      | intensities | 6.9     | 4.7      |
|             |          |             |         |          |
| 7.7         | 2.7      | human       | 27.9    | 26.3     |
| intensities |          |             |         |          |

**d**

log<sub>2</sub> Human/Chimp  
prey co-IP, normalized

| Benzodiazepine | log <sub>2</sub> Human/Chimp prey co-IP, normalized |
|----------------|-----------------------------------------------------|
| -              | ~0.75                                               |
| +              | ~0.95                                               |
