# Supplementary material for: A map of human PRDM9 binding provides evidence for novel behaviors of PRDM9 and other zinc-finger proteins in meiosis
Source: eLife journal article supplement (doi:10.7554/elife.28383), 2017-10-26

**a****Binding probability  
given Motif1 score**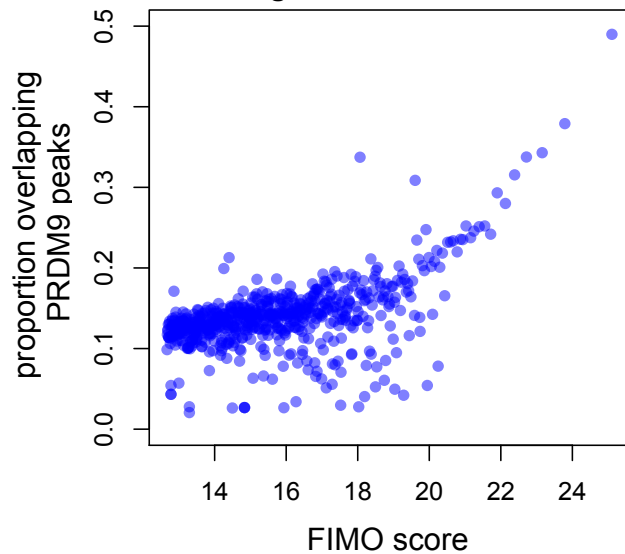**b****Input coverage  
given Motif1 score**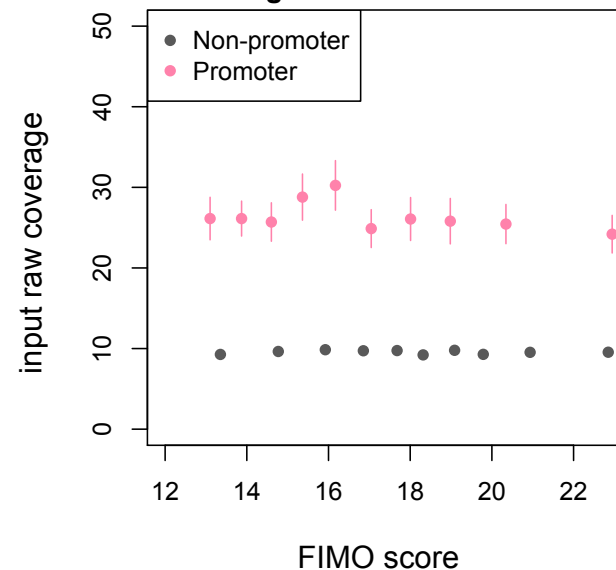**c****PRDM9 ChIP-seq coverage  
given Motif1 score**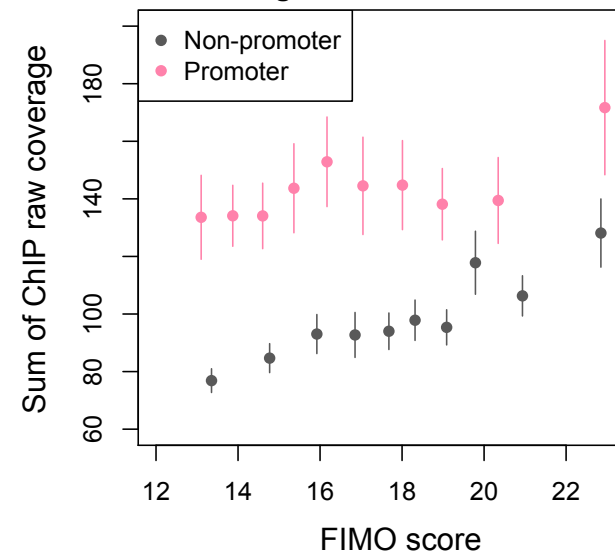**d****Enrichment  
given Motif1 score**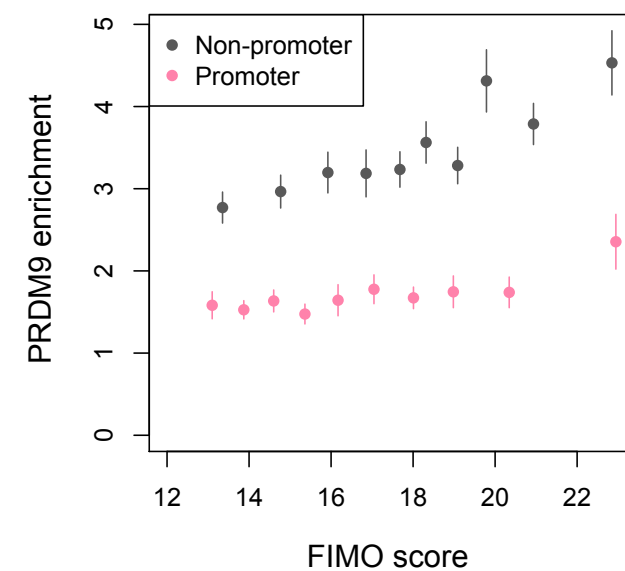**e****Testis DMC1 enrichment**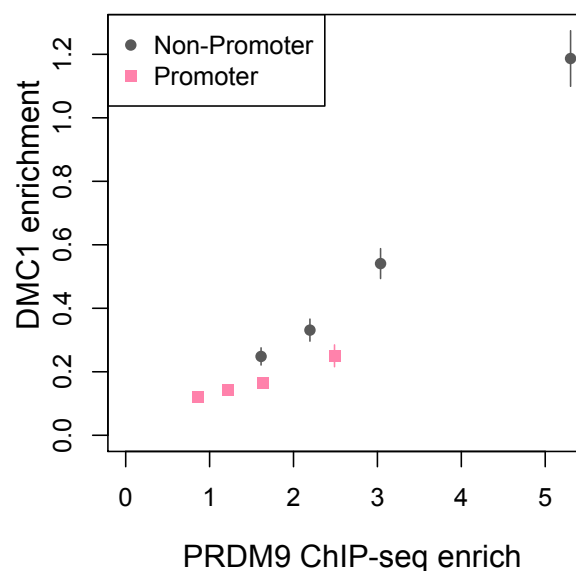**f****Testis DMC1 coverage**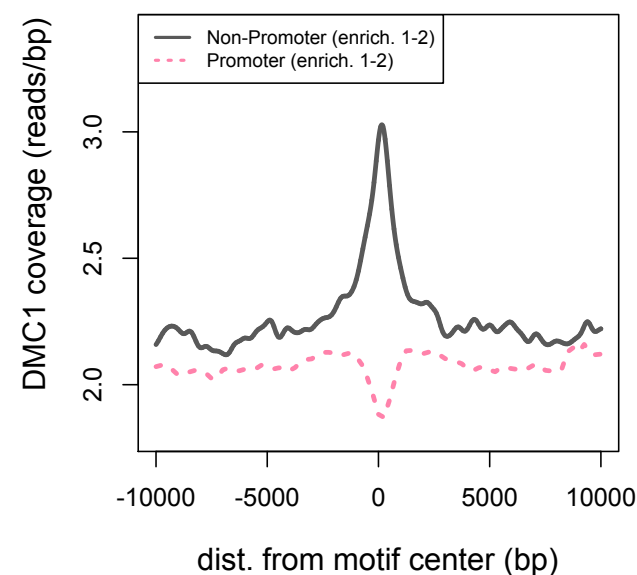

Supplement: supp [file elife-28383-supp-v1.zip]
