# Supplementary figures and images for: A map of human PRDM9 binding provides evidence for novel behaviors of PRDM9 and other zinc-finger proteins in meiosis
Source: eLife journal article supplement (doi:10.7554/elife.28383), 2017-10-26

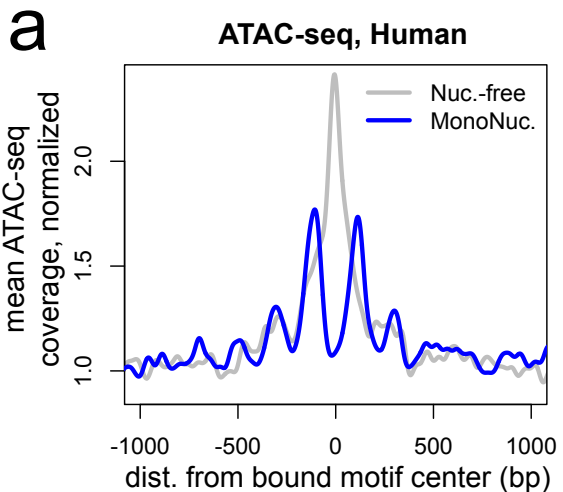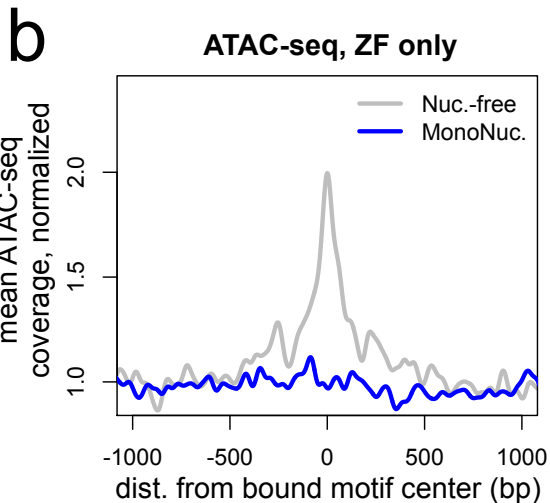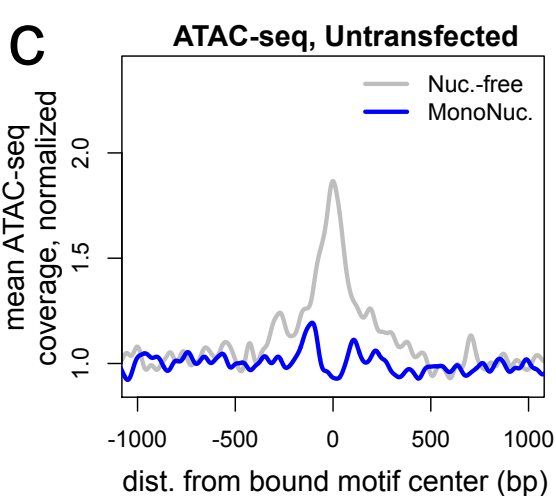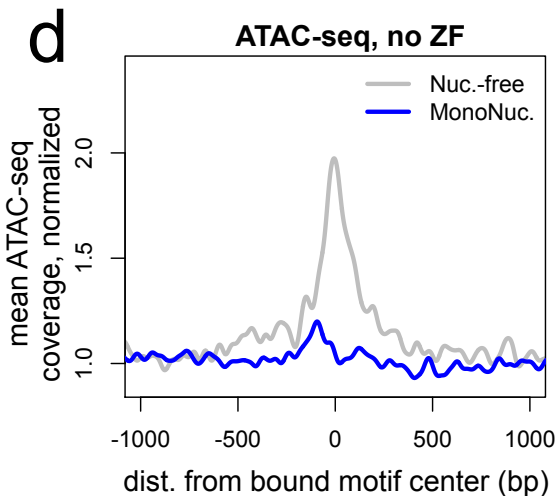

Supplement: supp [file elife-28383-supp-v1.zip]

anti-HA  
western antibody

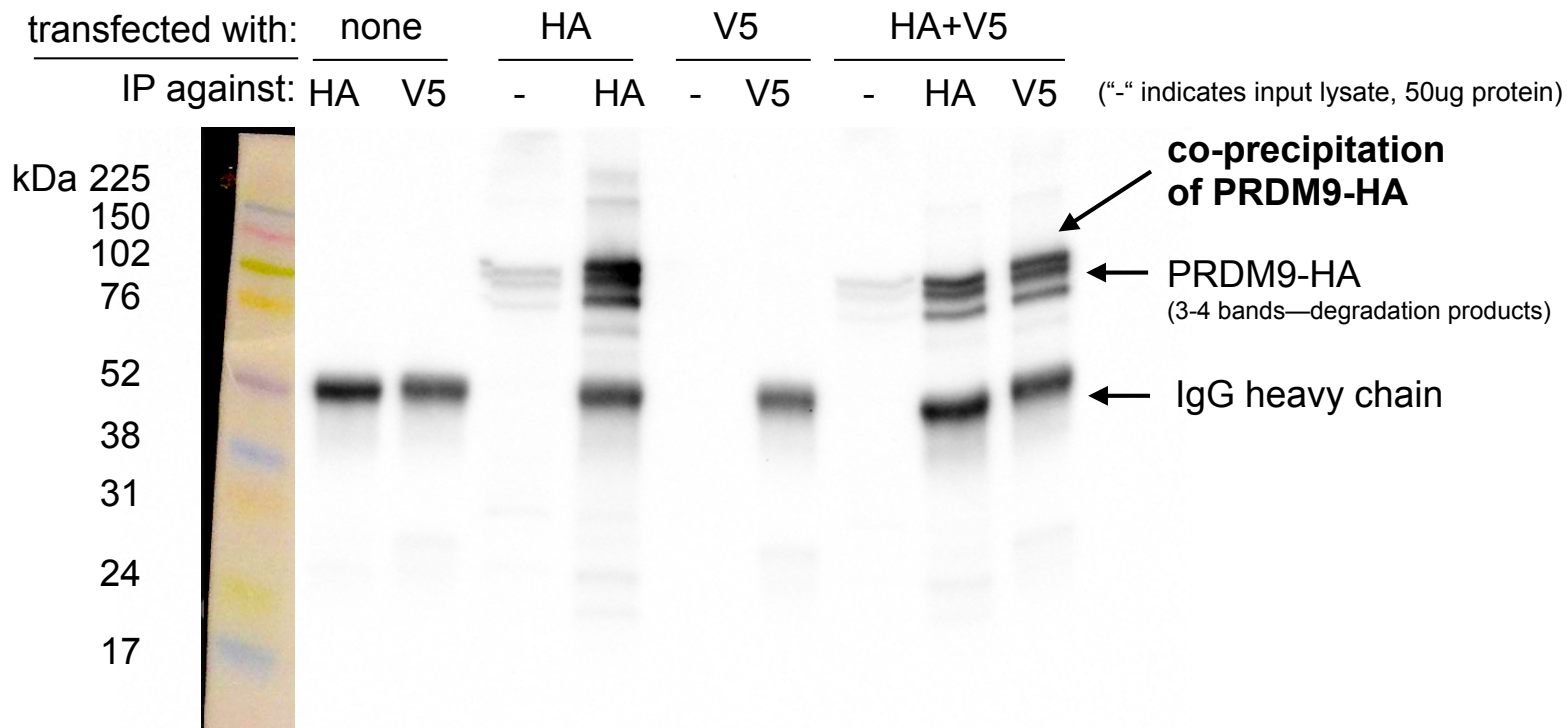

replications  
with mock controls

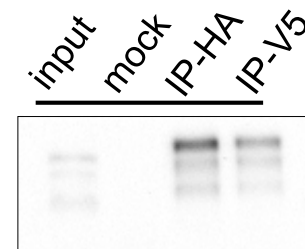

anti-V5  
western antibody

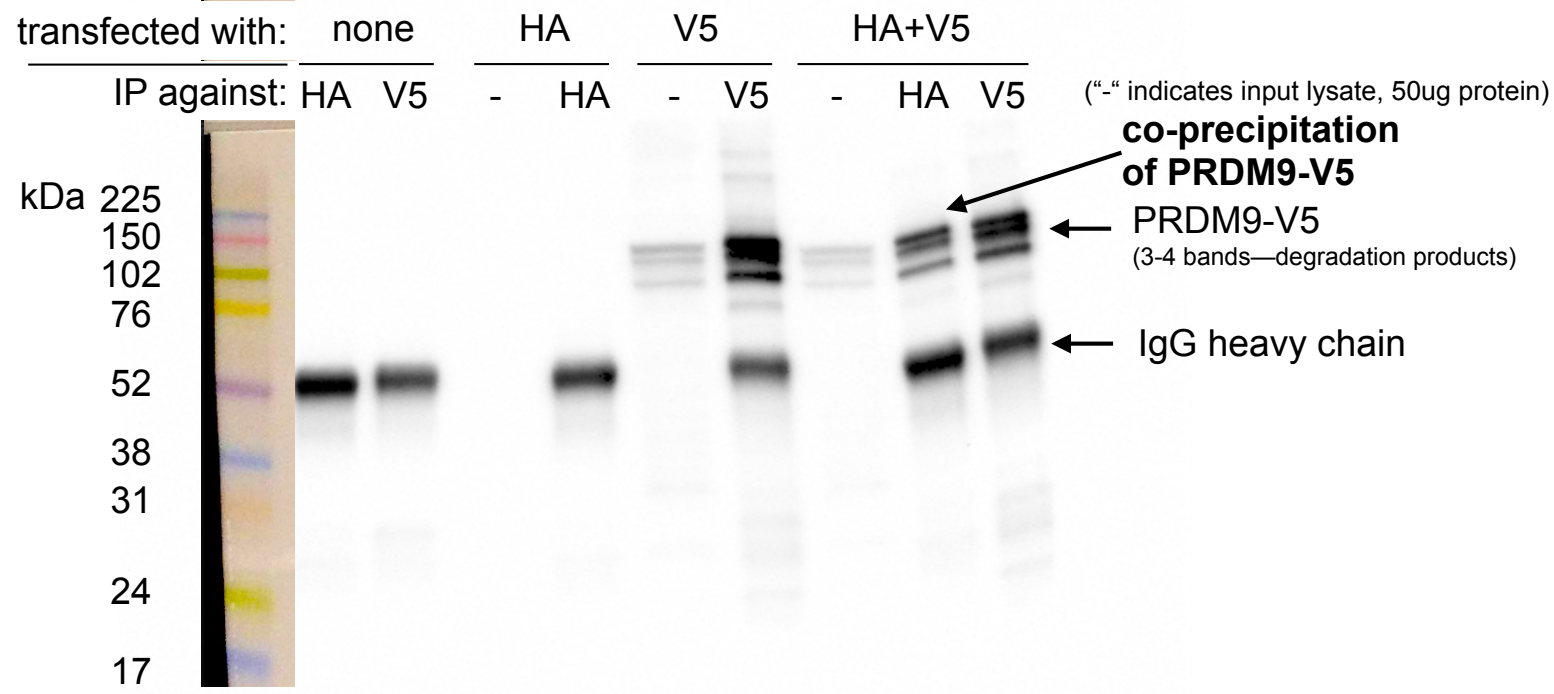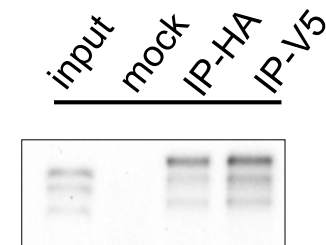

Supplement: supp [file elife-28383-supp-v1.zip]

**a**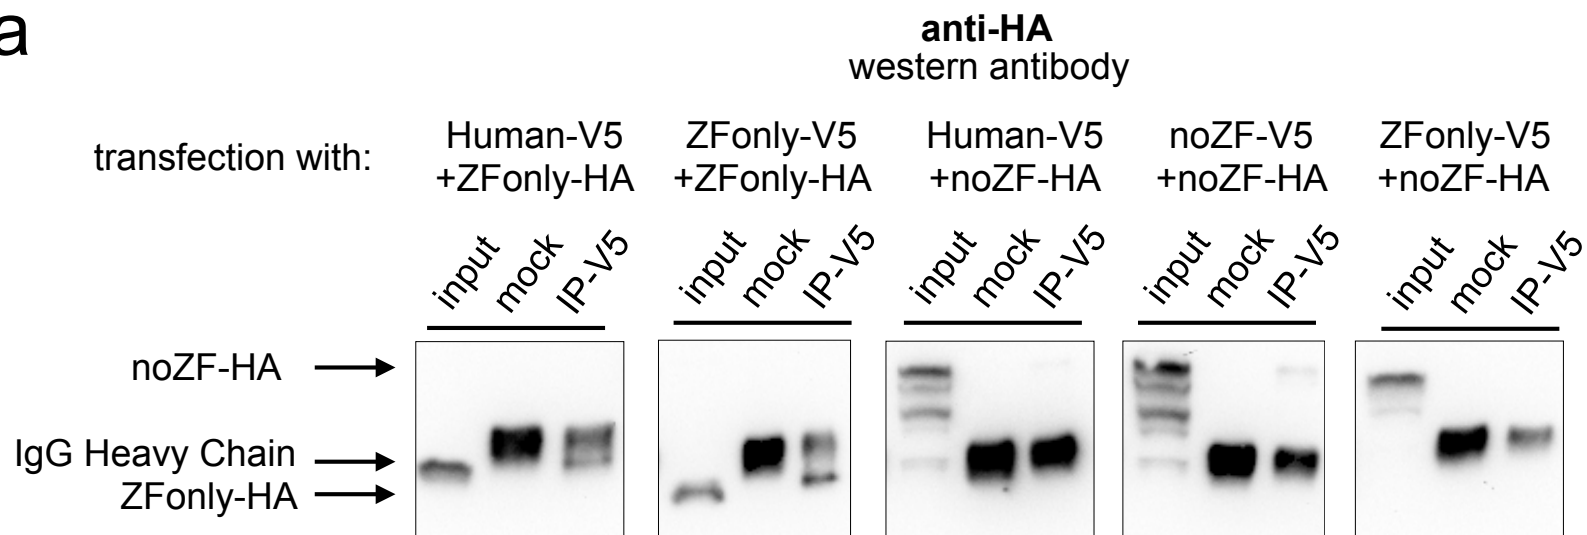**b**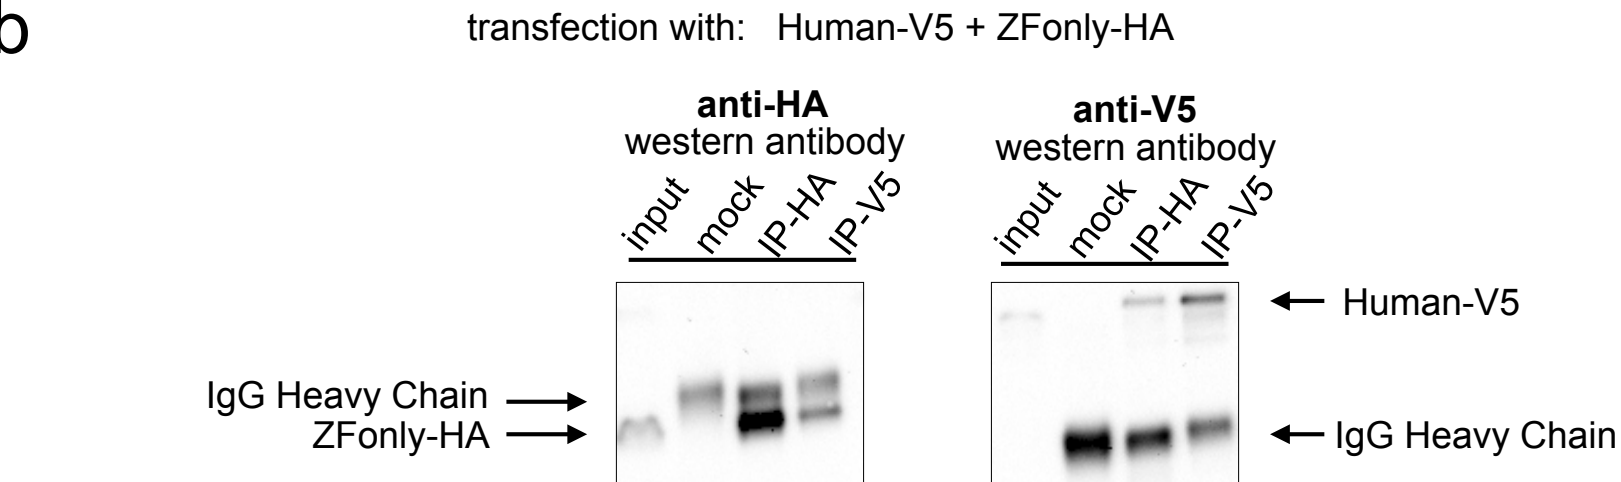

Supplement: supp [file elife-28383-supp-v1.zip]

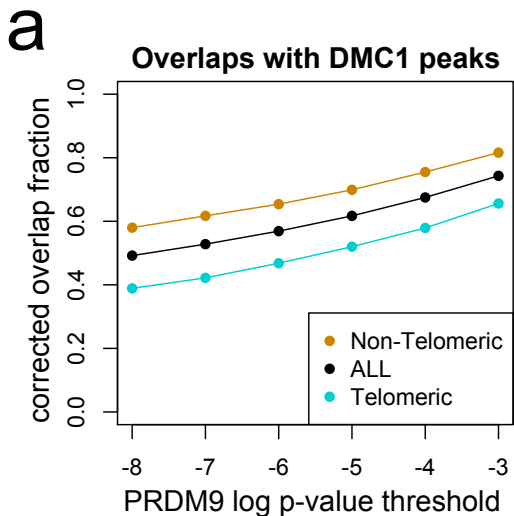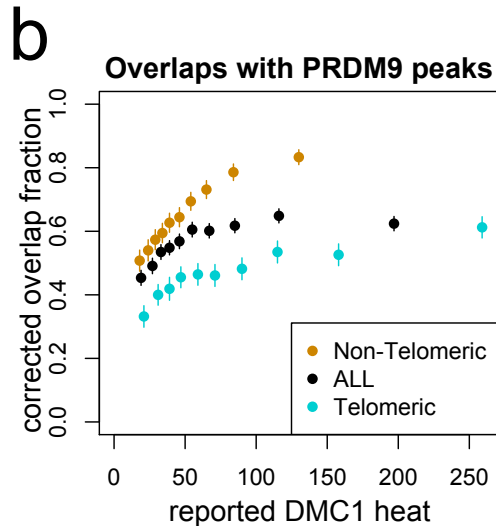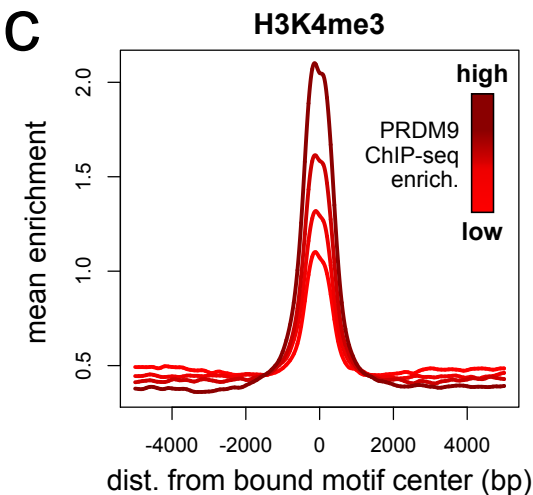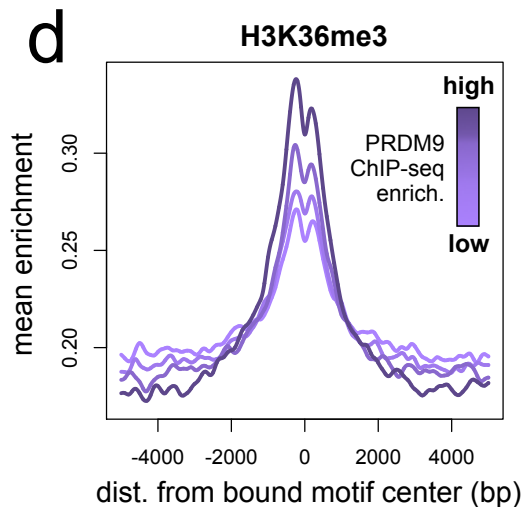

Supplement: supp [file elife-28383-supp-v1.zip]

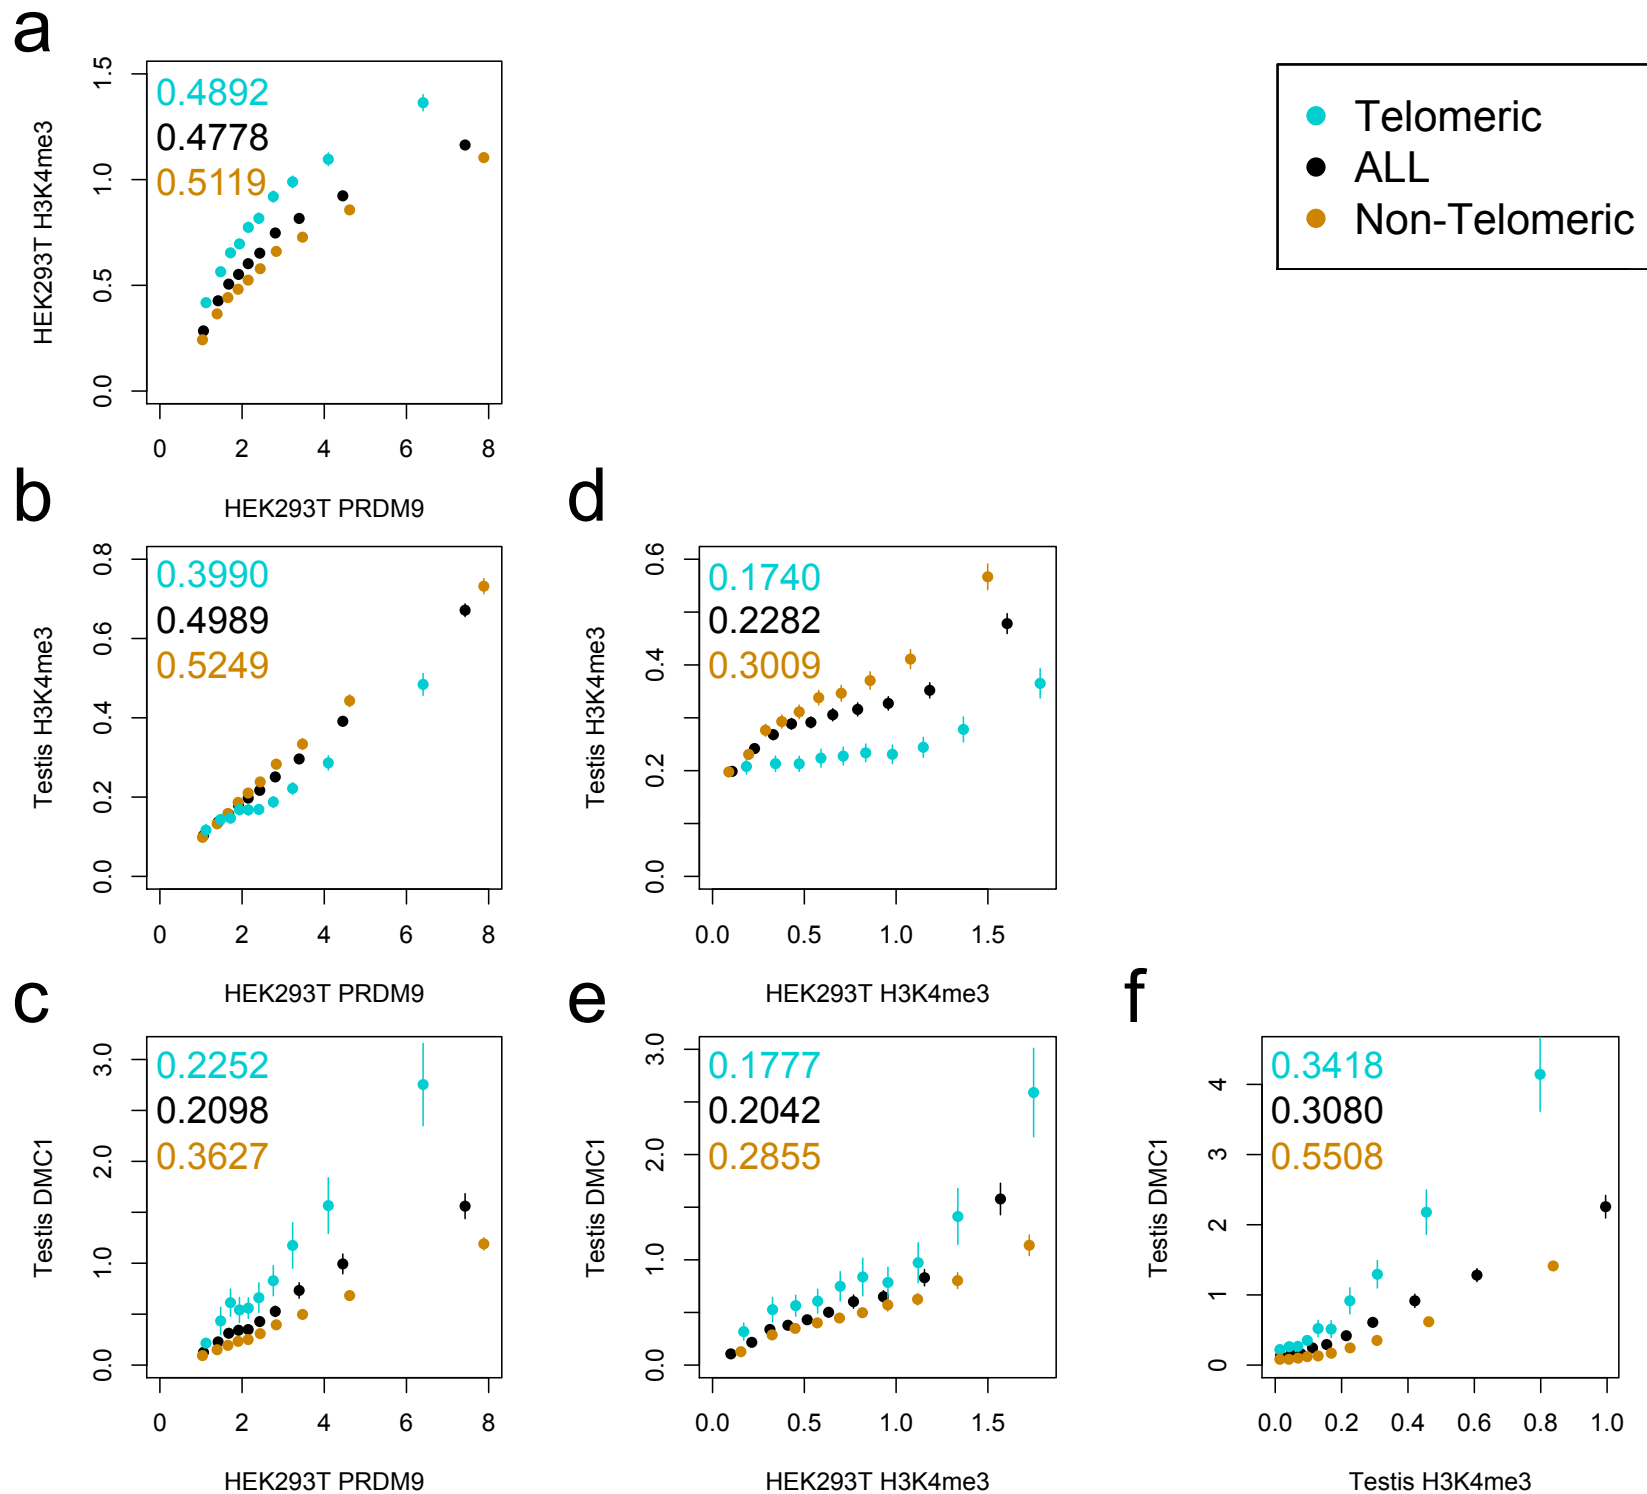

Supplement: supp [file elife-28383-supp-v1.zip]

a

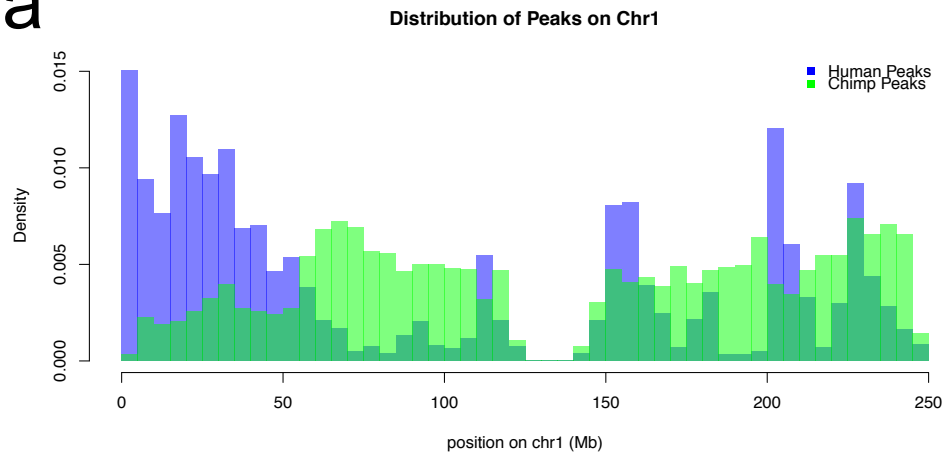

b

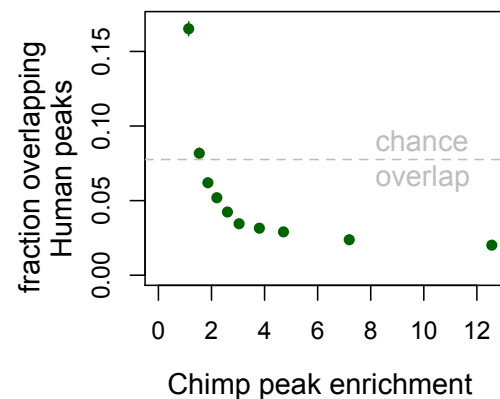

c

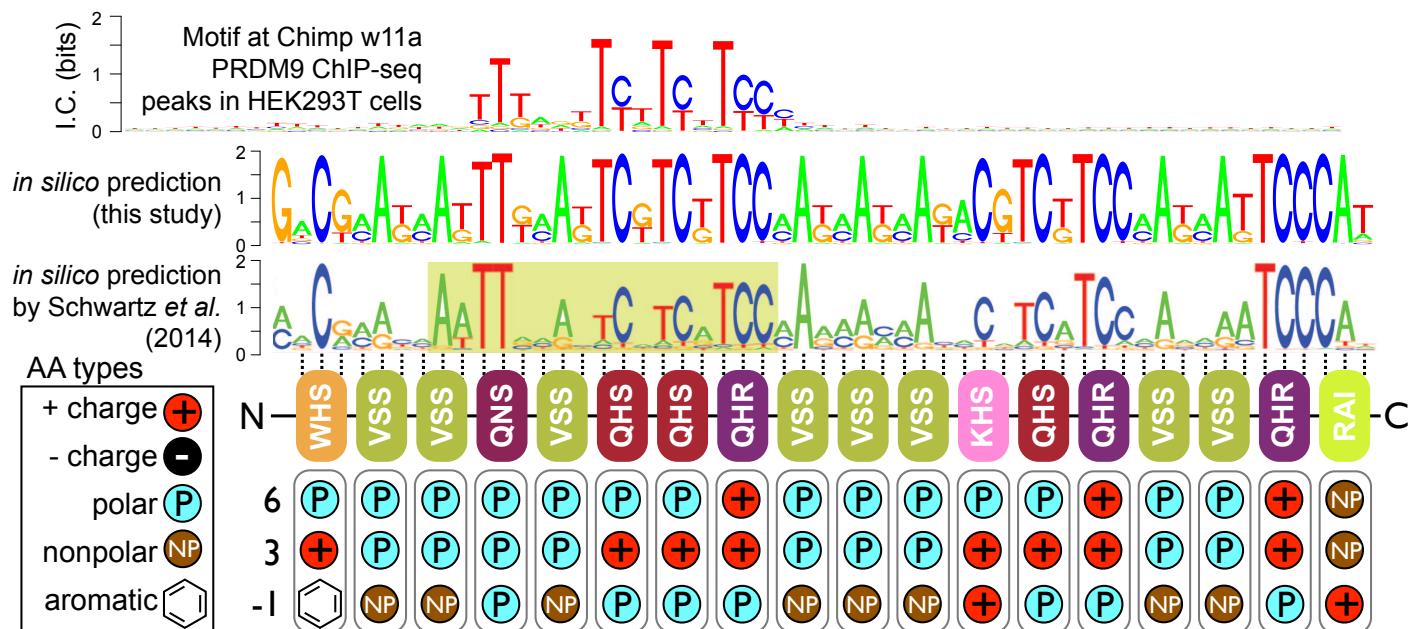

Supplement: supp [file elife-28383-supp-v1.zip]

**a**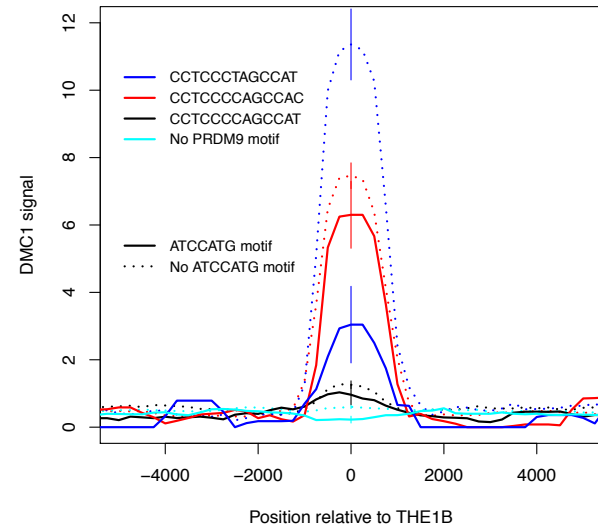**b**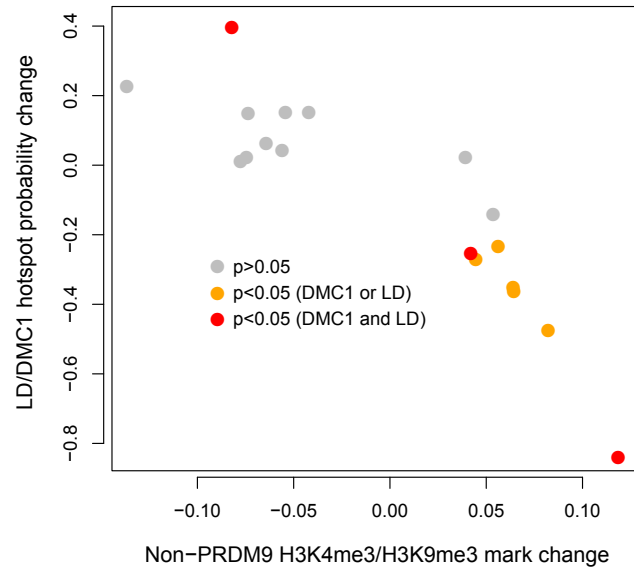**c**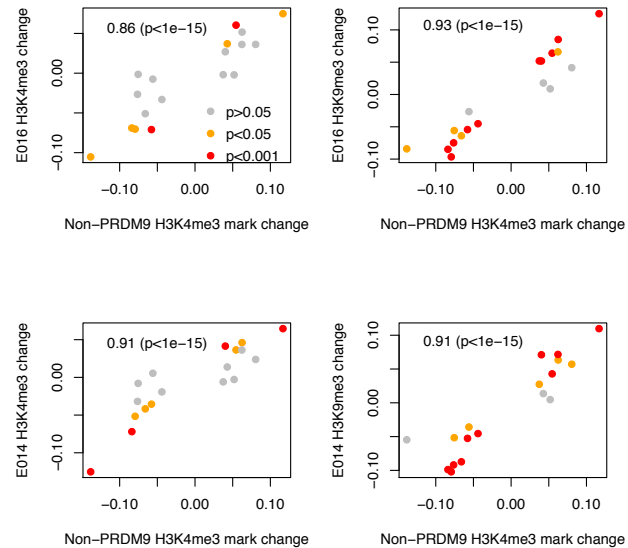

Supplement: supp [file elife-28383-supp-v1.zip]
